# Trade-offs between individual and ensemble forecasts of an emerging infectious disease

Rachel J. Oidtmann<sup>1,2,3,\*</sup>, Elisa Omodei<sup>2</sup>, Moritz U. G. Kraemer<sup>4,5,6</sup>,  
Carlos A. Castañeda-Orjuela<sup>7</sup>, Erica Cruz-Rivera<sup>7</sup>, Sandra  
Misnaza-Castrillón<sup>7</sup>, Myriam Patricia Cifuentes<sup>8</sup>, Luz Emilse Rincon<sup>8</sup>,  
Viviana Cañon<sup>9</sup>, Pedro de Alarcon<sup>10</sup>, Guido España<sup>1</sup>, John H. Huber<sup>1</sup>,  
Sarah C. Hill<sup>4,11</sup>, Christopher M. Barker<sup>12</sup>, Michael A. Johansson<sup>13</sup>,  
Carrie A. Manore<sup>14</sup>, Robert C. Reiner, Jr.<sup>15</sup>, Isabel  
Rodriguez-Barraquer<sup>16</sup>, Amir S. Siraj<sup>1</sup>, Enrique Frias-Martinez<sup>17</sup>,  
Manuel García-Herranz<sup>2,\*</sup>, and T. Alex Perkins<sup>1,\*</sup>

<sup>1</sup>*Department of Biological Sciences and Eck Institute for Global Health, University of Notre Dame, Notre Dame, IN, USA*

<sup>2</sup>*UNICEF, New York, NY, USA*

<sup>3</sup>*Department of Ecology and Evolution, University of Chicago, Chicago, IL, USA*

<sup>4</sup>*Department of Zoology, University of Oxford, Oxford, UK*

<sup>5</sup>*Boston Children's Hospital, Boston, MA, USA*

<sup>6</sup>*Harvard Medical School, Boston, MA, USA*

<sup>7</sup>*Instituto Nacional de Salud, Bogotá, Colombia*

<sup>8</sup>*Ministerio de Salud y Protección Social, Bogotá, Colombia*

<sup>9</sup>*UNICEF, Bogotá, Colombia*

<sup>10</sup>*LUCA Telefonica Data Unit, Madrid, Spain*

<sup>11</sup>*Department of Pathobiology and Population Sciences, The Royal Veterinary College, London, UK*

<sup>12</sup>*Department of Pathology, Microbiology, and Immunology, School of Veterinary Medicine, University of California, Davis, CA, USA*

<sup>13</sup>*Division of Vector-Borne Diseases, Centers for Disease Control and Prevention, San Juan, Puerto Rico*

<sup>14</sup>*Information Systems and Modeling (A-1), Los Alamos National Laboratory, Los Alamos, NM, USA*

<sup>15</sup>*Institute for Health Metrics and Evaluation, University of Washington, Seattle, WA, USA*

<sup>16</sup>*Department of Medicine, University of California, San Francisco, CA, USA*

<sup>17</sup>*Telefonica Research, Madrid, Spain*

\* *Corresponding authors: [rjoidtman@gmail.com](mailto:rjoidtman@gmail.com), [mgarciaherranz@unicef.org](mailto:mgarciaherranz@unicef.org), [taperkins@nd.edu](mailto:taperkins@nd.edu)*

June 30, 2021

## Abstract

**NOTE: This preprint reports new research that has not been certified by peer review and should not be used to guide clinical practice.**  
When new pathogens emerge, many questions arise about their future spread, some of which can be addressed with probabilistic forecasts. The many uncertainties about the epidemiology of emerging pathogens can make

it difficult to choose among model structures and assumptions, however. To assess the potential for uncertainties about emerging pathogens to affect forecasts of their spread, we evaluated the performance of a suite of 16 forecasting models in the context of the 2015-2016 Zika epidemic in Colombia. Each model featured a different combination of assumptions about the role of human mobility in driving transmission, spatiotemporal variation in transmission potential, and the number of times the virus was introduced. All models used the same core transmission model and the same iterative data assimilation algorithm to generate forecasts. By assessing forecast performance through time using logarithmic scoring with ensemble weighting, we found that which model assumptions had the most ensemble weight changed through time. In particular, spatially coupled models had higher ensemble weights in the early and late phases of the epidemic, whereas non-spatial models had higher ensemble weights at the peak of the epidemic. We compared forecast performance of the equally weighted ensemble model to each individual model and identified a trade-off whereby certain individual models outperformed the ensemble model early in the epidemic but the ensemble model outperformed all individual models on average. On balance, our results suggest that suites of models that span uncertainty across alternative assumptions are necessary to obtain robust forecasts in the context of emerging infectious diseases.

# 1 Introduction

2 Pathogen emergence, or the phenomenon of novel or established pathogens invad-  
3 ing a new host population, has been occurring more frequently in recent decades  
4 [1]. In the last 40 years, more than 150 pathogens of humans have been identified  
5 as emerging or re-emerging [2, 3]. In these situations, host populations are largely  
6 susceptible, which can result in dynamics ranging from self-limiting outbreaks, as  
7 with Lassa virus [4], to sustained pandemics, as with HIV [5], depending on the  
8 pathogen’s traits and the context in which it emerges. When emergence does oc-  
9 cur, mathematical models can be helpful for anticipating the future course of the  
10 pathogen’s spread [6, 7, 8].

11 A necessary part of using models to forecast emerging pathogens is making deci-  
12 sions about how to handle the many uncertainties associated with these unfamiliar  
13 microbes [8]. Given the biological and ecological diversity of emerging pathogens,  
14 there is often considerable uncertainty about various aspects of their natural his-  
15 tories, such as their potential for superspreading [9], the role of human mobility in  
16 their spatial spread [10, 11], drivers of spatiotemporal variation in their transmission  
17 [6, 12], and even their modes of transmission [13]. In the case of MERS-CoV, for ex-  
18 ample, it took years to determine that the primary transmission route was spillover  
19 from camels rather than sustained human-to-human transmission [14]. A lack of  
20 definitive understanding about such basic aspects of natural history represents a  
21 major challenge for forecasting emerging pathogens.

22 Inevitably, different forecasters make diverse choices about how to address un-  
23 known aspects of an emerging pathogen’s natural history, as they do for numerous  
24 model features. This diversity of approaches has itself been viewed as part of the  
25 solution to the problem of model uncertainty, based on the idea that the biases of  
26 different models might counteract one another to produce a reliable forecast when  
27 viewed from the perspective of an ensemble of models [15]. This idea has support in  
28 multi-model efforts to forecast seasonal transmission of endemic pathogens, such as  
29 influenza and dengue viruses [16, 17, 18, 19, 20], with ensemble forecasts routinely  
30 outperforming individual models. These successes with endemic pathogens have  
31 motivated multi-model approaches in response to several emerging pathogens, in-  
32 cluding forecasting challenges for chikungunya [21] and Ebola [22], vaccine trial site  
33 selection for Zika [23], and a multi-model decision-making framework for COVID-19  
34 [15, 24].

35 Although there has been increased attention to multi-model forecasting of emerg-  
36 ing pathogens in the last few years, these initiatives have involved significant effort to  
37 coordinate forecasts among multiple modeling groups [25, 26]. Coordination across  
38 multiple groups has clear potential to add value beyond what any single modeling  
39 group can offer alone. At the same time, using multiple models to hedge against  
40 uncertainties about a pathogen’s natural history could potentially improve forecasts  
41 from a single modeling group, too [16, 18]. This could, in turn, improve ensemble  
42 forecasts based on contributions from multiple modeling groups. An ensemble-based  
43 approach by one modeling group that contributes to forecasts of seasonal influenza  
44 in the United States demonstrates the success that a single modeling group can  
45 achieve with an ensemble-based approach [27], and that such an ensemble can con-  
46 tribute value to an ensemble of forecasts from multiple modeling groups [18]. Similar  
47 approaches have not been widely adopted for forecasting emerging pathogens by a  
48 single modeling group (although see [28]), despite the heightened uncertainty inher-  
49 ent to emerging pathogens.

50 Here, we evaluate the potential for an ensemble of models that span uncertain-  
51 ties in pathogen natural history, but share a common core structure, to accurately  
52 forecast the dynamics of an emerging pathogen. We do so in the context of the  
53 2015-2016 Zika epidemic in Colombia, which was well-characterized epidemiologi-  
54 cally (Fig. 1) [29] and involved potentially consequential uncertainties about: i)  
55 the role of human mobility in facilitating spread across the country [30], ii) the  
56 relationship between environmental conditions and transmission of this mosquito-  
57 borne virus [6, 12], and iii) the number of times the virus was introduced into the  
58 country [31]. In this retrospective analysis, we used data assimilation to update 16  
59 distinct models throughout the epidemic period and assessed forecast performance  
60 of all models relative to an equally weighted ensemble model. This allowed us to  
61 quantify the contribution of variants of each of the three aforementioned uncertain-  
62 ties to model performance during different phases of the epidemic. In doing so, we  
63 sought to not only assess the performance of the ensemble model relative to indi-  
64 vidual models, but also to learn about features of individual models that may be  
65 associated with improved forecast accuracy over the course of an epidemic.

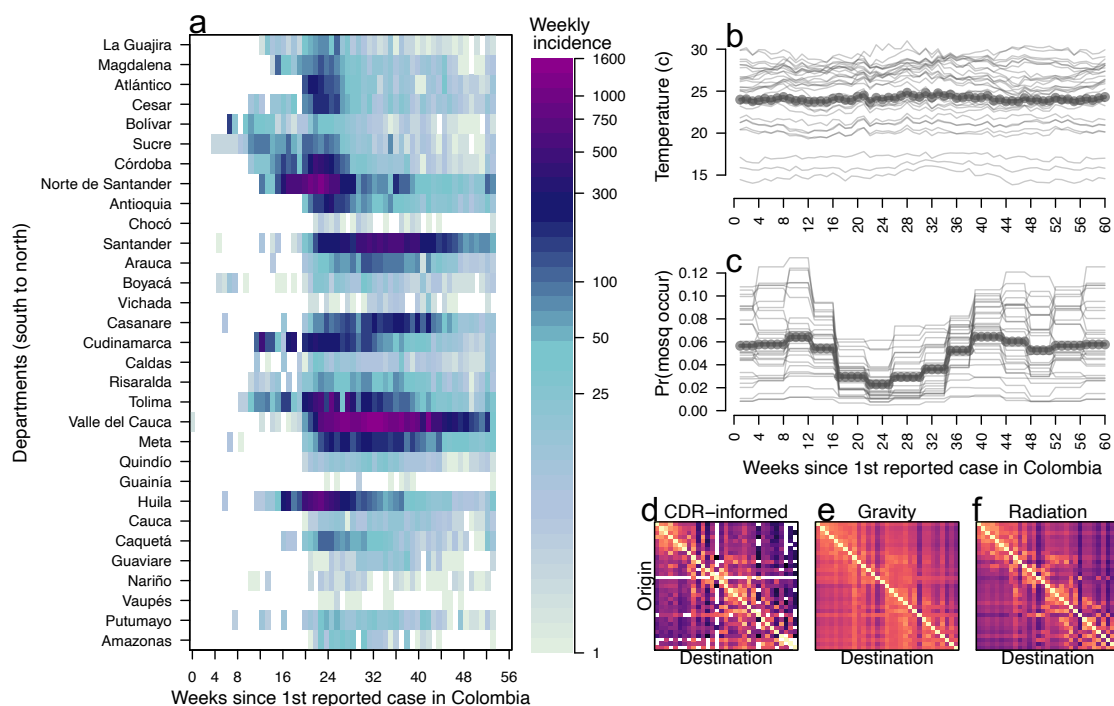

Figure 1: **Temporal and spatial variation of Zika incidence, temperature, and mosquito occurrence probability in Colombia.** *a.* Weekly Zika incidence from August 9, 2015 to October 1, 2016 with all 31 mainland departments approximately ordered from south to north. *b.* Points indicate average temperature data and lines indicate temperature by department. *c.* Points indicate average mosquito occurrence probability and lines indicate mosquito occurrence probability by department. *d-f.* Mobility matrices under three different assumptions of mobility, with departments ordered south to north on y-axis and north south on x-axis. Tan indicates high rates of mobility, dark purple indicates low rates of mobility, white indicates no movements.

## 66 2 Results

### 67 2.1 General forecast performance

68 Before any data assimilation had occurred, our 16 models (See Table 1) initially  
69 forecasted very low incidence across most departments over the 60-week period of  
70 our analysis (Figs. 2 top row, S12). Even so, short-term forecasts over a four-week  
71 horizon were consistent with the still-low observed incidence at that time (Figs. S3  
72 purple, S18). By the time twelve weeks of data had been assimilated into the mod-  
73 els, forecasts over the 60-week period of our analysis were considerably higher than  
74 the initial forecasts and better aligned with the observed trajectory of the epidemic  
75 (Figs. 2 second row, S13). Over those first twelve weeks, model parameters changed  
76 modestly (Fig. S6) and correlations among parameters began to emerge (Figs. S7,  
77 S8, S9, S10). We observed a more substantial change in the proportion of individ-  
78 ual stochastic realizations (where the  $n^{\text{th}}$  stochastic realization is the  $n^{\text{th}}$  “particle”  
79 generated from some set of parameters  $\vec{\theta}_{t,n}$  at time  $t$ ) resulting in an epidemic, with  
80 those particles resulting in no epidemic being filtered out almost entirely by week  
81 12 (Fig. S1). Because each particle retained its stochastic realization of past in-  
82 cidence across successive data assimilation periods, stochastic realizations of past  
83 incidence were inherited by particles much like parameter values. By week 24, many  
84 of the models correctly recognized that they were at or near the epidemic’s peak  
85 and forecasted a downward trajectory for the remainder of the 60-week period of our  
86 analysis (Figs. 2 third row, S27). The particle filtering algorithm replaced nearly  
87 half of the original particles by that point (Fig. S2), with the new particles con-  
88 sisting of stochastic realizations of past incidence selected through data assimilation  
89 and updated every four weeks with forward simulations based on either original or  
90 new parameter combinations. As the end of the 60-week period of our analysis was  
91 approached, parameter correlations continued to strengthen (Figs. S7, S8, S9, S10),  
92 our estimate of the reporting probability increased (Fig. S6), and only around 20%  
93 of the original particles remained (Fig. S1).

Table 1: Different model assumptions regarding the role of human mobility in facil-  
itating pathogen spread across the country, the relationship between environmental  
conditions and transmission of ZIKV, and the number of times the virus was in-  
troduced into Colombia. The suite of 16 models reflected factorial combinations of  
these three assumptions.

| Human mobility    | Transmission potential | Number of ZIKV introductions |
|-------------------|------------------------|------------------------------|
| CDR-informed      | Fixed $R$ [6]          | One                          |
| Gravity model     | Dynamic $R$ [12]       | Two                          |
| Radiation model   |                        |                              |
| No human mobility |                        |                              |

### 94 2.2 Model-specific forecast performance

95 To quantify the forecast performance of individual models over time, we used loga-  
96 rithmic scoring (hereafter, log scoring) to compare forecasts of cumulative incidence  
97 four weeks into the future to observed values at departmental and national levels.  
98 We assessed log scores once the first case was reported nationally for spatially cou-  
99 pled models (i.e., models with explicit human mobility), and once the first case was

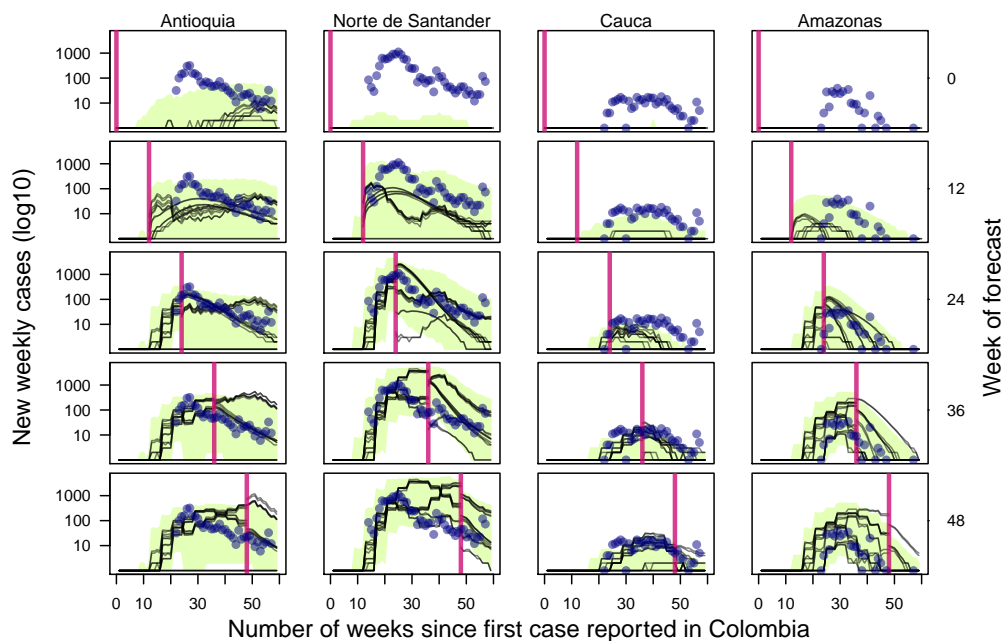

Figure 2: **Observed incidence (navy points) with the median forecast for 16 models (black lines) with the equally weighted ensemble model (green band) for Antioquia, Norte de Santander, Cauca, and Amazonas at five points throughout the epidemic.** Plotted departments reflect differences in population, epidemic size, and geographic regions of Colombia and are represented by each column. The vertical pink line indicates the point at which the forecast was made (also labeled on the right axis), with data to the left of the line assimilated into the model fit. Forecasts to the right of the vertical line change as more data is assimilated into the model, while model fits to the left of the vertical line do not change. The green band reflects the 50% credible interval of the equally weighted ensemble model.

100 reported in each department for non-spatial models (i.e., models with no explicit  
101 human mobility). Log scores were generally high for spatially coupled models early  
102 in the epidemic, given that observed cases and forecasts were both low at that time  
103 (Fig. S18, a-c). By week 12, as cases were reported in more departments, the accu-  
104 racy of forecasts from non-spatial models improved (Fig. S18 d onward). Forecast  
105 performance around the peak of the epidemic differed considerably across models  
106 and departments, with forecasts from non-spatial models being somewhat lower  
107 than observed incidence and forecasts from spatially coupled models being some-  
108 what higher (Fig. S14, Fig. S18 f-j). Around the peak of the epidemic, forecasts  
109 from spatially coupled models generally had higher log scores in departments with  
110 lower incidence (e.g., Nariño). Later in the epidemic (weeks 40-56), some models  
111 continued to forecast higher incidence than observed in some departments, despite  
112 having passed the peak incidence of reported cases (Fig. S16). In particular, models  
113 that used the dynamic instead of the static formulation of the reproduction number  
114 (i.e., the temporal relationship between  $R$  and environmental drivers is dynamic  
115 instead of static) were more susceptible to this behavior (note lower log scores in  
116 “Rt” versus “R” models in Fig. S18 k-o), given that their forecasts were sensitive to  
117 seasonal changes in temperature and mosquito occurrence.

118 Next, we used these log scores in an expectation-maximization (EM) optimiza-  
119 tion algorithm [32] to identify an optimal weighting of retrospective model-specific  
120 forecasts into an ensemble forecast (Fig. S25-S29) in each forecasting period (Fig.  
121 S17). To learn how model assumptions affected the inclusion of different models into  
122 the optimally weighted ensemble for each forecasting period, we summed and then  
123 normalized models’ ensemble weights across each class of assumption (Fig. 3). Over  
124 the course of the epidemic, changes in weighting for the assumptions about human  
125 mobility and spatiotemporal variation in transmission, but not about the number  
126 of virus introductions into the country, closely followed patterns in the trajectory  
127 of the national epidemic. Spatially coupled models had most or all of the weight  
128 in the early and late stages of the epidemic, while non-spatial models had most of  
129 the weight around the peak of the epidemic (Fig. 3 b). Although the non-spatial  
130 models somewhat under-predicted incidence in the middle stages of the epidemic,  
131 this was often to a lesser extent than the spatially coupled models’ over-predictions  
132 of incidence (Fig. S3). As a result, the EM algorithm achieved a balance between  
133 the over- and under-predictions of these different models.

134 The maximum ensemble weight in any forecasting period was 0.802, held by  
135 one model with a static  $R$ , two ZIKV introductions into the country, and CDR-  
136 informed human mobility 12 weeks after the first reported Zika case (Fig. S17).  
137 Combined, the two models with static  $R$  and CDR-informed human mobility data  
138 had the most instances of a non-zero ensemble weight (Fig. S17), occurring in 13  
139 of 15 assimilation periods, with an average weight of 0.18. Around the peak of  
140 the epidemic, non-spatial models had the highest ensemble weight, reflecting the  
141 accuracy of short-term forecasts in some departments (e.g., Magdalena and Vaupés)  
142 and their overall accuracy in nationally-aggregated forecasts (Fig. S11). Near the  
143 end of the epidemic, the ensemble weight for models with a static  $R$  (Fig. 3 c)  
144 increased as their forecasts more closely matched the downturn of incidence later  
145 in the epidemic relative to models with dynamic  $R$  (Fig. S20). This was likely the  
146 result of mosquito occurrence probability and temperature becoming more favorable  
147 for transmission in many departments later in the epidemic (Fig. S21-S22), causing  
148 the dynamic  $R$  models to forecast a late resurgence in Zika incidence.

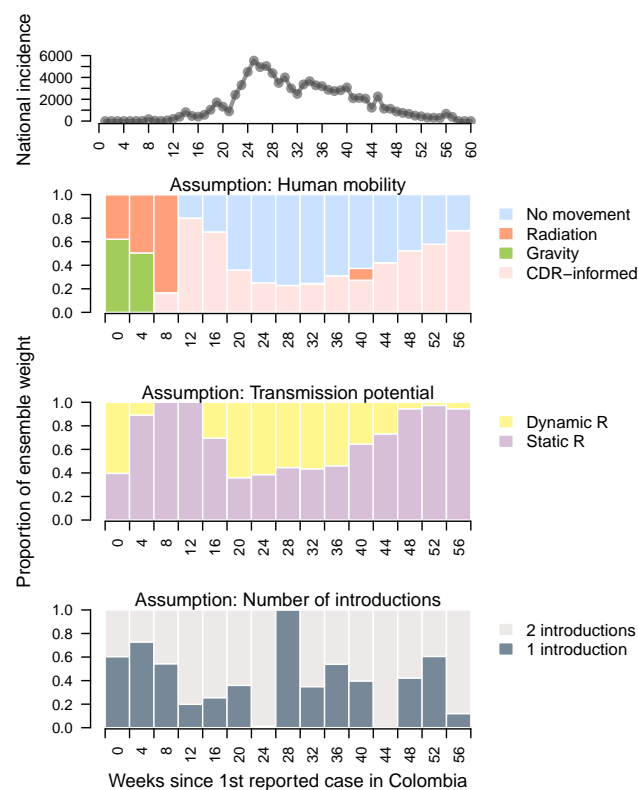

Figure 3: **Ensemble weight partitioned across assumptions about the role of human mobility in driving transmission, drivers of spatiotemporal variation in  $R$ , and the number of ZIKV introductions.** *a*: Weekly Zika incidence aggregated to the national scale. *b-d*: Proportion of ensemble weight across assumption type colored by explicit assumption.



## 149 2.3 Target-oriented forecast performance

150 Short-term changes in incidence are an important target of infectious disease fore-  
151 casting, but there are other targets of potentially greater significance to public health  
152 decision making. To explore these, we evaluated the ability of the 16 models—and an  
153 evenly weighted ensemble—to forecast three targets at the department level: peak  
154 incidence, week of peak incidence, and onset week, which we defined as the week  
155 by which ten cases were first reported. We evaluated models based on log scores  
156 of these targets. Summing log scores across departments to allow for comparisons  
157 across different forecasting periods (Fig. 4), we found that, on average, the en-  
158 semble model outperformed every individual model for all three forecasting targets  
159 (indicated by the ensemble model’s location on the y-axis). Early in the epidemic,  
160 spatially coupled models with a static  $R$  performed only slightly better (up to 1%)  
161 than the equally weighted ensemble (Fig. 4). For the remainder of the epidemic,  
162 the equally weighted ensemble model outperformed all individual models (Fig. 4).  
163 Such small changes in forecast performance when averaging over space shows that  
164 differences in forecast performance across space dominate relative to those across  
165 time.

166 By summing log scores across forecasting periods to allow for comparisons across  
167 departments (Fig. 5), we found that some individual models outperformed the  
168 ensemble model in forecasting the peak incidence and the week of peak incidence.  
169 In departments on the Caribbean Coast that experienced intermediate epidemic  
170 sizes (e.g., Antioquia, Sucre, Atlántico), spatially coupled models with a static  $R$   
171 outperformed the ensemble model at forecasting the peak week by about 10% (Fig.  
172 5 A). At those same locations, the equally weighted ensemble performed better than  
173 or similar to those same models at forecasting peak incidence and onset week (Fig. 5  
174 b-c). Over forecasting periods and departments, the non-spatial models consistently  
175 had lower average forecast scores than the spatially coupled models (indicated by  
176 their location on the y-axis in Figs. 4-5). This trend appeared because initial  
177 forecasts from non-spatial models were not updated until the first case appeared in  
178 each department, while initial forecasts from spatially coupled models were updated  
179 when the first case appeared in the country.

## 180 3 Discussion

181 We assessed the potential for a suite of individual models that span a range of un-  
182 certainties, and ensembles of these models, to accurately forecast the dynamics of an  
183 emerging pathogen. Results from the general forecast performance analysis demon-  
184 strated that once we began assimilating data into models, forecasts rapidly became  
185 more accurate. Models were initialized with a wide range of parameter values [33],  
186 with many initial parameter combinations producing unrealistic forecast trajectories,  
187 but after only four assimilation periods (12 weeks), nearly 100% of those parameters  
188 that produced zero infections were dropped. Similar to other retrospective forecast  
189 analyses [16, 34], as more data were assimilated into the models over time, the model  
190 fits and forecasts generally became more closely aligned with temporal trends in the  
191 data. This was because the particle filter allowed model parameters to continually  
192 adapt to noisy data [35]. There were still some exceptions where the particle filter  
193 could not fully compensate for shortcomings of the transmission model, such as the  
194 drastic underestimates of incidence in departments with sub-optimal conditions for  
195 transmission (e.g., static  $R$  model in Risaralda in Fig. S20). At the same time,

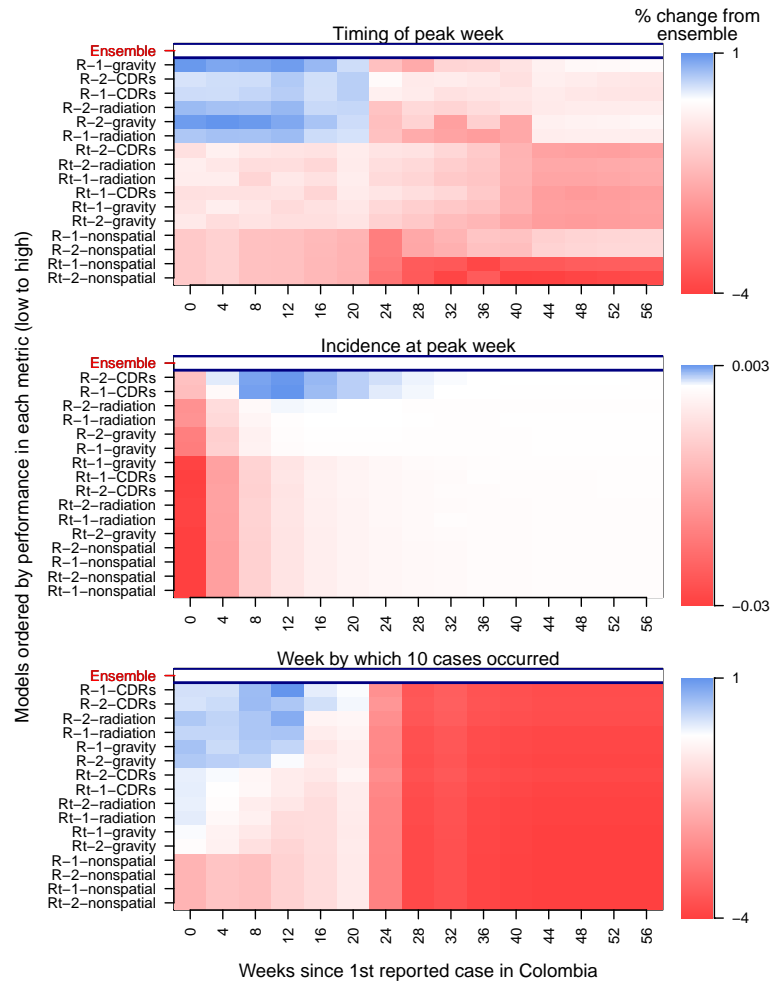

Figure 4: **Model-specific forecast scores relative to equally weighted ensemble model for each assimilation period and forecasting target.** *a.* Timing of peak week (within two weeks). *b.* Incidence at peak week. *c.* Onset week. Forecast scores are averaged over department. Models are ordered on the y-axis by average forecast score for each forecasting target. Model names on the y-axis are abbreviated such that “R” or “Rt” indicates assumption about spatiotemporal variation, “1” or “2” indicates number of introduction events, and “CDRs”, “gravity”, “radiation” or “nonspatial” indicates the human mobility assumption. In the heat plot, blue indicates individual model performed better than the ensemble model in a given department, red indicates individual model performed worse than ensemble model, and white indicates individual model performed roughly the same as the ensemble model.

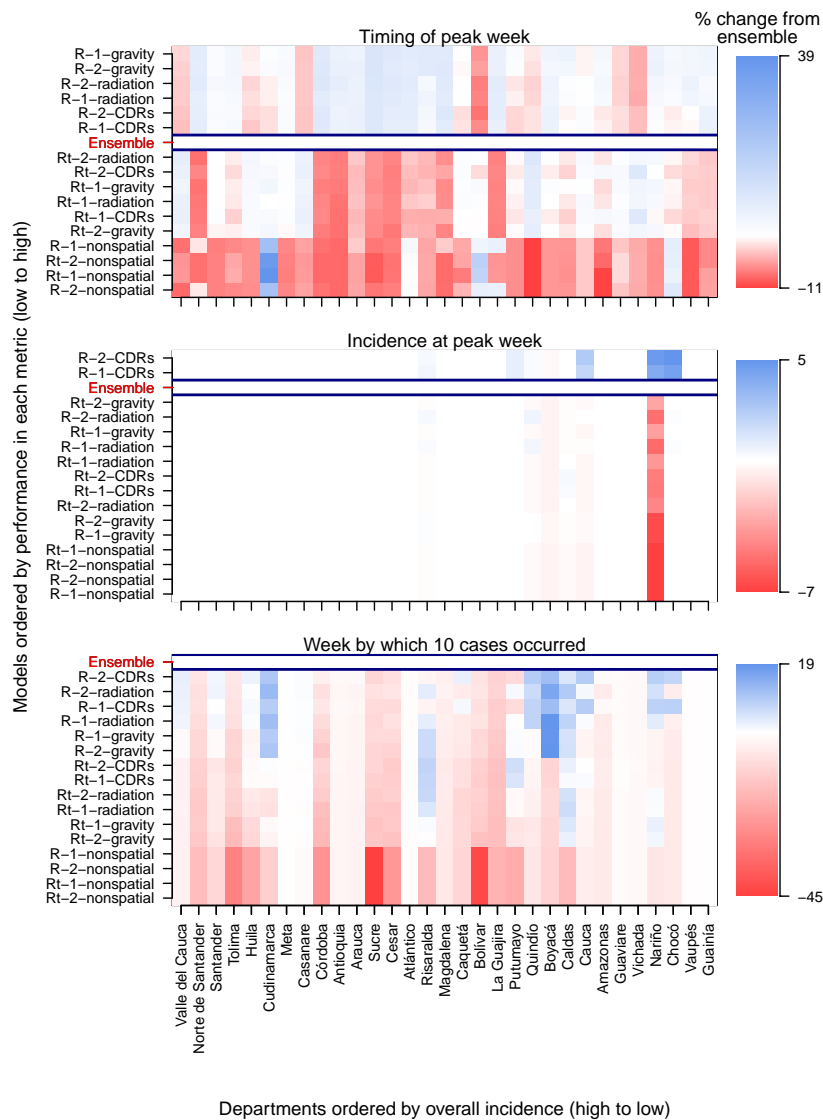

Figure 5: **Model-specific forecast scores relative to equally weighted ensemble model for each department and forecasting target.** *a.* Timing of peak week (within two weeks). *b.* Incidence at peak week. *c.* Onset week, or the week by which ten cumulative cases occurred. Forecast scores are averaged over department. Models are ordered on the y-axis by average forecast score for each forecasting target, with model names abbreviated in the same manner as Fig. 4. Departments are ordered on the x-axis from high to low for overall incidence. In the heat plot, blue indicates individual model performed better than the ensemble model in a given department, red indicates individual model performed worse than ensemble model, and white indicates individual model performed roughly the same as the ensemble model.

196 the broader suite of models buffered against shortcomings of any single transmission  
197 model.

198 In the model-specific forecast performance analysis, we identified clear temporal  
199 trends related to when models with a static  $R$  versus a dynamic  $R$  should be in-  
200 cluded in an optimally weighted ensemble. In contrast, there were no clear temporal  
201 trends in weighting regarding the assumption about the number of times the virus  
202 was introduced into the country, potentially reflecting that, even with multiple in-  
203 troductions, most transmission may have been linked to a single introduction [31].  
204 Models with a dynamic  $R$  had higher weights in the ensemble at the peak of the  
205 epidemic, while models with a static  $R$  had higher weights at the beginning and  
206 end of the epidemic. This was likely due to temporal shifts in temperature and  
207 mosquito occurrence probabilities dominating forecasts of transmission potential for  
208 the models with a dynamic  $R$ . For example, in the latter parts of the epidemic  
209 when reported cases were declining, mosquito conditions and temperature became  
210 more suitable for transmission in many departments. This caused models with a dy-  
211 namic  $R$  to forecast a resurgence in ZIKV transmission in those departments, while  
212 models with a static  $R$  forecasted a downturn in incidence that was more similar  
213 to the observed dynamics. This finding that susceptible depletion may have been  
214 more influential than temporal variation in environmental conditions for the Zika  
215 epidemic is consistent with recent findings for SARS-CoV-2 [36].

216 Through the model-specific forecast performance analysis, we also found that  
217 spatially coupled models had higher ensemble weights in the early and late stages of  
218 the epidemic, while non-spatial models had higher weights around the peak of the  
219 epidemic. The importance of including spatially coupled models in the optimally  
220 weighted ensemble early in the epidemic supports the general notion that human  
221 mobility may be particularly predictive of pathogen spread early in an epidemic [7,  
222 30, 37, 38]. In part, temporal shifts in weighting around the peak of the epidemic  
223 were due to more accurate nationally-aggregated forecasts from the non-spatial mod-  
224 els. This result was consistent with a previous modeling analysis of the invasion of  
225 chikungunya virus in Colombia, which showed that models fitted independently to  
226 sub-national time series recreated national-level patterns well when aggregated [39].  
227 A shift in ensemble weights toward non-spatial models around the peak of the epi-  
228 demic was also due to less accurate department-level forecasts from the spatially  
229 coupled models. At that point in the epidemic, prevalence was at its highest, which  
230 means that we would expect local epidemics to be more endogenously driven and  
231 less sensitive to pathogen introductions across departments.

232 In the target-oriented forecast performance analysis, we found that the equally  
233 weighted ensemble generally outperformed individual models, with a few key ex-  
234 ceptions. In the months leading up to the peak of the epidemic, spatially coupled  
235 models with a static  $R$  had slightly, but consistently, higher forecast scores with  
236 respect to peak week and onset week. Like the model-specific analysis results, this  
237 result illustrates the importance of human mobility in facilitating the spread of an  
238 emerging pathogen across a landscape [30]. Individual models outperforming the  
239 equally weighted ensemble model in the early phase of the epidemic is not wholly  
240 surprising given that non-spatial models were represented equally in that ensemble  
241 throughout the epidemic. Non-spatial models may be realistic when locations have  
242 self-sustaining epidemics, but they are not appropriate for capturing early-phase  
243 growth and its dependence on importations [40]. Another instance when individ-  
244 ual models had higher forecast scores than the equally weighted ensemble was with  
245 respect to peak week for spatially coupled models with a static  $R$  in departments

246 along the Caribbean Coast. Compared to dynamic  $R$  models, the static  $R$  models  
247 more accurately forecasted peak week in these departments (e.g., Magdalena, Cesar,  
248 Sucre), as they did not forecast a late-stage resurgence in transmission. The equal  
249 weighting of the dynamic  $R$  models in the ensemble therefore led to overall lower  
250 peak week forecast scores for the ensemble relative to static  $R$  models. Still, our  
251 results indicating that an equally weighted ensemble mostly outperformed individ-  
252 ual models adds to the growing literature highlighting the importance of ensemble  
253 methods in epidemiological forecasting [16, 17, 27, 41, 42].

254 We considered both equally and optimally weighted ensembles and found that  
255 the equally weighted ensemble had a lower root mean square error than the op-  
256 timally weighted ensemble (RMSE=0.640 and 0.705, respectively)—therefore pro-  
257 viding slightly more accurate forecasts of the observed data (Fig. S23). With the  
258 optimally weighted ensemble, which we updated at each data assimilation period,  
259 we found that model weights changed over the course of the epidemic (Fig. S17). Al-  
260 though this is intuitive given the changing nature of an emerging epidemic through  
261 time [8], it may be problematic in practice. It is almost as if the ensemble weights  
262 require their own forecast. On the one hand, promising new advances in ensem-  
263 ble modeling [27, 41]—such as adaptive stacking for seasonal influenza forecasting  
264 [43]—are being used to address this issue of identifying optimal, adaptive weights  
265 without training to historical data. On the other hand, in an emerging pathogen  
266 context, establishing optimal model weights by way of model fitting and forecast  
267 generation is often reliant on available incidence data (rather than historical data)  
268 that is highly variable [44], given the delayed nature of data reporting [45]. In this  
269 context, our results demonstrate that it is preferable to use an equally weighted en-  
270 semble to buffer against uncertainty in optimal ensemble weights. As is also being  
271 demonstrated in forecasts of COVID-19, equally weighted ensembles can provide  
272 accurate forecasts [26, 46, 44] and may be a better reflection of the considerable  
273 structural uncertainty inherent to models of emerging pathogen transmission [24].

274 A few limitations of our study should be noted. First, while an equally weighted  
275 ensemble approach allowed us to consider contributions of several alternative model  
276 assumptions, there was high uncertainty associated with these forecasts (sometimes  
277 spanning orders of magnitude, see Fig. S24). Potential end-users of these types  
278 of forecasts could consider high levels of uncertainty to be problematic for decision-  
279 making [47], though if the uncertainty does not affect the choice of a control measure,  
280 then the uncertainty may not be as relevant [48]. In the future, ensemble approaches  
281 aimed at increasing precision and reducing uncertainty [49, 27] could be used in con-  
282 junction with equally weighted ensembles. Second, we considered alternative models  
283 across only three assumptions. With ZIKV transmission, there are additional struc-  
284 tural uncertainties that could be considered, such as the role of sexual transmission  
285 [50]. In real-time applications of our or other Zika forecasting models, it could be  
286 worthwhile to explore these types of ZIKV-specific structural uncertainties. Relat-  
287 edly, the static and dynamic  $R$  had minor differences in their formulations, such  
288 that the static  $R$  also included a socioeconomic index. In future work, it could be  
289 interesting to explore if the inclusion of this time-independent variable affected the  
290 dynamic  $R$ . Third, in this analysis we did not explicitly consider delays in reporting  
291 that likely would have occurred had these forecasts been generated in real time [51].  
292 In that context, temporally aggregating data to a wider interval (e.g., at 2-week  
293 intervals rather than 1-week intervals) could potentially help mitigate the effects of  
294 reporting delays to some extent. Fourth, we assumed that the reporting probability  
295 was constant through time. Although this is a standard assumption [52] given the

296 lack of data to inform a time-varying relationship for this mechanistic element [53],  
297 it would be interesting to include and test a reporting dynamics model (e.g., the re-  
298 porting probability scales with incidence [54]) as an additional component included  
299 in our ensemble framework. Fifth, we conducted this analysis at the departmental  
300 level instead of this municipality level, which could obfuscate meaningful differences  
301 across regions of a single department [29]. In future work, it would be useful to test  
302 and assess our forecasting algorithm and outputs at different spatial scales [39].

303 As the world is reminded of on a daily basis with COVID-19, pathogen emer-  
304 gence is an ongoing phenomenon that will continue to pose threats in the future [55].  
305 A better understanding of an emerging pathogen’s natural history could help to re-  
306 duce pathogen-specific structural uncertainties, but these insights may not always  
307 occur in time to inform model development for real-time forecasting [8]. Our results  
308 highlight important trade-offs between individual and ensemble models in this con-  
309 text. Specifically, we demonstrated that an equally weighted ensemble forecast was  
310 almost always more accurate than individual models. Instances in which individ-  
311 ual models were better than the ensemble, or greatly improved the ensemble, also  
312 provided insight. For example, incorporating human mobility into models improved  
313 forecasts in the early and late phases of an epidemic, which underscores the impor-  
314 tance of making aggregated mobility data available early in an epidemic [56]. The  
315 range of outcomes resulting from alternative modeling assumptions in model-specific  
316 forecasts demonstrates why it will continue to be important to address structural  
317 uncertainties in forecasting models in the future.

## 318 4 Materials and methods

### 319 4.1 Data

320 We used passive mandatory surveillance data for reported cases of Zika, from the  
321 National Surveillance System (Sivigila) at the first administrative level (31 mainland  
322 departments) in Colombia. To span the beginning, peak, and tail of the epidemic in  
323 Colombia, we focused on the 60-week period between August 9, 2015 and October  
324 1, 2016. We used the version of these data collated by Siraj et al. [29], as well as  
325 modeled values of weekly average temperature and estimates of department-level  
326 population from that data set. For some models, we worked with monthly estimates  
327 of mosquito occurrence probability (i.e., dynamic  $R$  models) obtained from Bogoch  
328 et al. [57], and for others we worked with time-averaged estimates (i.e., static  $R$   
329 models) from Kraemer et al. [58].

330 For models that relied on cell phone data to describe human mobility, we used  
331 anonymized and aggregated call detail records (CDRs). Every time a user receives  
332 or makes a call, a CDR including the time, date, ID, and the tower (BTS) providing  
333 the service is generated. The positions of the BTSs are georeferenced and so the  
334 aggregated mobility between towers can be tracked in time. We used this information  
335 to derive daily mobility matrices at the municipality level in Colombia from February  
336 2015 to August 2015. Mobility matrices captured the number of individuals that  
337 moved in each given day from one municipality to another (i.e., that appeared  
338 in BTSs of different municipalities). The change for each day was captured by  
339 comparing the last known municipality to the current one. No individual information  
340 or records were available.

341 As these data did not align with the time frame of the epidemic, and to calcu-  
342 late a mobility matrix at a department level, we computed a representative mobility

343 matrix by summing all available CDRs within the municipalities of each department  
344 and normalizing them to sum to one relative to the sum of CDRs originating from  
345 that department. In five departments (Amazonas, Cudinamarca, Guainía, Vaupés,  
346 Vichada), the proportion of CDRs linking callers within the same department was  
347 below 60%. Given that this implied an unrealistically low proportion of time spent  
348 within an individual’s department of residence, we interpreted those values as id-  
349 iosyncrasies of the data and not representative of human mobility [59]. Thus, for  
350 those five departments, we replaced the proportion of within-department CDRs with  
351 the mean proportion of within-department CDRs from all other departments. We  
352 then re-normalized the number of CDRs originating from each department in our  
353 mobility matrix to sum to one.

## 354 4.2 Summary of models

355 To produce weekly forecasts of ZIKV transmission across Colombia, we sought to use  
356 a computationally efficient model with the flexibility to include relevant epidemiolog-  
357 ical and ecological mechanisms. We used a previously described semi-mechanistic,  
358 discrete-time, and stochastic model [60] that had been previously adapted and used  
359 to model mosquito-borne pathogen transmission [61, 62]. Using this model, we  
360 were able to account for the extended generation interval of ZIKV using overlapping  
361 pathogen generations across up to five weeks of the generation interval distribu-  
362 tion of ZIKV [62]. Furthermore, we could specify this model to be either spatially  
363 connected or non-spatial—a key assumption that we considered in our analysis.

364 We considered a suite of 16 models that spanned all combinations of four as-  
365 sumptions about human mobility across Colombia’s 31 mainland departments, two  
366 assumptions about the relationship between environmental conditions and the re-  
367 production number ( $R$ ), and two assumptions about how many times Zika virus  
368 was introduced to Colombia (Table 1). Twelve of 16 models allowed for spatial con-  
369 nectivity across departments [60], while four models were non-spatial. There were  
370 up to two steps in the transmission process: transmission across departments (for  
371 spatially connected models) and local transmission within departments.

372 Across departments, we simulated the movement of individuals using a spatial  
373 connectivity matrix ( $\mathbf{H}$ ), the  $d^{\text{th}}$  column of which corresponds to the proportion of  
374 time spent by residents of department  $d$  in all departments  $\vec{d}$ . Using this matrix, we  
375 redistributed infections in department  $d$  in week  $t$  ( $I_{d,t}$ ) across  $\vec{d}$  as a multinomial  
376 random variable,

$$I'_{\vec{d},t} \sim \text{multinomial}(I_{d,t}, \mathbf{H}_{\vec{d},d}), \quad (1)$$

377 where the first and second arguments represent the number of trials and the probabil-  
378 ities of the outcomes, respectively. By taking this Lagrangian approach to modeling  
379 human mobility, transmission across departments can occur either by infected vis-  
380 itors transmitting to local susceptibles or susceptible visitors becoming infected by  
381 local infecteds. The relative occurrence of these events depends on the prevalence  
382 of infection, susceptibility, local transmission potential, and mobility patterns of a  
383 given pair of departments.

384 Within each department, we defined a variable representing the effective number  
385 of infections that could have generated new infections in week  $t$  ( $I''_{d,t}$ ) as

$$I''_{d,t} = \sum_{j=1}^5 \omega_j^{GI} I'_{d,t-j}, \quad (2)$$

386 where  $\omega_j^{GI}$  is the probability that the generation interval is  $j$  weeks [63]. The rela-  
387 tionship between  $I''_{d,t}$  and the expected number of new local infections in week  $t + 1$   
388 ( $I_{d,t+1}$ ) follows

$$I_{d,t+1} = \beta_{d,t} \frac{I''_{d,t}}{N_d} S_{d,t}, \quad (3)$$

389 where  $\beta_{d,t}$  is the transmission coefficient,  $N_d$  is the total population, and  $S_{d,t}$  is the  
390 total susceptible population prior to local transmission in week  $t$ . We accounted for  
391 the role of stochasticity in transmission by using the stochastic analogue of Eqn. 3,  
392 such that

$$I_{d,t+1} \sim \text{negative binomial} \left( \beta_{d,t} \frac{I''_{d,t}}{N_d} S_{d,t}, I''_{d,t} \right) \quad (4)$$

393 where the first and second arguments are the mean and dispersion parameters,  
394 respectively [60].

395 To allow for comparison of the model's simulations of infections ( $I_{d,t}$ ) with empir-  
396 ical data on reported cases ( $y_{d,t}$ ), we applied a reporting probability ( $\rho$ ) to simulated  
397 infections to obtain simulated cases ( $C_{d,t}$ ), such that  $C_{d,t} \sim \text{binomial}(I_{d,t}, \rho)$ . Using  
398 this, we defined the contribution to the overall log-likelihood of the model and its  
399 parameters from a given department  $d$  and week  $t$  as

$$\ell_{d,t}(\vec{\theta}_t) = \ln(\text{negative binomial}(y_{d,t} + 1 | \phi, C_{d,t} + 1)), \quad (5)$$

400 where  $\phi$  is a dispersion parameter that we estimated to account for variability in  
401 case reporting beyond that captured by  $\rho$ . Shifting  $y_{d,t}$  and  $C_{d,t}$  by one in eq. (5)  
402 was intended to safeguard against  $\ell_{d,t}$  being undefined in situations where  $C_{d,t} = 0$ .

#### 403 4.2.1 Assumptions about human mobility

404 We allowed for spatial coupling across departments in 12 of 16 models. In these  
405 models, we informed  $\mathbf{H}$  in three alternative ways: i) with mobility data extracted  
406 from mobile phone CDRs, ii) with a gravity model, or iii) with a radiation model  
407 (Fig. 1d-f). For the gravity model, we used parameters previously fitted to CDRs  
408 from Spain and validated in West Africa [11]. For the radiation model, we calculated  
409 human mobility fluxes according to the standard formulation of this model [64],  
410 which depends only on the geographic distribution of population. In four of 16  
411 models, we assumed that departments were spatially uncoupled (Table 1), such that  
412 each department was modeled individually with its own set of parameters. In those  
413 models, each department's epidemic was seeded independently with its own set of  
414 imported infections. Further details about the spatially uncoupled models can be  
415 found in the Supplemental Text.

#### 416 4.2.2 Assumptions about environmental drivers of transmission

417 We parameterized the transmission coefficient,  $\beta_{d,t}$ , based on a description of the  
418 reproduction number,  $R_{d,t}$ , appropriate to environmental drivers for department  $d$   
419 and time  $t$ . We considered two alternative formulations of  $R_{d,t}$  that were informed  
420 by data that were available prior to the first reported case of Zika in Colombia.  
421 Specifically, both of these alternative formulations used different outputs from pre-  
422 vious modeling efforts [6, 12] and because of this they contain slightly different  
423 components. Both formulations were defined such that

$$\beta_{d,t} = kR_{d,t} \quad (6)$$



424 where  $k$  is a scalar that we estimated over the course of the epidemic to account  
425 for the unknown magnitude of ZIKV transmission in Colombia. In addition to the  
426 summary below, further details about these formulations of  $R_{d,t}$  are provided in the  
427 Supplementary Methods.

428 The formulation of  $\beta_{d,t}$  that we refer to as “dynamic” is defined at each time  
429  $t$  in response to average temperature at that time ( $T_{d,t}$ ) and mosquito occurrence  
430 probability at that time ( $OP_{d,t}$ ). This relationship can be expressed generically as

$$\beta_{d,t} = k\tilde{R}_{d,t}(T_{d,t}, OP_{d,t}|c, \psi, \alpha, v), \quad (7)$$

431 where  $c$ ,  $\psi$ ,  $\alpha$ , and  $v$  are parameters governing the relationship among  $T_{d,t}$ ,  $OP_{d,t}$ ,  
432 and  $\tilde{R}_{d,t}$ . We informed the component of  $\tilde{R}_{d,t}$  related to mosquito density with  
433 monthly estimates of  $OP_{d,t}$ , which derive from geostatistical modeling of *Aedes ae-*  
434 *gypti* occurrence records globally [57]. Other components of  $\tilde{R}_{d,t}$ , which include  
435 several temperature-dependent transmission parameters, were informed by labora-  
436 tory estimates [12]. Given that this formulation of  $\tilde{R}_{d,t}$  was not validated against  
437 field data prior to the Zika epidemic in Colombia, we estimated values of  $c$ ,  $\psi$ ,  $\alpha$ ,  
438 and  $v$  over the course of the epidemic.

439 The formulation of  $\beta_{d,t}$  that we refer to as “static” is defined as a time-averaged  
440 value that is constant across all times  $t$ . Temporal variation in  $T_{d,t}$  is still accounted  
441 for, but its time-varying effect on  $R_{d,t}$  is averaged out over all times  $\vec{t}$  to result  
442 in a temporally constant  $R_d$ . Mosquito occurrence probability is also incorporated  
443 through a temporally constant value ( $OP_d$ ) [58]. The relationship among these  
444 variables can be expressed generically as

$$\beta_{d,t} = k\bar{R}_d(T_{d,\vec{t}}, OP_d, PPP_d), \quad (8)$$

445 where  $PPP_d$  is purchasing power parity in department  $d$  (a feature not included in  
446 the dynamic model) [65]. This input is an economic index that was intended to serve  
447 as a proxy for spatial variation in conditions that could affect exposure to mosquito  
448 biting, such as housing quality or air conditioning use [6]. Given that this formula-  
449 tion of  $\bar{R}_d$  was informed by data from outbreaks of Zika and chikungunya prior to  
450 the Zika epidemic in Colombia, we did not estimate its underlying parameters over  
451 the course of the epidemic in Colombia.

### 452 4.2.3 Assumptions about introduction events

453 Although many ZIKV infections were likely imported into Colombia throughout the  
454 epidemic, we assumed that ZIKV introductions into either one or two departments  
455 drove the establishment of ZIKV in Colombia [31]. Under the two different sce-  
456 narios, there was either one introduction event into one department or there were  
457 two independent introduction events into two randomly drawn departments. For  
458 each parameter set, the initial number of imported infections was seeded randomly  
459 between one and five in a single week, the timing of which was estimated as a pa-  
460 rameter. Following the initial introduction(s), we assumed that ZIKV transmission  
461 was driven by a combination of movement of infected people among departments  
462 and local transmission within departments, as specified by each model.

## 463 4.3 Data assimilation and forecasting

464 For each particle, we produced a single forecast to “initialize” the model prior to  
465 the first reported case in Colombia. Beginning with the time of the first reported

466 case in Colombia, we then assimilated new data, updated parameter estimates,  
 467 and generated forecasts every four weeks, consistent with the four-week frequency  
 468 used by Johansson et al. in an evaluation of dengue forecasts [16]. We specified  
 469 20,000 initial parameter sets ( $\vec{\theta}_{1,n}$ ), indexed by  $n$ , by drawing independent samples  
 470 from prior distributions of each parameter [66] (see Supplemental Methods). Each  
 471 parameter set was used to generate a corresponding particle: a stochastic realization  
 472 of the state variables ( $I_{d,1,n}$  and  $C_{d,1,n}$ ). At each assimilation period, we normalized  
 473 log-likelihoods summed across departments over the preceding four weeks to generate  
 474 particle weights,

$$\omega(t, n) = \frac{\sum_d \sum_{\tau=t-3}^t \ell_{d,\tau}(\vec{\theta}_{t,n})}{\sum_n \sum_d \sum_{\tau=t-3}^t \ell_{d,\tau}(\vec{\theta}_{t,n})}. \quad (9)$$

475 Proportional to these particle weights ( $\omega(t, n)$ ), we sampled 18,000 sets of corre-  
 476 sponding parameters ( $\vec{\theta}_t^{\text{resampled}}$ ) and state variables ( $\{\mathbf{I}_{d,t}^{\text{resampled}}, \mathbf{C}_{d,t}^{\text{resampled}}\}$ ) from  
 477 time  $t$  with replacement and used them at the next data assimilation step four  
 478 weeks later, where boldface indicates a set of parameters or state variables, respec-  
 479 tively, over all  $n$ . In doing so, information including the initial prior assumptions  
 480 ( $\vec{\theta}_{1,n}$ ) and the likelihoods at each four-week period was assimilated into the model  
 481 sequentially over time. Given that particle filtering algorithms are susceptible to  
 482 particle drift—or the convergence of particles onto very few states through iter-  
 483 ative re-sampling [33]—we also generated 2,000 new parameter sets at each data  
 484 assimilation step. To do so, we drew random samples of model parameters from  
 485 a multivariate normal distribution with parameter means and covariances fitted to  
 486 the resampled 18,000 parameter sets ( $\vec{\theta}_t^{\text{resampled}}$ ). Whereas the 18,000 resampled  
 487 parameter sets already included simulated values of state variables  $I_{d,t,n}$  and  $C_{d,t,n}$   
 488 through time  $t$ , the 2,000 new parameter sets did not and so we informed initial  
 489 conditions of  $\mathbf{I}_{d,t}^{\text{new}}$  with draws from  $\mathbf{I}_{d,\nu,t}^{\text{resampled}}$  for those parameter sets at the time  
 490 they were created. Together, the 18,000 resampled parameter sets ( $\vec{\theta}_t^{\text{resampled}}$ ) and  
 491 the 2,000 new parameter sets ( $\vec{\theta}_t^{\text{new}}$ ) constituted the set of parameter sets used as  
 492 input for the next data assimilation step ( $\vec{\theta}_{t+4} = \{\vec{\theta}_t^{\text{resampled}}, \vec{\theta}_t^{\text{new}}\}$ ). We also used  
 493 this new set of parameters as the basis for forecasts made at time  $t$ , which simply  
 494 involved simulating forward a single realization of the model for each parameter set.

#### 495 4.4 Evaluating forecast performance

496 At each of the 15 time points at which we performed data assimilation through the  
 497 60-week forecasting period, we created an ensemble forecast that evenly weighted  
 498 contributions from each of the 16 models [46]. To populate this ensemble, we spec-  
 499 ified 20,000 total samples, with 1,250 samples from each model. We assessed the  
 500 model-specific performance of individual and ensemble forecasts using log scores,  
 501 which are forecast scoring rules that assess both the precision and accuracy of fore-  
 502 casts [67]. For a specific forecasting target,  $z$ , and model,  $m$ , the log score is defined  
 503 as  $\log f_m(z^*|\mathbf{x})$ , where  $f_m(z|\mathbf{x})$  is the predicted density conditioned on the data,  $\mathbf{x}$ ,  
 504 and  $z^*$  is the empirical value of the target  $Z$  [16].

505 We computed log scores for departmental and national incidence over each four-  
 506 week assimilation period. Following [17], we used an expectation-maximization al-  
 507 gorithm to generate ensemble weights for each model in each assimilation period.  
 508 For each model, we computed 32 log scores (i.e., one for each department and one

509 nationally). To compute the ensemble weight for a given model feature, such as the  
510 static  $R$  assumption, we summed the weights of all models with that feature.

511 We assessed target-oriented forecast performance using log scores for three fore-  
512 casting targets: timing of peak week (within two weeks), incidence at peak week,  
513 and onset week, which we defined as the week by which ten cumulative cases oc-  
514 curred. These choices were motivated by forecasting assessments for influenza and  
515 dengue [16, 17, 18, 68] and deemed applicable to public health objectives for fore-  
516 casting an emerging pathogen such as Zika. For peak week and onset week, we used  
517 modified log scores [18], such that predictions within two weeks of the correct week  
518 were considered accurate. We evaluated a total of 7,680 log scores, reflecting three  
519 targets for each of 16 models in each of 31 departments plus at the national level  
520 and at each of 15 time points at which data assimilation occurred.

521 As log scores only yield a relative measure of model performance, we used fore-  
522 casting scores [18] as a way to retrospectively compare forecast performance for  
523 different forecasting targets. Whereas log scores are preferable for comparing per-  
524 formance across models on the same data, forecasting scores are preferable for com-  
525 paring forecast performance across data composed of different locations and times.  
526 A forecasting score is defined simply as the exponential of the average log score,  
527 where the latter reflects an average over one or more indices, such as models, time  
528 points, targets, or locations.

## 529 Data availability

530 The mobile phone data set used in this study is proprietary and subject to strict  
531 privacy regulations. The access to this data set was granted after reaching a non-  
532 disclosure agreement with the proprietor, who anonymized and aggregated the orig-  
533 inal data before giving access to the authors. The data could be available on request  
534 after negotiation of a non-disclosure agreement. The contact person is Enrique Frías-  
535 Martínez ([enrique.friasmartinez@telefonica.com](mailto:enrique.friasmartinez@telefonica.com)). Epidemiological, meteorological,  
536 and demographic data are available from Siraj et al. [29] and additionally available  
537 on [https://github.com/roidtman/eid\\_ensemble\\_forecasting](https://github.com/roidtman/eid_ensemble_forecasting).

## 538 Author contributions

539 RJO, EO, MUGK, CMB, MAJ, CAM, RCR, IR-B, MG-H, and TAP conceptual-  
540 ized the study; RJO, EO, MUGK, CAC-O, EC-R, AM-C, PC, LER, VC, PA, GE,  
541 JHH, SCH, ASS, EF-M, and MG-H provided and / or processed data; RJO, EO,  
542 MUGK, CA-O, EC-R, SM-C, PC, LER, VC, PA, EF-M, MG-H, and TAP partic-  
543 ipated in biweekly meetings to provide feedback on research; RJO, EO, MUGK,  
544 MG-H, and TAP developed the model and wrote the first draft of the manuscript;  
545 RJO, EO, MUGK, JHH, and SCH analyzed data; EO, MG-H, and TAP supervised  
546 the research; all authors reviewed the manuscript.

## 547 Acknowledgements

548 The authors would like to thank Clara Palau Montava for help with managing  
549 the early stages of this project. The authors would additionally like to thank the  
550 UNICEF-Colombia Representative, Aida Oliver Arostegui, INS Director, Martha

551 Lucia Ospina Martinez, and the past and present Ministers of the Ministry of Health,  
552 Juan Pablo Uribe Restrepo and Fernando Ruiz Gomez.

553 RJO acknowledges support from an Eck Institute for Global Health Fellowship,  
554 GLOBES grant, Arthur J. Schmitt Fellowship, and the UNICEF Office of Innova-  
555 tion. MUGK is supported by The Branco Weiss Fellowship - Society in Science,  
556 administered by the ETH Zurich and acknowledges funding from the Oxford Martin  
557 School and the European Union Horizon 2020 project MOOD (#874850). SCH is  
558 supported by the Wellcome Trust (220414/Z/20/Z). This research was funded in  
559 whole, or in part, by the Wellcome Trust [Grant number 220414/Z/20/Z]. For the  
560 purpose of open access, the author has applied a CC BY public copyright licence to  
561 any Author Accepted Manuscript version arising from this submission

## References

- [1] Kate E. Jones et al. “Global trends in emerging infectious diseases”. In: *Nature* 451.7181 (Feb. 2008), pp. 990–993. ISSN: 1476-4687. DOI: [10.1038/nature06536](https://doi.org/10.1038/nature06536). URL: <https://doi.org/10.1038/nature06536>.
- [2] Katherine F. Smith et al. “Global rise in human infectious disease outbreaks”. In: *Journal of The Royal Society Interface* 11.101 (2014), p. 20140950. DOI: [10.1098/rsif.2014.0950](https://doi.org/10.1098/rsif.2014.0950). URL: <https://royalsocietypublishing.org/doi/abs/10.1098/rsif.2014.0950>.
- [3] Juliet Bedford et al. “A new twenty-first century science for effective epidemic response”. In: *Nature* 575.7781 (Nov. 2019), pp. 130–136. DOI: [10.1038/s41586-019-1717-y](https://doi.org/10.1038/s41586-019-1717-y). URL: <https://doi.org/10.1038/s41586-019-1717-y>.
- [4] Giovanni Lo Iacono et al. “Using modelling to disentangle the relative contributions of zoonotic and anthroponotic transmission: the case of Lassa fever”. In: *PLOS Neglected Tropical Diseases* 9.1 (Jan. 2015), pp. 1–13. DOI: [10.1371/journal.pntd.0003398](https://doi.org/10.1371/journal.pntd.0003398). URL: <https://doi.org/10.1371/journal.pntd.0003398>.
- [5] Thomas C Quinn. “Global burden of the HIV pandemic”. In: *The Lancet* 348.9020 (1996), pp. 99–106. ISSN: 0140-6736. DOI: [https://doi.org/10.1016/S0140-6736\(96\)01029-X](https://doi.org/10.1016/S0140-6736(96)01029-X). URL: <http://www.sciencedirect.com/science/article/pii/S014067369601029X>.
- [6] T. Alex Perkins et al. “Model-based projections of Zika virus infections in childbearing women in the Americas”. In: *Nature Microbiology* 1.9 (2016), p. 16126. DOI: [10.1038/nmicrobiol.2016.126](https://doi.org/10.1038/nmicrobiol.2016.126). URL: <https://doi.org/10.1038/nmicrobiol.2016.126>.
- [7] Moritz U. G. Kraemer et al. “Spread of yellow fever virus outbreak in Angola and the Democratic Republic of the Congo 2015-2016: a modelling study”. In: *The Lancet Infectious Diseases* 17.3 (Mar. 2017), pp. 330–338. DOI: [10.1016/S1473-3099\(16\)30513-8](https://doi.org/10.1016/S1473-3099(16)30513-8). URL: [https://doi.org/10.1016/S1473-3099\(16\)30513-8](https://doi.org/10.1016/S1473-3099(16)30513-8).
- [8] C. Jessica E. Metcalf and Justin Lessler. “Opportunities and challenges in modeling emerging infectious diseases”. In: *Science* 357.6347 (2017), pp. 149–152. DOI: [10.1126/science.aam8335](https://doi.org/10.1126/science.aam8335). URL: <https://science.sciencemag.org/content/357/6347/149>.

- [9] J. O. Lloyd-Smith et al. “Superspreading and the effect of individual variation on disease emergence”. In: *Nature* 438.7066 (Nov. 2005), pp. 355–359. ISSN: 1476-4687. DOI: [10.1038/nature04153](https://doi.org/10.1038/nature04153). URL: <https://doi.org/10.1038/nature04153>.
- [10] Amy Wesolowski et al. “Impact of human mobility on the emergence of dengue epidemics in Pakistan”. In: *Proceedings of the National Academy of Sciences* 112.38 (2015), pp. 11887–11892. DOI: [10.1073/pnas.1504964112](https://doi.org/10.1073/pnas.1504964112). URL: <https://www.pnas.org/content/112/38/11887>.
- [11] M. U. G. Kraemer et al. “Utilizing general human movement models to predict the spread of emerging infectious diseases in resource poor settings”. In: *Scientific Reports* 9.1 (2019), p. 5151. ISSN: 2045-2322. DOI: [10.1038/s41598-019-41192-3](https://doi.org/10.1038/s41598-019-41192-3).
- [12] Erin A. Mordecai et al. “Detecting the impact of temperature on transmission of Zika, dengue, and chikungunya using mechanistic models”. In: *PLOS Neglected Tropical Diseases* 11.4 (Apr. 2017), pp. 1–18. DOI: [10.1371/journal.pntd.0005568](https://doi.org/10.1371/journal.pntd.0005568). URL: <https://doi.org/10.1371/journal.pntd.0005568>.
- [13] Birgit Nikolay et al. “Transmission of Nipah Virus — 14 Years of Investigations in Bangladesh”. In: *New England Journal of Medicine* 380.19 (2019). PMID: 31067370, pp. 1804–1814. DOI: [10.1056/NEJMoa1805376](https://doi.org/10.1056/NEJMoa1805376). URL: <https://doi.org/10.1056/NEJMoa1805376>.
- [14] Gytis Dudas et al. “MERS-CoV spillover at the camel-human interface”. In: *eLife* 7 (Jan. 2018), e31257. ISSN: 2050-084X. DOI: [10.7554/eLife.31257](https://doi.org/10.7554/eLife.31257). URL: <https://doi.org/10.7554/eLife.31257>.
- [15] Katriona Shea et al. “Harnessing multiple models for outbreak management”. In: *Science* 368.6491 (2020), pp. 577–579. DOI: [10.1126/science.abb9934](https://doi.org/10.1126/science.abb9934). URL: <https://science.sciencemag.org/content/368/6491/577>.
- [16] Michael A. Johansson et al. “An open challenge to advance probabilistic forecasting for dengue epidemics”. In: *Proceedings of the National Academy of Sciences* 116.48 (2019), pp. 24268–24274. DOI: [10.1073/pnas.1909865116](https://doi.org/10.1073/pnas.1909865116). URL: <https://www.pnas.org/content/116/48/24268>.
- [17] Nicholas G. Reich et al. “Accuracy of real-time multi-model ensemble forecasts for seasonal influenza in the U.S.” In: *PLOS Computational Biology* 15.11 (Nov. 2019), pp. 1–19. DOI: [10.1371/journal.pcbi.1007486](https://doi.org/10.1371/journal.pcbi.1007486). URL: <https://doi.org/10.1371/journal.pcbi.1007486>.
- [18] Nicholas G. Reich et al. “A collaborative multiyear, multimodel assessment of seasonal influenza forecasting in the United States”. In: *Proceedings of the National Academy of Sciences* 116.8 (2019), pp. 3146–3154. DOI: [10.1073/pnas.1812594116](https://doi.org/10.1073/pnas.1812594116). URL: <https://www.pnas.org/content/116/8/3146>.
- [19] Craig J. McGowan et al. “Collaborative efforts to forecast seasonal influenza in the United States, 2015–2016”. In: *Scientific Reports* 9.1 (Jan. 2019), p. 683. DOI: [10.1038/s41598-018-36361-9](https://doi.org/10.1038/s41598-018-36361-9). URL: <https://doi.org/10.1038/s41598-018-36361-9>.
- [20] Leah R. Johnson et al. “Phenomenological forecasting of disease incidence using heteroskedastic Gaussian processes: A dengue case study”. In: *The Annals of Applied Statistics* 12.1 (2018), pp. 27–66. DOI: [10.1214/17-AOAS1090](https://doi.org/10.1214/17-AOAS1090). URL: <https://doi.org/10.1214/17-AOAS1090>.

- [21] Sara Y. Del Valle et al. “Summary results of the 2014-2015 DARPA Chikungunya challenge”. In: *BMC Infectious Diseases* 18.1 (May 2018), p. 245. DOI: [10.1186/s12879-018-3124-7](https://doi.org/10.1186/s12879-018-3124-7). URL: <https://doi.org/10.1186/s12879-018-3124-7>.
- [22] Cécile Viboud et al. “The RAPIDD ebola forecasting challenge: Synthesis and lessons learnt”. In: *Epidemics* 22 (2018). The RAPIDD Ebola Forecasting Challenge, pp. 13–21. DOI: <https://doi.org/10.1016/j.epidem.2017.08.002>. URL: <http://www.sciencedirect.com/science/article/pii/S1755436517301275>.
- [23] ZIKAVAT Collaboration et al. “Preliminary results of models to predict areas in the Americas with increased likelihood of Zika virus transmission in 2017”. In: *bioRxiv* (2017). DOI: [10.1101/187591](https://doi.org/10.1101/187591). URL: <https://www.biorxiv.org/content/early/2017/09/29/187591>.
- [24] Katriona Shea et al. “COVID-19 reopening strategies at the county level in the face of uncertainty: Multiple Models for Outbreak Decision Support”. In: *medRxiv* (2020). DOI: [10.1101/2020.11.03.20225409](https://doi.org/10.1101/2020.11.03.20225409). URL: <https://www.medrxiv.org/content/early/2020/11/05/2020.11.03.20225409>.
- [25] Dylan B. George et al. “Technology to advance infectious disease forecasting for outbreak management”. In: *Nature Communications* 10.1 (Sept. 2019), p. 3932. ISSN: 2041-1723. DOI: [10.1038/s41467-019-11901-7](https://doi.org/10.1038/s41467-019-11901-7). URL: <https://doi.org/10.1038/s41467-019-11901-7>.
- [26] Evan L Ray et al. “Ensemble Forecasts of Coronavirus Disease 2019 (COVID-19) in the U.S.” In: *medRxiv* (2020). DOI: [10.1101/2020.08.19.20177493](https://doi.org/10.1101/2020.08.19.20177493). URL: <https://www.medrxiv.org/content/early/2020/08/22/2020.08.19.20177493>.
- [27] Logan C. Brooks et al. “Nonmechanistic forecasts of seasonal influenza with iterative one-week-ahead distributions”. In: *PLOS Computational Biology* 14.6 (June 2018), pp. 1–29. DOI: [10.1371/journal.pcbi.1006134](https://doi.org/10.1371/journal.pcbi.1006134). URL: <https://doi.org/10.1371/journal.pcbi.1006134>.
- [28] G. Chowell et al. “Real-time forecasting of epidemic trajectories using computational dynamic ensembles”. In: *Epidemics* 30 (2020), p. 100379. ISSN: 1755-4365. DOI: <https://doi.org/10.1016/j.epidem.2019.100379>. URL: <http://www.sciencedirect.com/science/article/pii/S1755436519301112>.
- [29] Amir S. Siraj et al. “Spatiotemporal incidence of Zika and associated environmental drivers for the 2015-2016 epidemic in Colombia”. In: *Scientific Data* 5.1 (2018), p. 180073. DOI: [10.1038/sdata.2018.73](https://doi.org/10.1038/sdata.2018.73). URL: <https://doi.org/10.1038/sdata.2018.73>.
- [30] Moritz U. G. Kraemer et al. “The effect of human mobility and control measures on the COVID-19 epidemic in China”. In: *Science* 368.6490 (2020), pp. 493–497. DOI: [10.1126/science.abb4218](https://doi.org/10.1126/science.abb4218). URL: <https://science.sciencemag.org/content/368/6490/493>.
- [31] Allison Black et al. “Genomic epidemiology supports multiple introductions and cryptic transmission of Zika virus in Colombia”. In: *BMC Infectious Diseases* 19.1 (2019), p. 963. DOI: [10.1186/s12879-019-4566-2](https://doi.org/10.1186/s12879-019-4566-2). URL: <https://doi.org/10.1186/s12879-019-4566-2>.
- [32] Roni Rosenfeld. *The EM Algorithm*. 1997. URL: <http://www.cs.cmu.edu/afs/cs.cmu.edu/academic/class/11761-s97/WWW/tex/EM.ps>.

- [33] Michael C. Dietze. *Ecological Forecasting*. Princeton University Press, 2017. ISBN: 9780691160573. URL: <http://www.jstor.org/stable/j.ctvc7796h>.
- [34] Nicholas B. DeFelice et al. “Ensemble forecast of human West Nile virus cases and mosquito infection rates”. In: *Nature Communications* 8.1 (Feb. 2017), p. 14592. ISSN: 2041-1723. DOI: [10.1038/ncomms14592](https://doi.org/10.1038/ncomms14592). URL: <https://doi.org/10.1038/ncomms14592>.
- [35] Wan Yang, Alicia Karspeck, and Jeffrey Shaman. “Comparison of Filtering Methods for the Modeling and Retrospective Forecasting of Influenza Epidemics”. In: *PLOS Computational Biology* 10.4 (Apr. 2014), pp. 1–15. DOI: [10.1371/journal.pcbi.1003583](https://doi.org/10.1371/journal.pcbi.1003583). URL: <https://doi.org/10.1371/journal.pcbi.1003583>.
- [36] Rachel E. Baker et al. “Susceptible supply limits the role of climate in the early SARS-CoV-2 pandemic”. In: *Science* 369.6501 (2020), pp. 315–319. DOI: [10.1126/science.abc2535](https://science.sciencemag.org/content/369/6501/315). URL: <https://science.sciencemag.org/content/369/6501/315>.
- [37] S. Cauchemez et al. “Local and regional spread of chikungunya fever in the Americas”. In: *Euro surveillance* 19.28 (2014), pp. 20854–20854. ISSN: 1560-7917. DOI: [10.2807/1560-7917.es2014.19.28.20854](https://pubmed.ncbi.nlm.nih.gov/25060573). URL: <https://pubmed.ncbi.nlm.nih.gov/25060573>.
- [38] Michael A. Johansson et al. “Nowcasting the Spread of Chikungunya Virus in the Americas”. In: *PLOS ONE* 9.8 (Aug. 2014), pp. 1–8. DOI: [10.1371/journal.pone.0104915](https://doi.org/10.1371/journal.pone.0104915). URL: <https://doi.org/10.1371/journal.pone.0104915>.
- [39] Sean M. Moore et al. “Local and regional dynamics of chikungunya virus transmission in Colombia: the role of mismatched spatial heterogeneity”. In: *BMC Medicine* 16.1 (Aug. 2018), p. 152. ISSN: 1741-7015. DOI: [10.1186/s12916-018-1127-2](https://doi.org/10.1186/s12916-018-1127-2). URL: <https://doi.org/10.1186/s12916-018-1127-2>.
- [40] Shengjie Lai et al. “Seasonal and interannual risks of dengue introduction from South-East Asia into China, 2005-2015”. In: *PLOS Neglected Tropical Diseases* 12.11 (Nov. 2018), pp. 1–16. DOI: [10.1371/journal.pntd.0006743](https://doi.org/10.1371/journal.pntd.0006743). URL: <https://doi.org/10.1371/journal.pntd.0006743>.
- [41] Tom Lindström, Michael Tildesley, and Colleen Webb. “A Bayesian ensemble approach for epidemiological projections”. In: *PLOS Computational Biology* 11.4 (Apr. 2015), pp. 1–30. DOI: [10.1371/journal.pcbi.1004187](https://doi.org/10.1371/journal.pcbi.1004187). URL: <https://doi.org/10.1371/journal.pcbi.1004187>.
- [42] Teresa K. Yamana, Sasikiran Kandula, and Jeffrey Shaman. “Superensemble forecasts of dengue outbreaks”. In: *Journal of The Royal Society Interface* 13.123 (2016), p. 20160410. DOI: [10.1098/rsif.2016.0410](https://royalsocietypublishing.org/doi/abs/10.1098/rsif.2016.0410). URL: <https://royalsocietypublishing.org/doi/abs/10.1098/rsif.2016.0410>.
- [43] Thomas McAndrew and Nicholas G. Reich. *Adaptively stacking ensembles for influenza forecasting with incomplete data*. 2020. arXiv: [1908.01675](https://arxiv.org/abs/1908.01675) [stat.AP].
- [44] Evan L. Ray et al. “Challenges in training ensembles to forecast COVID-19 cases and deaths in the United States”. In: *International Institute of Forecasters* (2021). URL: <https://forecasters.org/blog/2021/04/09/challenges-in-training-ensembles-to-forecast-covid-19-cases-and-deaths-in-the-united-states/>.

- [45] T. Alex Perkins et al. “Estimating unobserved SARS-CoV-2 infections in the United States”. In: *Proceedings of the National Academy of Sciences* 117.36 (2020), pp. 22597–22602. ISSN: 0027-8424. DOI: [10.1073/pnas.2005476117](https://doi.org/10.1073/pnas.2005476117). eprint: <https://www.pnas.org/content/117/36/22597.full.pdf>.
- [46] Thomas McAndrew et al. “Aggregating predictions from experts: A review of statistical methods, experiments, and applications”. In: *WIREs Computational Statistics* (), e1514. DOI: [10.1002/wics.1514](https://doi.org/10.1002/wics.1514). URL: <https://onlinelibrary.wiley.com/doi/abs/10.1002/wics.1514>.
- [47] Korryn Bodner, Marie-Josée Fortin, and Péter K. Molnár. “Making predictive modelling ART: accurate, reliable, and transparent”. In: *Ecosphere* 11.6 (2020), e03160. DOI: [10.1002/ecs2.3160](https://doi.org/10.1002/ecs2.3160). URL: <https://esajournals.onlinelibrary.wiley.com/doi/abs/10.1002/ecs2.3160>.
- [48] Shou-Li Li et al. “Essential information: Uncertainty and optimal control of Ebola outbreaks”. In: *Proceedings of the National Academy of Sciences* 114.22 (2017), pp. 5659–5664. ISSN: 0027-8424. DOI: [10.1073/pnas.1617482114](https://doi.org/10.1073/pnas.1617482114). eprint: <https://www.pnas.org/content/114/22/5659.full.pdf>. URL: <https://www.pnas.org/content/114/22/5659>.
- [49] Sen Pei and Jeffrey Shaman. “Counteracting structural errors in ensemble forecast of influenza outbreaks”. In: *Nature Communications* 8.1 (Oct. 2017), p. 925. ISSN: 2041-1723. DOI: [10.1038/s41467-017-01033-1](https://doi.org/10.1038/s41467-017-01033-1). URL: <https://doi.org/10.1038/s41467-017-01033-1>.
- [50] Antoine Allard et al. “The risk of sustained sexual transmission of Zika is underestimated”. In: *PLOS Pathogens* 13.9 (Sept. 2017), pp. 1–12. DOI: [10.1371/journal.ppat.1006633](https://doi.org/10.1371/journal.ppat.1006633). URL: <https://doi.org/10.1371/journal.ppat.1006633>.
- [51] Axel Bonačić Marinović et al. “Quantifying Reporting Timeliness to Improve Outbreak Control”. In: *Emerging Infectious Disease journal* 21.2 (2015), p. 209. DOI: [10.3201/eid2102.130504](https://doi.org/10.3201/eid2102.130504). URL: <https://doi.org/10.3201/eid2102.130504>.
- [52] Matt J. Keeling and Pejman Rohani. *Modeling Infectious Diseases in Humans and Animals*. Princeton University Press, 2008. ISBN: 9780691116174. URL: <http://www.jstor.org/stable/j.ctvc4m4gk0>.
- [53] LT Figueiredo, SM Cavalcante, and MC Simões. “Dengue serologic survey of schoolchildren in Rio de Janeiro, Brazil, in 1986 and 1987”. In: *Bull Pan Am Health Organ.* 24.2 (1990), pp. 217–225. URL: <https://iris.paho.org/bitstream/handle/10665.2/27164/ev24n2p217.pdf?sequence=1>.
- [54] Jue Tao Lim et al. “Time varying methods to infer extremes in dengue transmission dynamics”. In: *PLOS Computational Biology* 16.10 (Oct. 2020), pp. 1–19. DOI: [10.1371/journal.pcbi.1008279](https://doi.org/10.1371/journal.pcbi.1008279). URL: <https://doi.org/10.1371/journal.pcbi.1008279>.
- [55] Honglei Sun et al. “Prevalent Eurasian avian-like H1N1 swine influenza virus with 2009 pandemic viral genes facilitating human infection”. In: *Proceedings of the National Academy of Sciences* (2020). ISSN: 0027-8424. DOI: [10.1073/pnas.1921186117](https://doi.org/10.1073/pnas.1921186117). eprint: <https://www.pnas.org/content/early/2020/06/23/1921186117.full.pdf>. URL: <https://www.pnas.org/content/early/2020/06/23/1921186117>.



- [56] Caroline O. Buckee et al. “Aggregated mobility data could help fight COVID-19”. In: *Science* 368.6487 (2020), pp. 145–146. DOI: [10.1126/science.abb8021](https://doi.org/10.1126/science.abb8021). URL: <https://science.sciencemag.org/content/368/6487/145.2>.
- [57] Isaac I. Bogoch et al. “Potential for Zika virus introduction and transmission in resource-limited countries in Africa and the Asia-Pacific region: a modelling study”. eng. In: *The Lancet. Infectious diseases* 16.11 (Nov. 2016), pp. 1237–1245. DOI: [10.1016/S1473-3099\(16\)30270-5](https://doi.org/10.1016/S1473-3099(16)30270-5). URL: [https://doi.org/10.1016/S1473-3099\(16\)30270-5](https://doi.org/10.1016/S1473-3099(16)30270-5).
- [58] Moritz UG Kraemer et al. “The global distribution of the arbovirus vectors *Aedes aegypti* and *Ae. albopictus*”. In: *eLife* 4 (June 2015), e08347. ISSN: 2050-084X. DOI: [10.7554/eLife.08347](https://doi.org/10.7554/eLife.08347). URL: <https://doi.org/10.7554/eLife.08347>.
- [59] Amy Wesolowski et al. “Heterogeneous mobile phone ownership and usage patterns in Kenya”. In: *PLOS ONE* 7.4 (Apr. 2012), pp. 1–6. DOI: [10.1371/journal.pone.0035319](https://doi.org/10.1371/journal.pone.0035319). URL: <https://doi.org/10.1371/journal.pone.0035319>.
- [60] Yingcun Xia, Ottar N. Bjørnstad, and Bryan T. Grenfell. “Measles metapopulation dynamics: A gravity model for epidemiological coupling and dynamics”. English (US). In: *American Naturalist* 164.2 (Aug. 2004), pp. 267–281. ISSN: 0003-0147. DOI: [10.1086/422341](https://doi.org/10.1086/422341).
- [61] Rachel J. Oidtman et al. “Inter-annual variation in seasonal dengue epidemics driven by multiple interacting factors in Guangzhou, China”. In: *Nature Communications* 10.1 (Mar. 2019). DOI: [10.1038/s41467-019-09035-x](https://doi.org/10.1038/s41467-019-09035-x). URL: <https://doi.org/10.1038/s41467-019-09035-x>.
- [62] T.A. Perkins et al. “Estimating drivers of autochthonous transmission of chikungunya virus in its invasion of the Americas”. In: *PLOS Currents Outbreaks* (2017). DOI: [10.1371/currents.outbreaks.a4c7b6ac10e0420b1788c9767946d1fc](https://doi.org/10.1371/currents.outbreaks.a4c7b6ac10e0420b1788c9767946d1fc).
- [63] Amir S. Siraj et al. “Temperature modulates dengue virus epidemic growth rates through its effects on reproduction numbers and generation intervals”. In: *PLOS Neglected Tropical Diseases* 11.7 (July 2017), pp. 1–19. DOI: [10.1371/journal.pntd.0005797](https://doi.org/10.1371/journal.pntd.0005797). URL: <https://doi.org/10.1371/journal.pntd.0005797>.
- [64] Filippo Simini et al. “A universal model for mobility and migration patterns”. In: *Nature* 484.7392 (2012), pp. 96–100. ISSN: 1476-4687. DOI: [10.1038/nature10856](https://doi.org/10.1038/nature10856). URL: <https://doi.org/10.1038/nature10856>.
- [65] William D. Nordhaus. “Geography and macroeconomics: New data and new findings”. In: *Proceedings of the National Academy of Sciences* 103.10 (2006), pp. 3510–3517. ISSN: 0027-8424. DOI: [10.1073/pnas.0509842103](https://doi.org/10.1073/pnas.0509842103). eprint: <https://www.pnas.org/content/103/10/3510.full.pdf>. URL: <https://www.pnas.org/content/103/10/3510>.
- [66] M. Sanjeev Arulampalam et al. “A tutorial on particle filters for online nonlinear/non-gaussian Bayesian tracking”. In: *IEEE Transactions on Signal Processing* 50.4 (Feb. 2002), pp. 174–188.

- [67] Tilmann Gneiting, Fadoua Balabdaoui, and Adrian Raftery. “Probabilistic forecasts, calibration and sharpness”. In: *Journal of the Royal Statistical Society: Series B* 69 (2007), pp. 243–268. URL: <https://doi.org/10.1371/journal.pcbi.1004187>.
- [68] Sen Pei et al. “Forecasting the spatial transmission of influenza in the United States”. In: *Proceedings of the National Academy of Sciences* 115.11 (2018), pp. 2752–2757. DOI: [10.1073/pnas.1708856115](https://doi.org/10.1073/pnas.1708856115). URL: <https://www.pnas.org/content/115/11/2752>.

## 1 Supplemental methods

### 2 Priors on parameters common to all models

3 In each model that we considered, we iteratively estimated the reporting probability  
4 ( $\rho$ ), dispersion parameter of the negative binomial distribution ( $\phi$ ),  $R$  multiplier  
5 ( $k$ ), and the timing of the first infection ( $\iota$ ). When possible, we leveraged previous  
6 estimates of parameters to inform prior distributions for model parameters. In some  
7 instances, we used dengue-specific parameter estimates as priors for Zika-specific  
8 parameters [1].

9 For the reporting probability ( $\rho$ ), we assumed a mean of 0.2 and a variance of  
10 0.05. Although this mean and variance are not directly informed by an empirical  
11 study of Zika reporting, they are in line with what we would expect for dengue [2, 3]  
12 and Zika [4]. We assumed that  $\rho$  was a beta random variable and, using the method  
13 of moments, we specified a prior distribution for  $\rho$  such that

$$\rho \sim \text{beta}(0.44, 1.76) \quad (10)$$

14 which resulted in mean and variance consistent with our prior assumptions.

15 The dispersion parameter of the negative binomial distribution accounts for vari-  
16 ability in case reporting beyond that captured by  $\rho$ . Lower values of the dispersion  
17 parameter indicate overdispersion, such that variability in cases cannot be explained  
18 by a single rate of case incidence, as would be generated by a Poisson distribution  
19 with rate  $\rho I_{d,t}$ . Given the likelihood of variation in the reporting probability over  
20 the course of the epidemic [5] and across departments [6], we specified a uniform  
21 prior for  $\phi$ ,

$$\phi \sim \text{uniform}(0, 1), \quad (11)$$

22 which resulted in a level of overdispersion in reporting equal to at least a geometric  
23 distribution ( $\phi = 1$ ) but potentially greater ( $\phi < 1$ ).

24 To relate the transmission coefficient ( $\beta_{d,t}$ ) to environmentally driven descriptions  
25 of the reproduction number ( $R_{d,t}$ ), we used a multiplier ( $k$ ) that applied to both the  
26 static and dynamic models of  $R$ . We specified a gamma prior distribution,

$$k \sim \text{gamma}(2.25, 0.75), \quad (12)$$

27 the parameters of which were chosen by moment matching to result in a mean of  
28 three and a variance of two.

29 To seed the Zika epidemic in Colombia, we assumed that undetected transmission  
30 could have been occurring at any time throughout the first 34 weeks of 2015. For  
31 reference, the first case was not reported until August 9, 2015 (week 35). Thus, we  
32 specified a uniform prior for the date of the initial introduction ( $\iota_1$ ) between weeks  
33 1 and 34 of 2015. We assumed that the location of the first introduction ( $l_1$ ) could  
34 have been any of the departments in Colombia with equal prior probability.

## 35 Assumptions about human mobility

### 36 Spatially coupled models

37 For the spatially coupled models, we assumed that transmission was coupled across  
38 departments by human mobility. In these models, we informed the spatial connec-  
39 tivity matrix in three ways: i) aggregated mobility patterns extracted from mobile  
40 phone call detail records (CDRs), ii) a gravity model, or iii) a radiation model. In

41 the gravity and radiation models,  $T_{i,j}$  is defined as the total number of trips from  
42 department  $i$  to department  $j$ . This takes the form  $T_{i,j} = c \frac{N_i^\alpha N_j^\beta}{d_{i,j}^\gamma}$  in the gravity  
43 model and  $T_{i,j} = T_i \frac{N_i N_j}{(N_i + s_{i,j})(N_i + N_j + s_{i,j})}$  in the radiation model, where  $N_i$  and  $N_j$  are  
44 population sizes at the origin  $i$  and destination  $j$ ,  $d_{i,j}$  is the distance between  $i$  and  
45  $j$ ,  $s_{i,j}$  is the total population within radius  $d_{i,j}$  from  $i$ , and  $T_i$  is the total number  
46 of individuals who make a trip. The parameters  $c$ ,  $\alpha$ ,  $\beta$ , and  $\gamma$  were fitted to CDRs  
47 from Spain and validated in West Africa [7]. All three mobility models were row-  
48 normalized to correspond to the proportion of time spent by residents of department  
49  $i$  in department  $j$ .

## 50 Spatially uncoupled models

51 For the spatially uncoupled models, we assumed that each department's epidemic  
52 occurred independently of all other departments. We used the same prior distribu-  
53 tions as described above for  $\rho$ ,  $\phi$ ,  $k$  for each department. Under this assumption, we  
54 did not include a parameter for the location of the initial introduction into Colom-  
55 bia, as we instead were concerned with the initial introduction into that department.  
56 It was still necessary to specify the timing of that introduction and, for models that  
57 considered it, the timing of a second introduction. Following the rationale that  
58 undetected transmission could have occurred for up to 34 weeks prior to the first  
59 reported case in a given department, we assumed an even prior for the timing of the  
60 introduction(s) into a given department.

## 61 Assumptions about environmental drivers of transmission

### 62 Dynamic model

63 The environmentally driven component of  $\beta_{d,t}$  for the dynamic model,  $\tilde{R}_{d,t}(T_{d,t}, OP_{d,t}|c, \psi, \alpha, v)$ ,  
64 was defined as the product of two functions: one that depends on  $T_{d,t}$  and one that  
65 depends on  $OP_{d,t}$ .

66 The function of  $OP_{d,t}$  was defined as  $c(-\log(1 - OP_{d,t}))$ , which converts occur-  
67 rence probability into an expectation of mosquito abundance [8]. The constant  $c$   
68 scales this expectation to account for uncertainty in its magnitude, which we esti-  
69 mated and assumed to have a gamma-distributed prior with a shape parameter of  
70 16 and a rate parameter of 0.07. This choice of prior resulted in average  $\tilde{R}_{d,t}$  being  
71 equal to one when evaluated at the mean values of the prior for  $c$ .

72 The function of  $T_{d,t}$  was based on a temperature-dependent description of the  
73 basic reproduction number by Mordecai et al. [9]. Specifically, we used the version  
74 of that model based on Briere functions for parameters that were not otherwise ac-  
75 counted for in estimates of mosquito occurrence probability [10]. Those parameters  
76 include the mosquito biting rate ( $a$ ), mosquito-to-human transmission probability  
77 ( $b$ ), human-to-mosquito transmission probability ( $c$ ), average adult mosquito lifes-  
78 pan ( $lf$ ), and parasite development rate ( $PDR$ ). Those functions combine to form  
79 the temperature-dependent component of  $\tilde{R}_{d,t}$ ,

$$a(T_{d,t})b(T_{d,t})c(T_{d,t})e^{-1/(lf(T_{d,t})PDR(T_{d,t}))}PDR(T_{d,t}). \quad (13)$$

80 We did not include other parameters from Mordecai et al. [9] related to mosquitoes,  
81 such as immature development rate and egg-to-adult survival rate, as the effects of  
82 those parameters were accounted for in estimates of  $OP_{d,t}$  from Kraemer et al. [10].

83 To reduce the number of parameters that we needed to estimate, we worked with  
84 a simplified description of the temperature curves produced by eq. (13) (Fig. S5).  
85 To do so, we took random draws from the posterior distribution of parameters from  
86 Mordecai et al. [9], computed functions of temperature according to eq. (13), and  
87 fitted parameters of a skew normal distribution to those curves by least squares.  
88 The skew normal distribution has three parameters—location ( $\psi$ ), scale ( $\alpha$ ), shape  
89 ( $v$ )—that together control the mean, variance, and skew of the distribution, which is  
90 sufficient to approximate the uncertainty in posterior predictions of the temperature  
91 curves described by eq. (13). We then took the mean and covariance across those  
92 estimates of  $\psi$ ,  $\alpha$ , and  $v$  to describe their variation with a multivariate normal  
93 distribution, which was the prior distribution we used for those parameters at the  
94 first step of our particle filter.

## 95 Static model

96 The environmentally driven component of  $\beta_d$  for the dynamic model,  $\bar{R}_d(T_{d,\bar{t}}, OP_d, PPP_d)$ ,  
97 was defined as the product of three functions: one that depends on  $T_{d,\bar{t}}$ , one that  
98 depends on  $OP_d$ , and one that depends on  $PPP_d$ . We used values of  $\bar{R}_d$  at the 5  
99 km x 5 km grid cell level as calculated by Perkins et al. [8]. To aggregate them to  
100 the department level, we took a population-weighted mean of  $\bar{R}_d$  across 5 km x 5  
101 km grid cells within each department. Although we made no other modifications to  
102 the calculation of  $\bar{R}_d$ , we summarize the methodology used by Perkins et al. [8] in  
103 the interest of comparability with the dynamic model.

104 The function of  $OP_d$  was defined as  $-\log(1 - OP_d)$ , which was the same proce-  
105 dure used to convert occurrence probability into an expectation of mosquito abun-  
106 dance as used in the dynamic model. For the static model, however, we followed  
107 Perkins et al. [8] and relied on a description of occurrence probability that was not  
108 defined on a time-varying basis [10].

109 Rather than estimate a scaling parameter like  $c$  in the dynamic model, we relied  
110 on a scaling parameter defined as a function of  $PPP_d$  by Perkins et al. [8]. This  
111 function took the form of a monotonically decreasing, cubic spline function estimated  
112 with a shape-constrained additive model. The data that informed this estimate of  
113 both the relationship with  $PPP_d$  and the magnitude of  $\bar{R}_d$  were outbreak sizes of 12  
114 chikungunya outbreaks and one Zika outbreak [8] that occurred prior to the ZIKV  
115 invasion of the Americas.

116 The function of  $T_{d,\bar{t}}$  was based on a temperature-dependent description of the  
117 basic reproduction number that includes temperature-dependent descriptions of  
118 mosquito mortality ( $\mu$ ) [11] and the extrinsic incubation period ( $n$ ) [12]. Those  
119 functions contribute to an expression for monthly contributions to  $R_{d,t}$ ,

$$\frac{bca^2 e^{-\mu(T_{d,t})n(T_{d,t})}}{\mu(T_{d,t})r}, \quad (14)$$

120 along with constants that represent the mosquito-to-human transmission probability  
121 ( $b$ ), human-to-mosquito transmission probability ( $c$ ), mosquito biting rate ( $a$ ), and  
122 rate of recovery from human infection ( $r$ ). For each department  $d$ , we took the  
123 average of the six largest values of eq. (14) as the contribution of  $T_{d,\bar{t}}$  to  $\bar{R}_d$ .

## 124 **Assumptions about introduction events**

### 125 **One-introduction models**

126 Each of the one-introduction models assumed infections were seeded at one point in  
127 time ( $t_1$ ) in one location ( $l_1$ ), as specified in the general model parameters section  
128 of the Supplementary Methods.

### 129 **Two-introduction models**

130 Each of the two-introduction models made similar assumptions about  $t_1$  and  $l_1$  for  
131 the first introduction. For these models, we additionally specified the timing ( $t_2$ ) and  
132 location ( $l_2$ ) of the second introduction events, for which we assumed even priors.  
133 In reality, there were likely more than only one or two introductions throughout  
134 the epidemic, but genomic epidemiology suggests the majority of local transmission  
135 resulted from only one or two introductions [13].

136 **Supplemental tables**

| Symbol      | Definition                        | Class                       |
|-------------|-----------------------------------|-----------------------------|
| $\rho$      | Reporting probability             | Estimated parameter         |
| $\phi$      | Overdispersion in reporting       | Estimated parameter         |
| $k$         | $R_{d,t}$ multiplier              | Estimated parameter         |
| $\iota_1$   | Timing of first infection         | Estimated parameter         |
| $\iota_2$   | Timing of second infection        | Estimated parameter         |
| $l_1$       | Location of first infection       | Estimated parameter         |
| $l_2$       | Location of second infection      | Estimated parameter         |
| $c$         | Dynamic $R$ scalar                | Estimated parameter         |
| $\psi$      | Location for skew normal          | Estimated parameter         |
| $\alpha$    | Scale for skew normal             | Estimated parameter         |
| $\nu$       | Shape for skew normal             | Estimated parameter         |
| $\theta$    | Parameter set                     | Set of estimated parameters |
| $I_{d,t}$   | Simulated infections              | State variable              |
| $I'_{d,t}$  | Redistributed infections          | State variable              |
| $I''_{d,t}$ | Effective number of infections    | State variable              |
| $C_{d,t}$   | Simulated cases                   | State variable              |
| $y_{d,t}$   | Observed data                     | Data                        |
| $d$         | Department index                  | Data                        |
| $t$         | Time; $t = 0, \dots, T$           | Data                        |
| $n$         | Particle index; $n = 1, \dots, N$ | Data                        |
| $\eta$      | Timing of first reported case     | Data                        |

Table S1: Mathematical symbols for parameters, state variables, and data with their respective meanings.

137 Supplemental figures

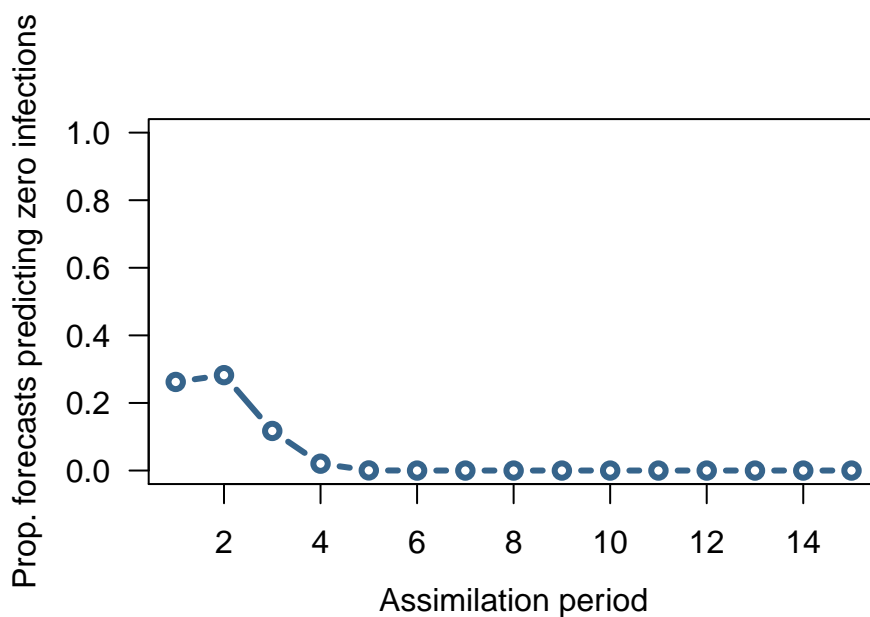

Figure S1: **Proportion of forecast trajectories predicting zero infections.** Forecast trajectories are specific to each particle and this example is from the model using CDR-derived mobility data, static  $R$ , and one importation event, corresponding to Fig. S2.



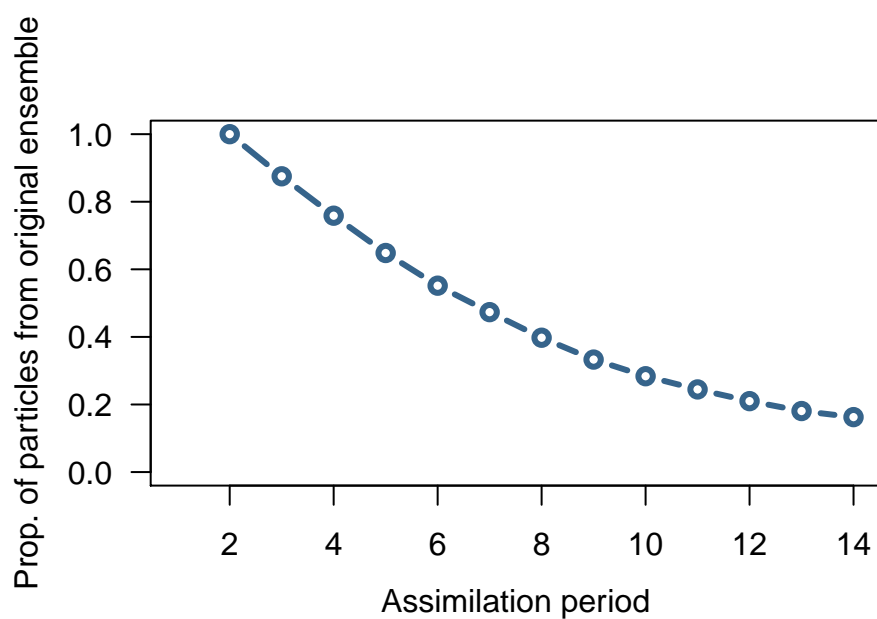

Figure S2: **Proportion of particles that remain from the original particle ensemble present in the retained ensemble at each assimilation period.** This example is from the model using CDR-derived mobility data, static  $R$ , and one importation event, corresponding to Fig. S1.

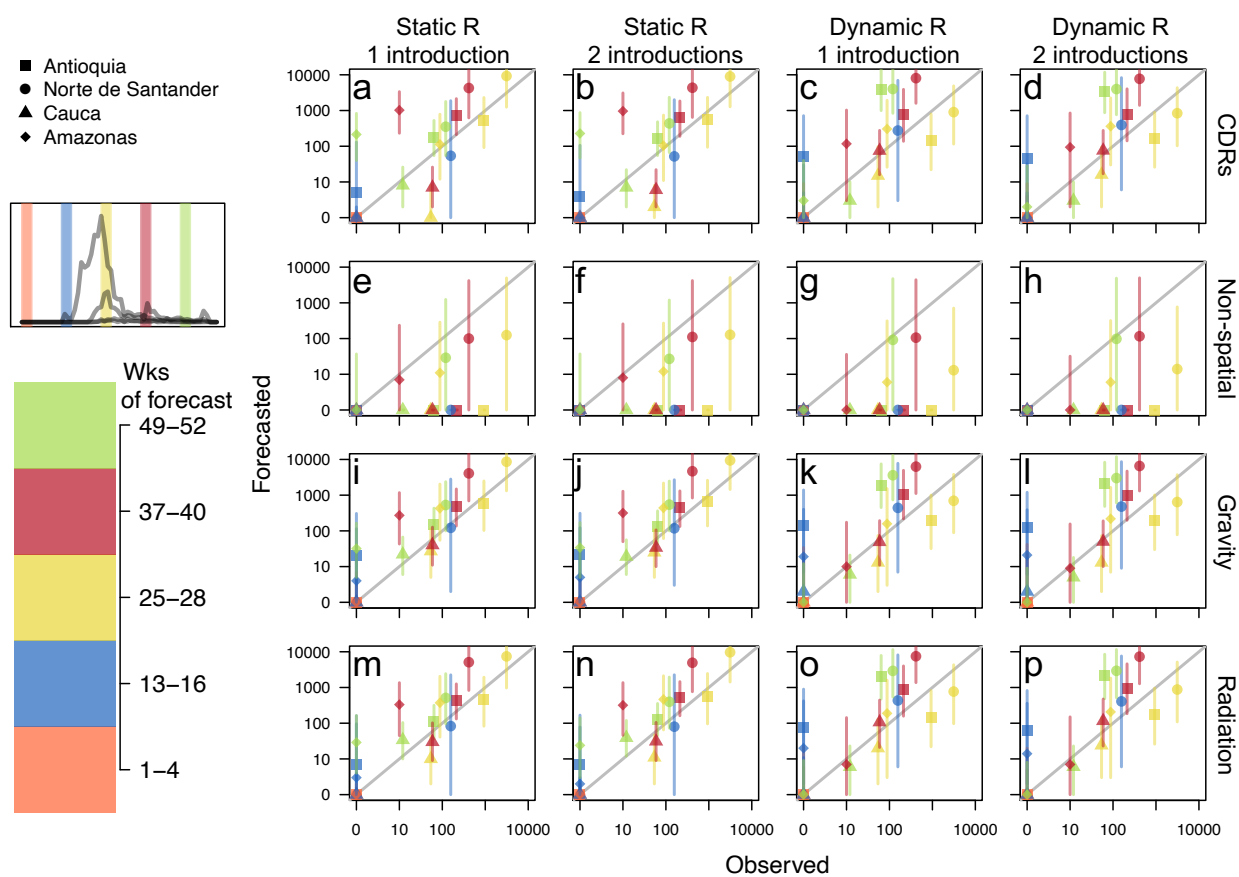

Figure S3: Cumulative observed versus forecasted incidence at 4-week ahead intervals for each individual model for Antioquia, Norte de Santander, Cauca, and Amazonas at five points throughout the epidemic. *a-p*. Each plot represents a different model, with model features labels on rows and columns. Plotted departments reflect differences in population, epidemic size, and geographic regions of Colombia and are denoted by point type. Point shape denotes department. Point color indicates time at which forecasts were generated and is visually denoted in inset plot and color bar. 1-, 2-, 3-, and 4-week ahead forecasts and observed incidence were aggregated for ease of comparison. Points are the median values and lines are the 50% credible interval. 1:1 line is in grey.

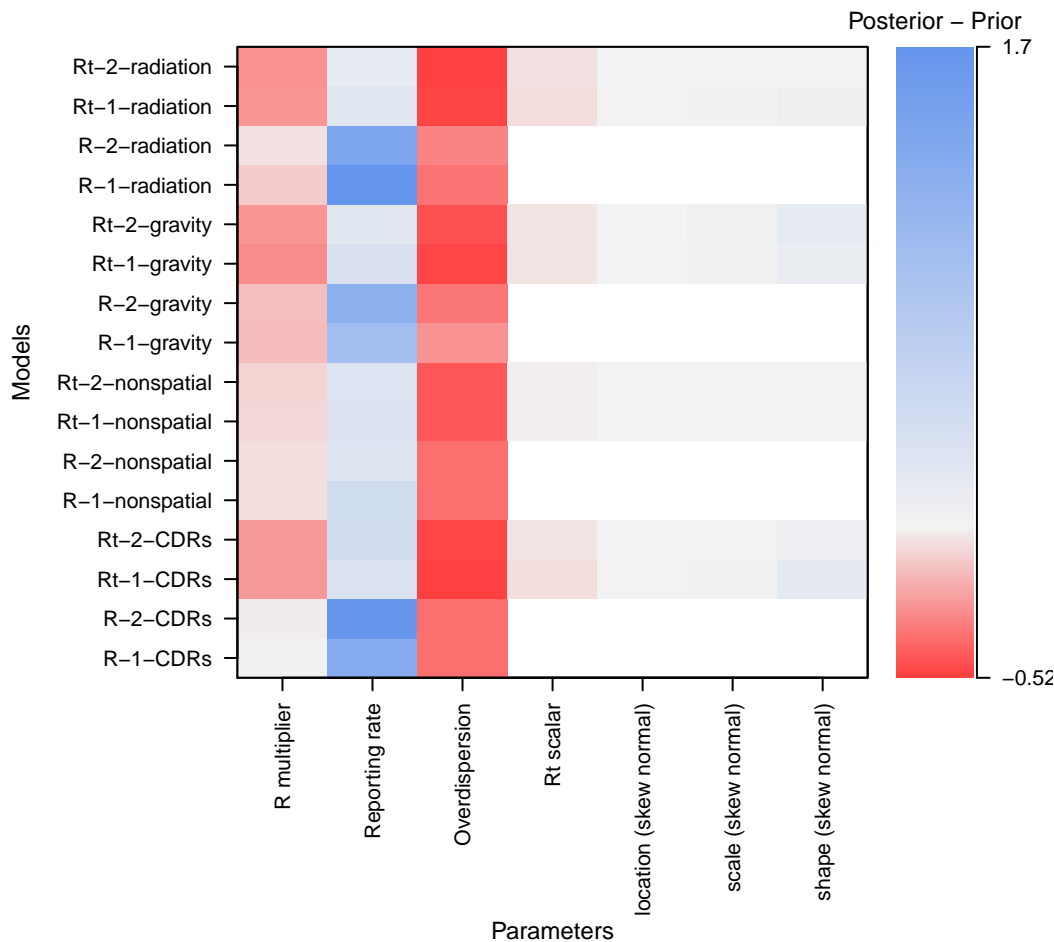

Figure S4: **Relative difference between the prior estimates of the parameters and the posterior estimates at the final time point in the epidemic.** Parameters include the  $R$  multiplier ( $k$ ), reporting rate ( $\rho$ ), overdispersion parameter ( $\phi$ ),  $R_t$  scalar ( $c$ ), and the location ( $\psi$ ), shape ( $\alpha$ ), and scale ( $\nu$ ) parameters for the skew normal distribution. Blue indicates posterior estimates were higher than prior estimates, red indicates posterior estimates were lower than prior estimates, and grey indicates no difference. Areas in white indicate the corresponding model does not use that parameter. To calculate the relative difference, we subtracted the prior estimates of parameters from the posterior estimates of parameters and divided the difference by the prior to standardize over different parameter magnitudes. For comparison purposes, we left out the initial timing and initial location of ZIKV introduction parameters.

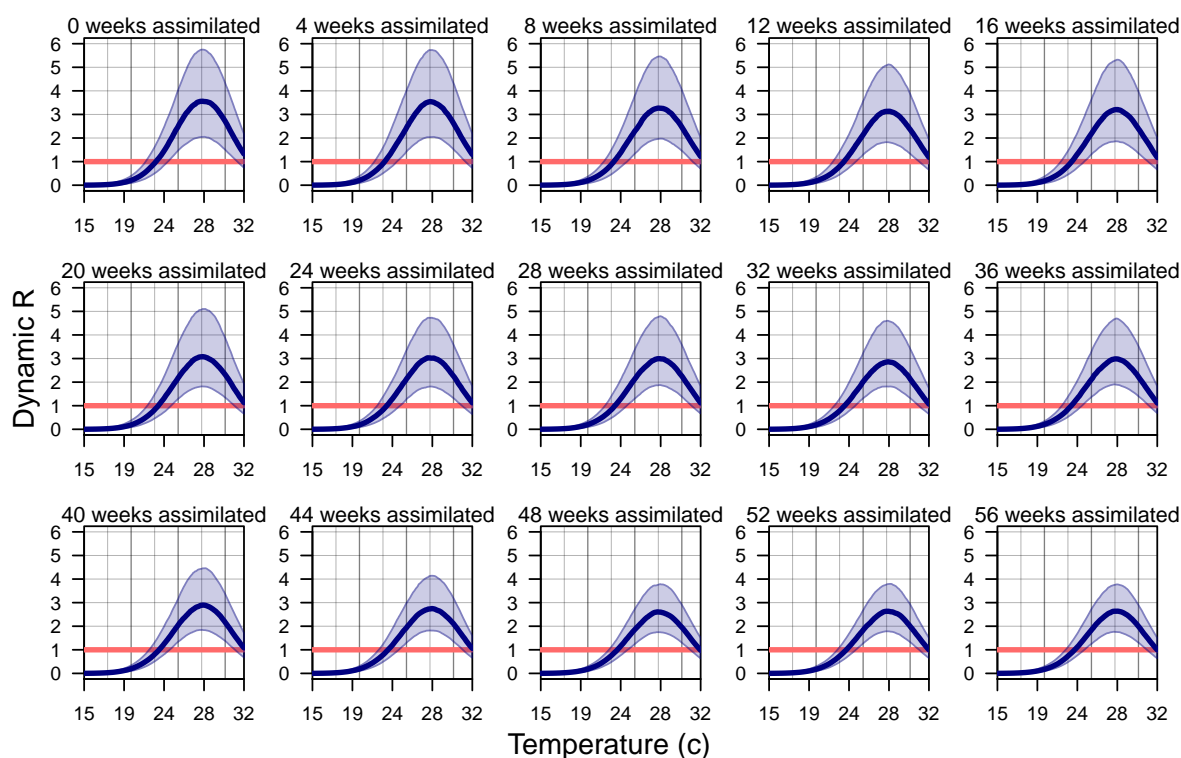

Figure S5: **Estimates of  $R$  at each assimilation week across temperatures for average mosquito occurrence probability in Colombia.** Blue bands indicate 95% credible interval, with thick navy line indicating the median estimate of  $R$ . Horizontal red line indicates  $R = 1$ .

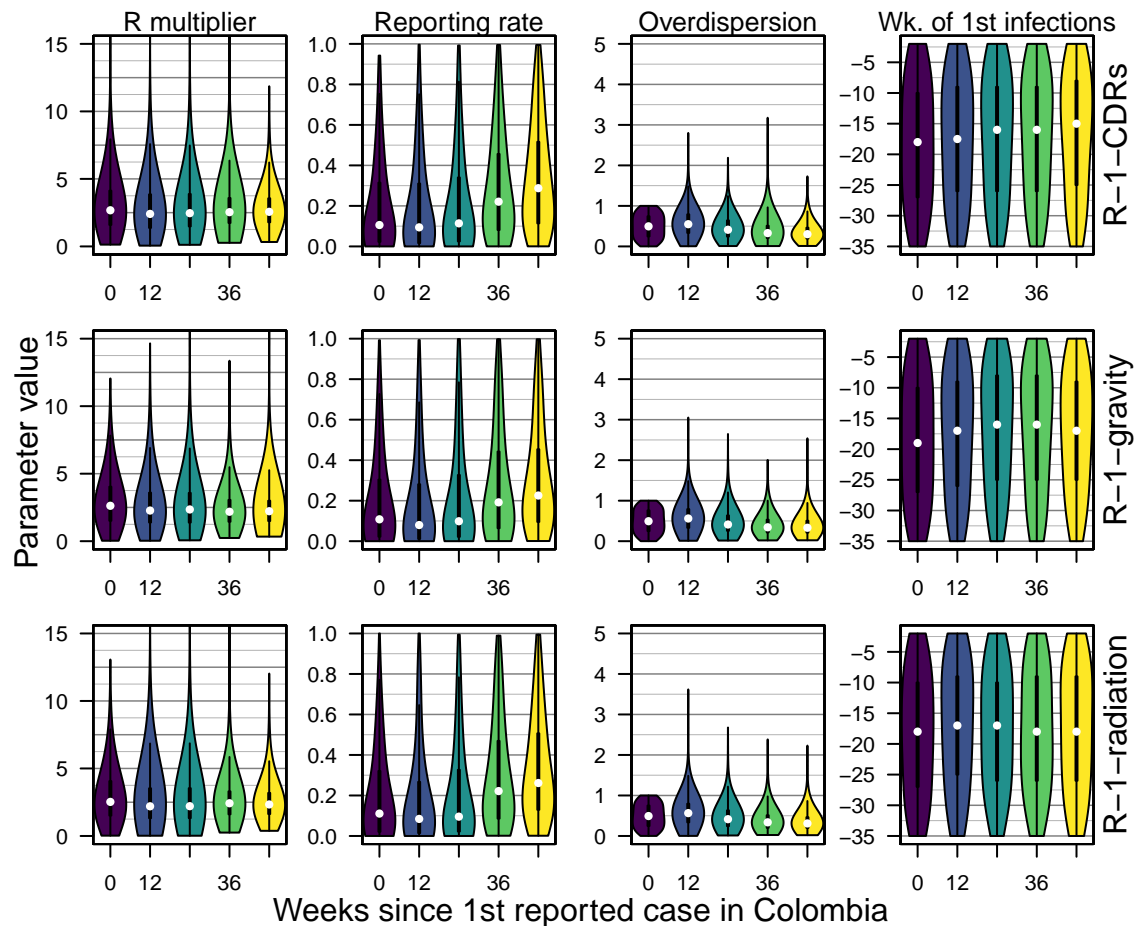

Figure S6: **Posterior distributions of model parameters for the spatially coupled models with a static  $R$  at five different points in time.** The  $R$  multiplier ( $k$ ), reporting rate ( $\rho$ ), the overdispersion parameter ( $\phi$ ), and the timing of the first importations ( $t_1$ ) were model parameters represented in each model, although we are showing the posterior distribution only for a subset of the models. Violin plots are colored by time at which the forecasts were made, and correspond to time points in Fig. S3 and Fig. S23, S10

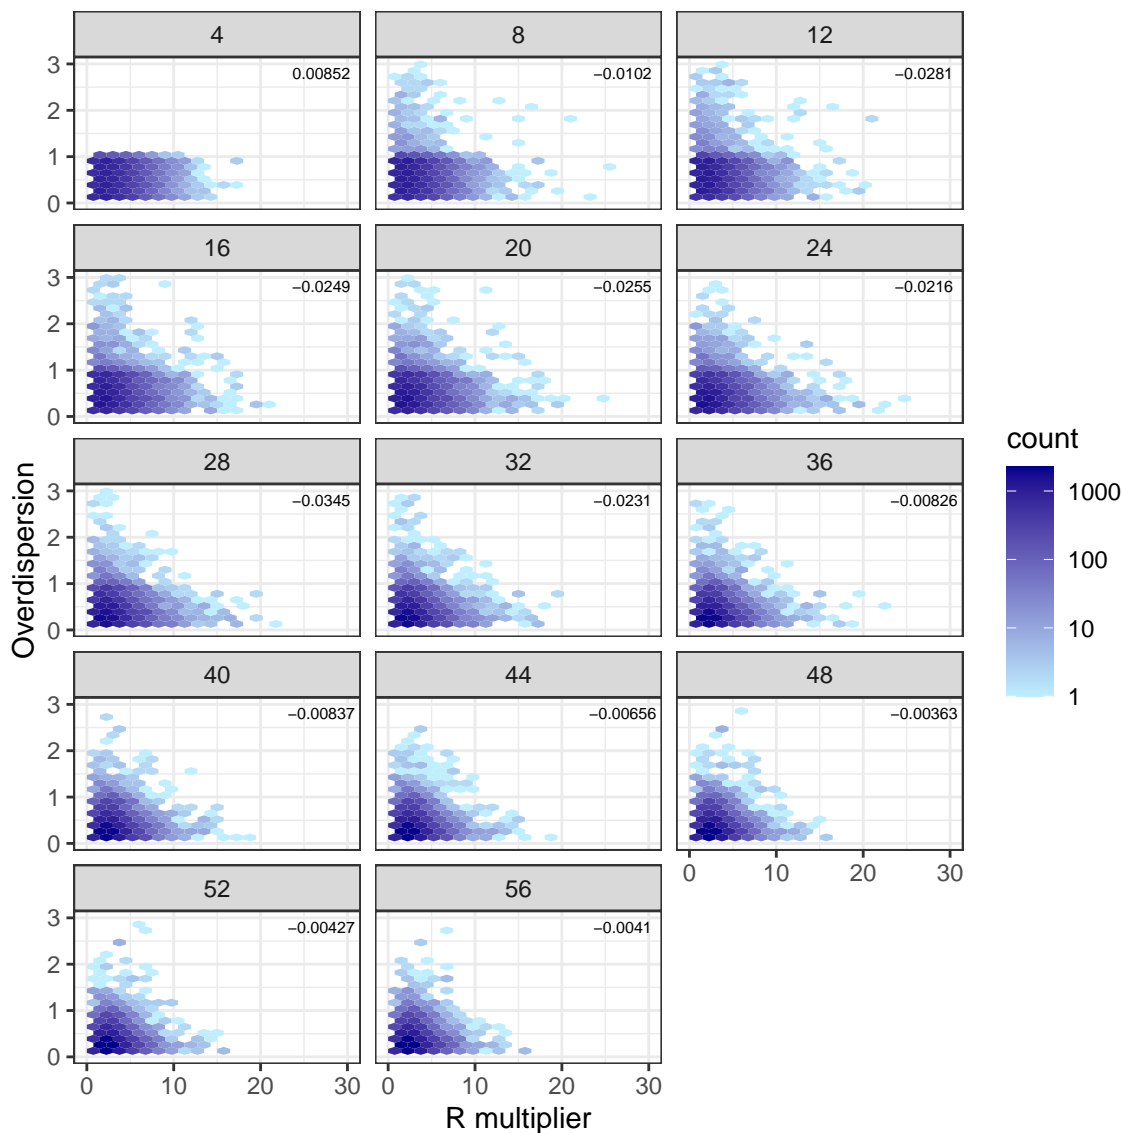

Figure S7:  $R_d$  multiplier versus the overdispersion parameter in the negative binomial distribution. The overdispersion parameter in the negative binomial distribution represents the variability in the reporting probability. Pearson's correlation coefficient for the two parameters within a parameter set is listed in the top right corner. This example is from the model using CDR-derived mobility data, static  $R$ , and one importation event, corresponding to Fig. S1.

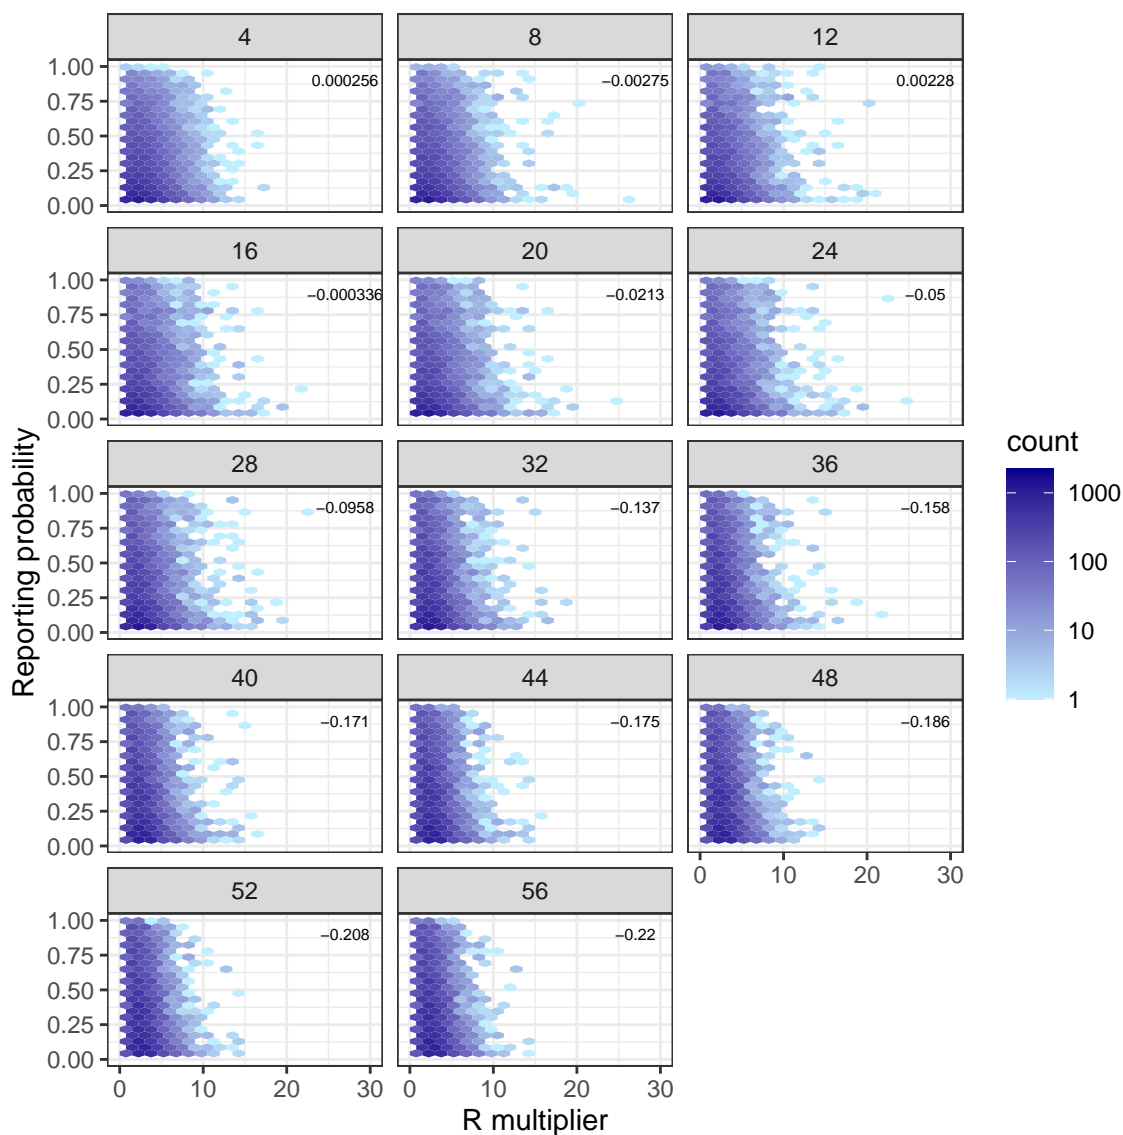

Figure S8:  $R_d$  multiplier versus the reporting probability. Pearson's correlation coefficient for the two parameters within a parameter set is listed in the top right corner. This example is from the model using CDR-derived mobility data, static  $R$ , and one importation event, corresponding to Fig. S1.

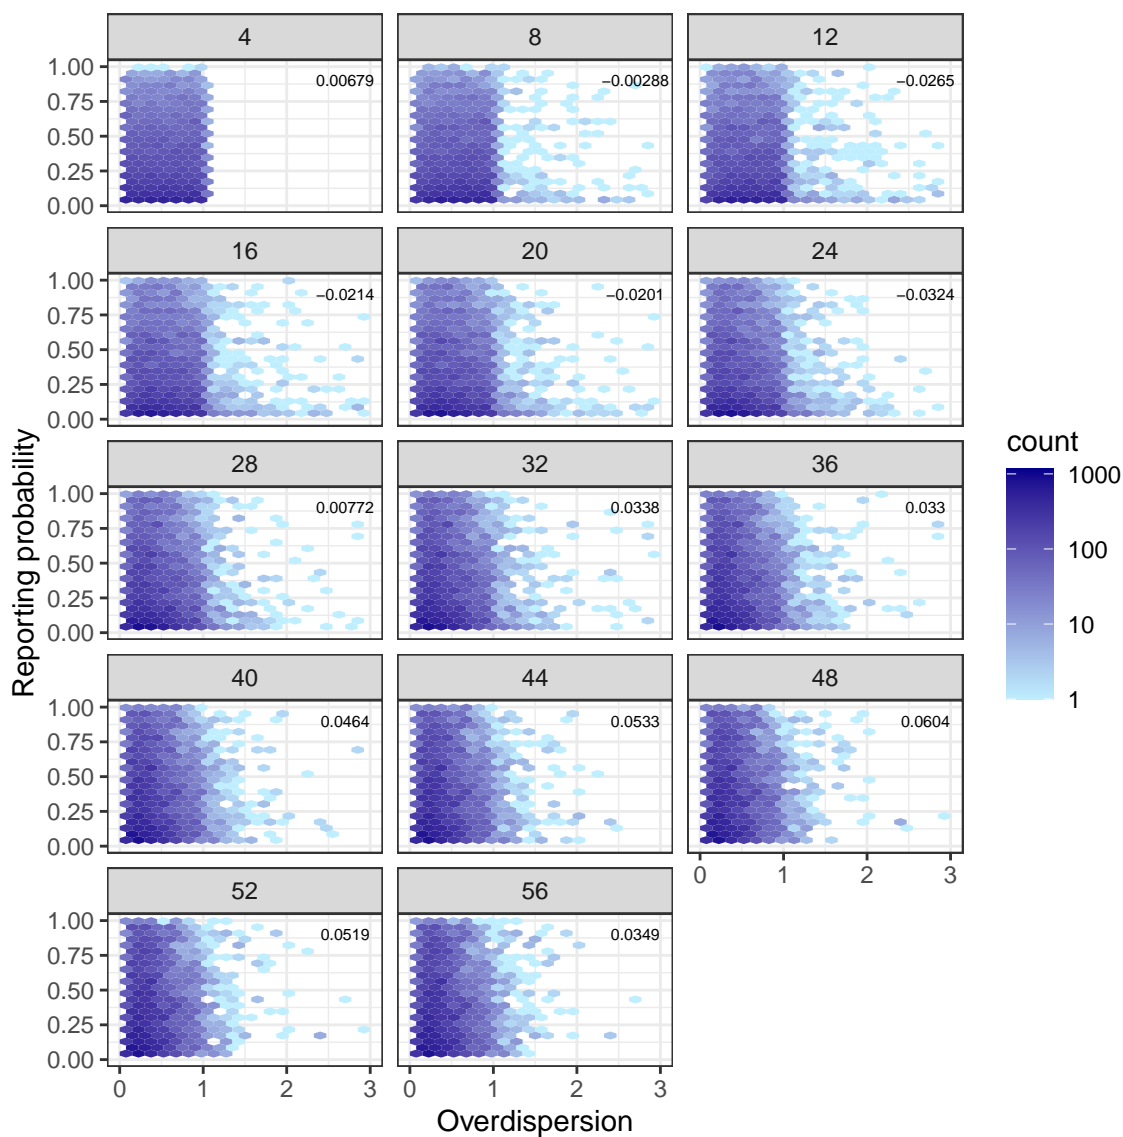

Figure S9: **The negative binomial overdispersion parameter versus the reporting probability for one example model at each assimilation period.** The overdispersion parameter in the negative binomial distribution represents the variability in the reporting probability. Pearson's correlation coefficient for the two parameters within a parameter set is listed in the top right corner. This example is from the model using CDR-derived mobility data, static  $R$ , and one importation event, corresponding to Fig. S1.



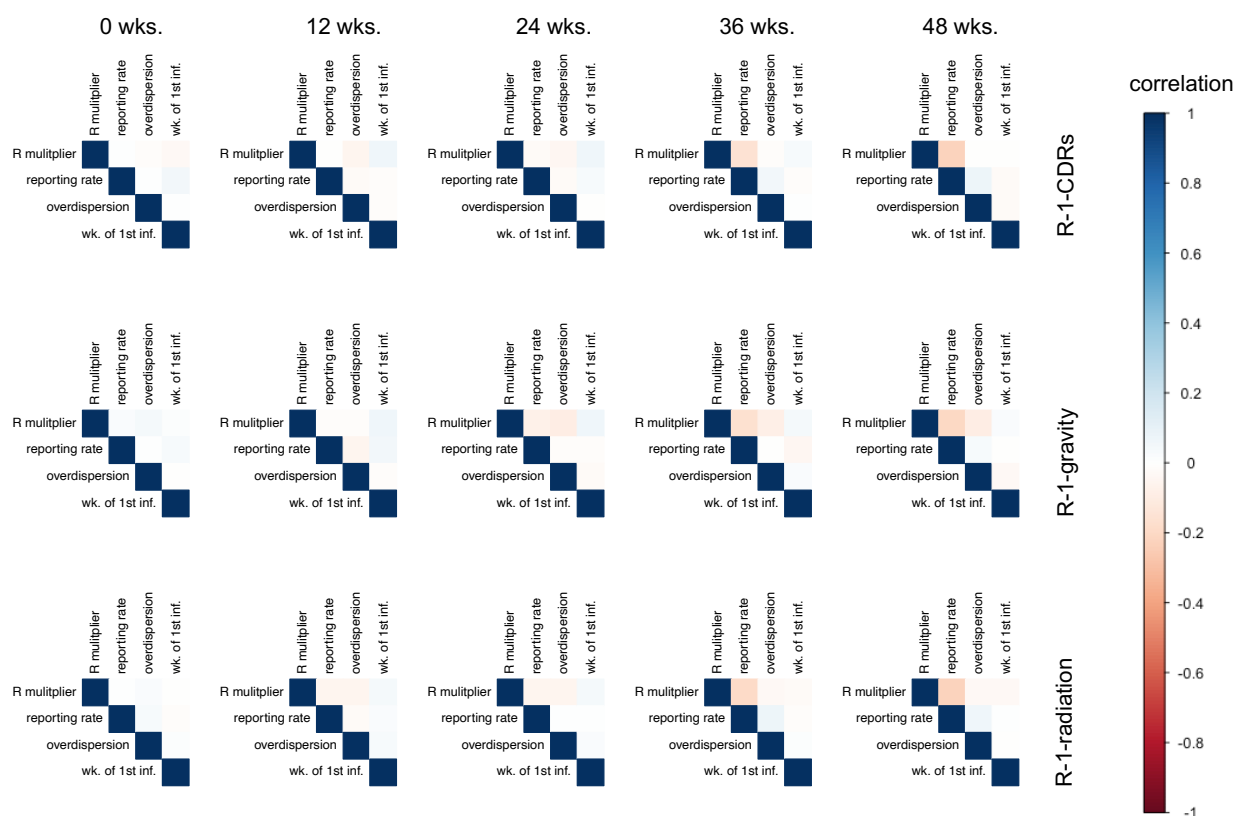

Figure S10: Correlation of model parameters across within a parameter set through time for the spatially coupled models with a static  $R$  at five different points in time. Parameters include, the  $R$  multiplier ( $k$ ), reporting rate ( $\rho$ ), the overdispersion parameter ( $\phi$ ), and the timing of the first importations ( $t_1$ ) as they were represented in each model, although we are showing the correlations only for a subset of the models. Time points shown here correspond to those time points in Fig. S3 and Fig. S23, S6.

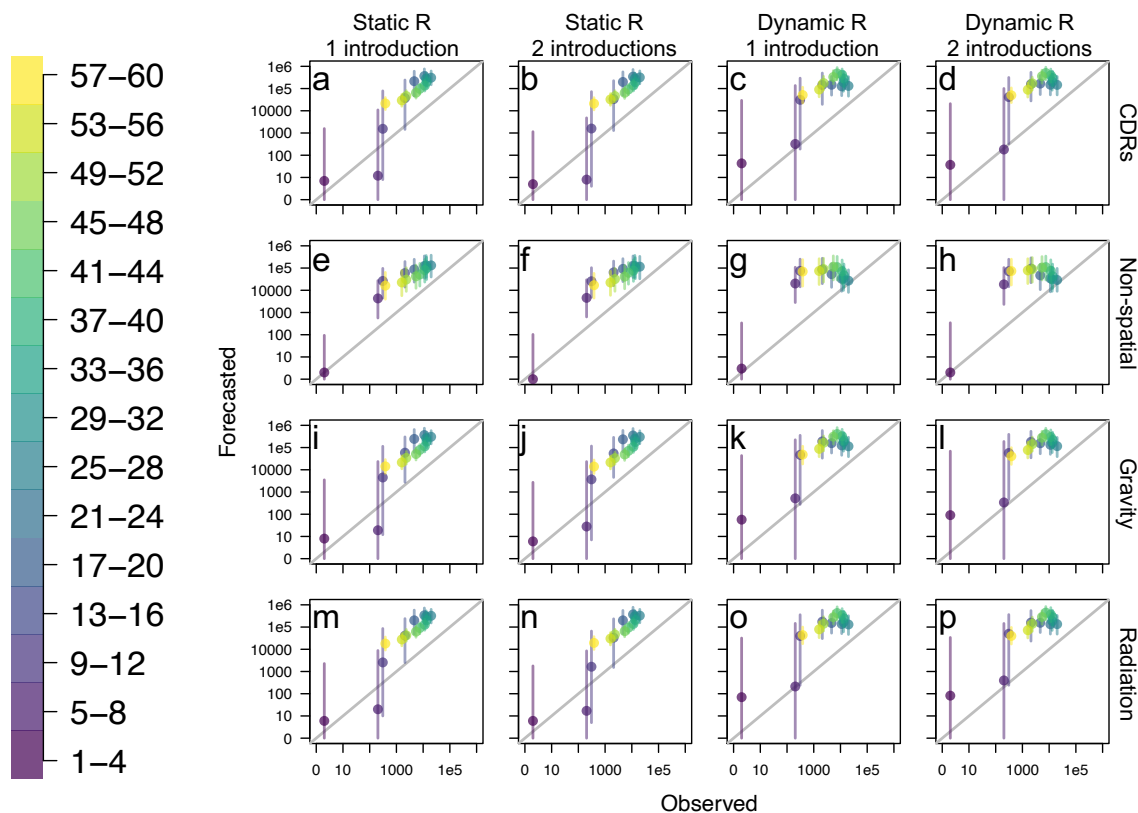

Figure S11: Cumulative observed versus forecasted incidence at 1-, 2-, 3-, 4- week ahead intervals for each individual model aggregated nationally at each point throughout the epidemic. *a-p*. Each plot represents a different model, with model feature labels on rows and columns. Point color indicates time at which forecasts were generated. Points are the median values and lines are the 50% credible interval. 1:1 line is in grey.

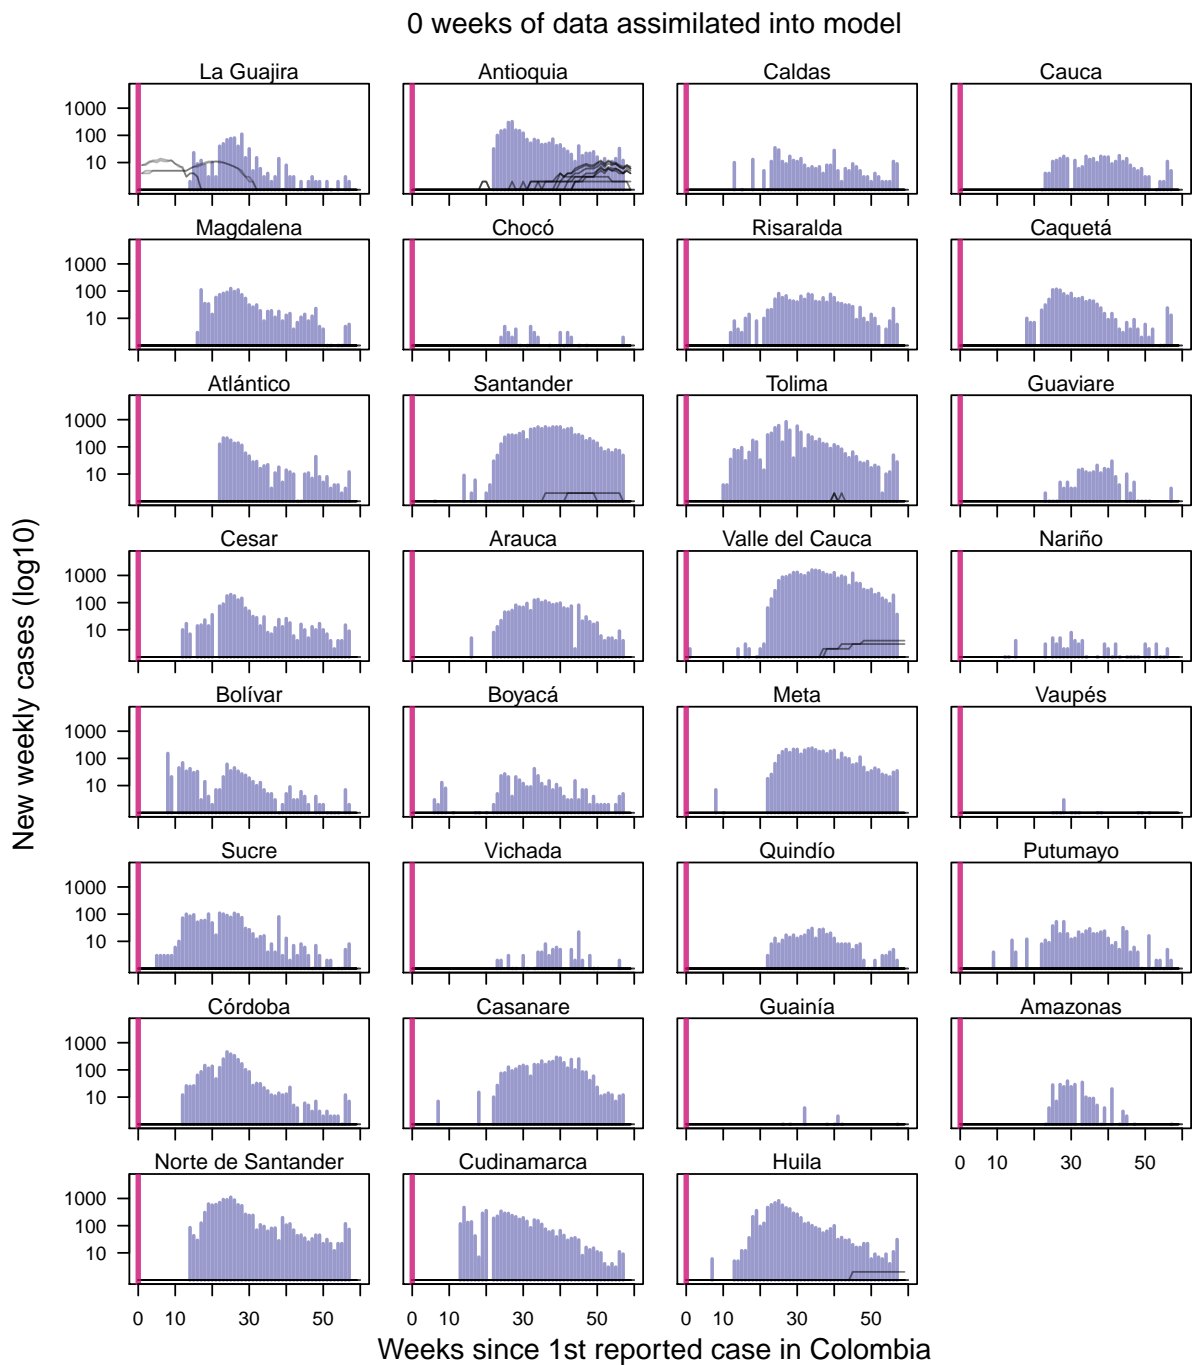

Figure S12: **Observed incidence with initial median forecast for each of the 16 models with no weeks of data yet assimilated forecasting models.** Navy bars indicate Zika incidence data at weekly time interval [14]. Vertical line indicates the point at which the forecast was made, with data to the left of the line assimilated into the model. Forecasts to the right of the vertical line change as more data is assimilated into the model, while model fits to the left of the vertical line do not change. With the forecasts generally being at zero cases in the majority of the departments, we see that models were unlikely to forecast an epidemic to occur when no data was yet to be assimilated.

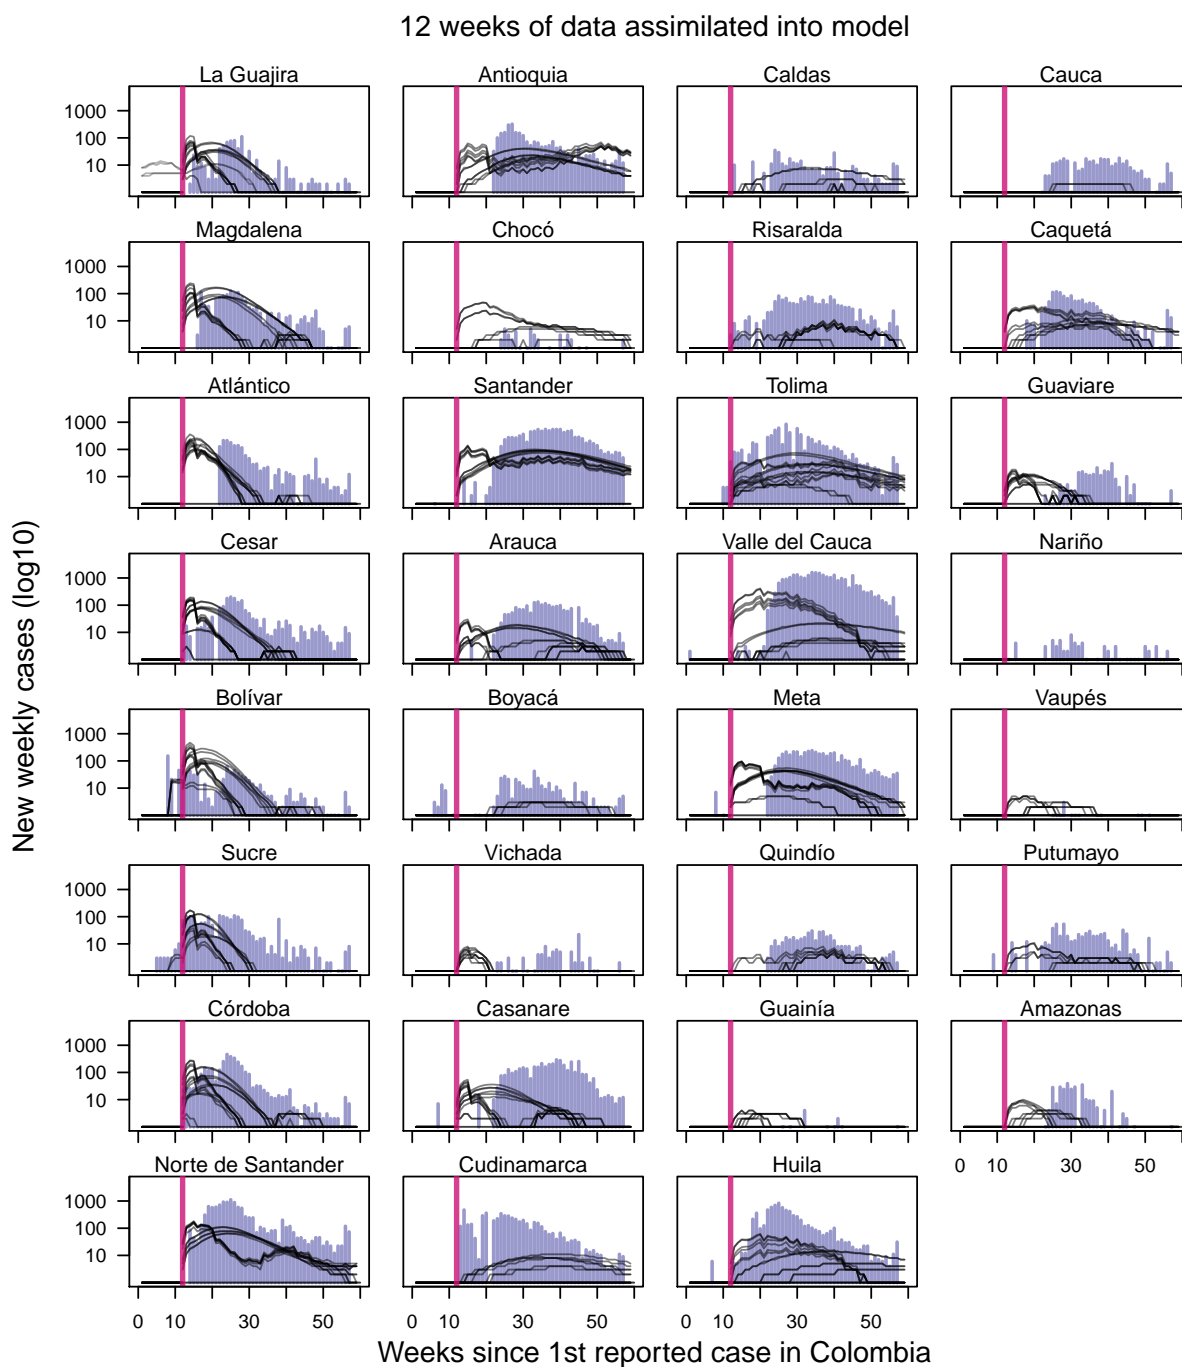

Figure S13: **Observed incidence with median forecast for each of the 16 models with 12 weeks of data assimilated into forecasting models.** Navy bars indicate Zika incidence data at weekly time interval [14]. Vertical line indicates the point at which the forecast was made, with data to the left of the line assimilated into the model. Forecasts to the right of the vertical line change as more data is assimilated into the model, while model fits to the left of the vertical line do not change.

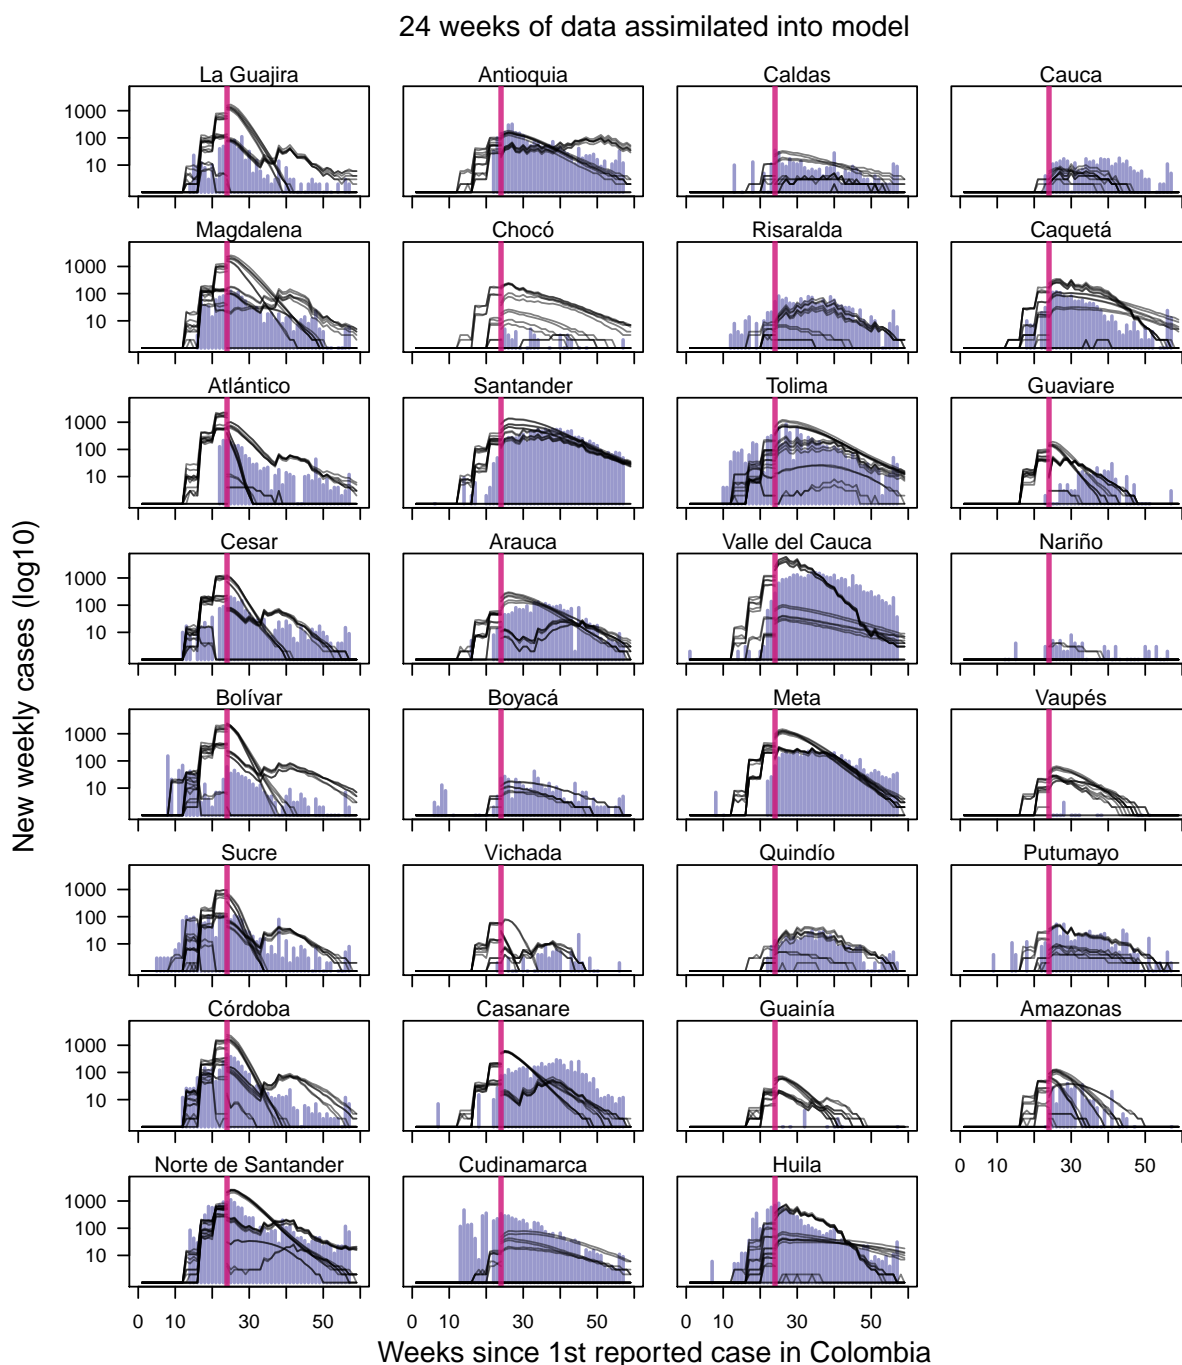

Figure S14: **Observed incidence with median forecast for each of the 16 models with 24 weeks of data assimilated into forecasting models.** Navy bars indicate Zika incidence data at weekly time interval [14]. Vertical line indicates the point at which the forecast was made, with data to the left of the line assimilated into the model. Forecasts to the right of the vertical line change as more data is assimilated into the model, while model fits to the left of the vertical line do not change.

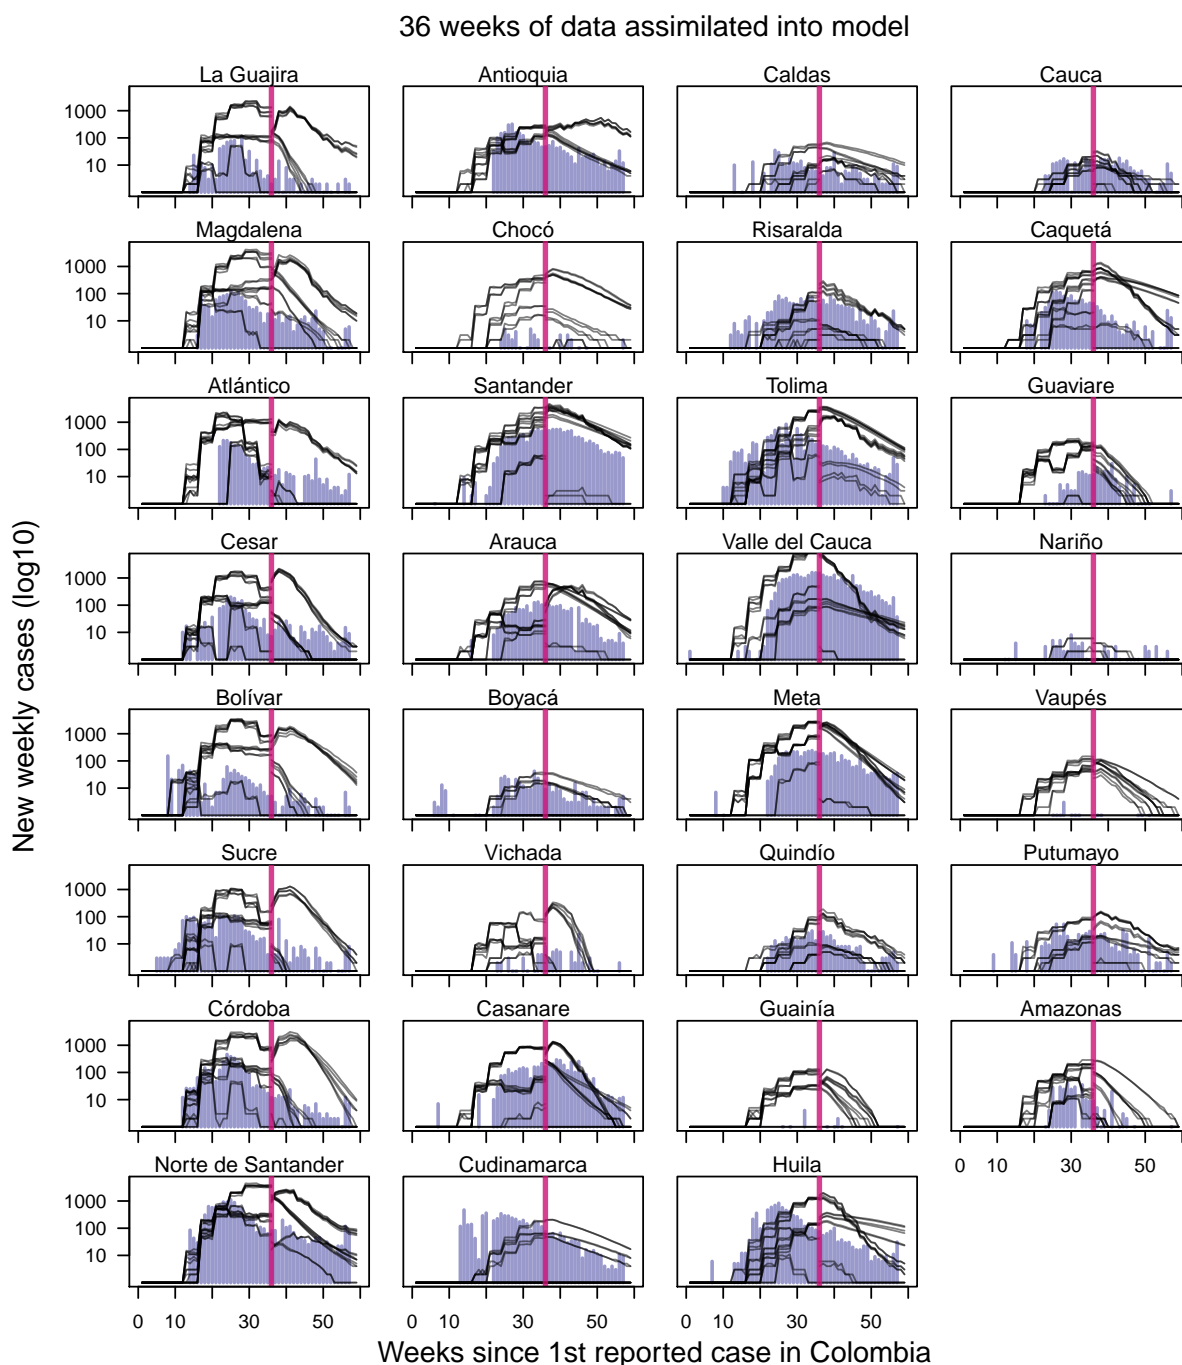

Figure S15: **Observed incidence with median forecast for each of the 16 models with 36 weeks of data assimilated into forecasting models.** Navy bars indicate Zika incidence data at weekly time interval [14]. Vertical line indicates the point at which the forecast was made, with data to the left of the line assimilated into the model. Forecasts to the right of the vertical line change as more data is assimilated into the model, while model fits to the left of the vertical line do not change.

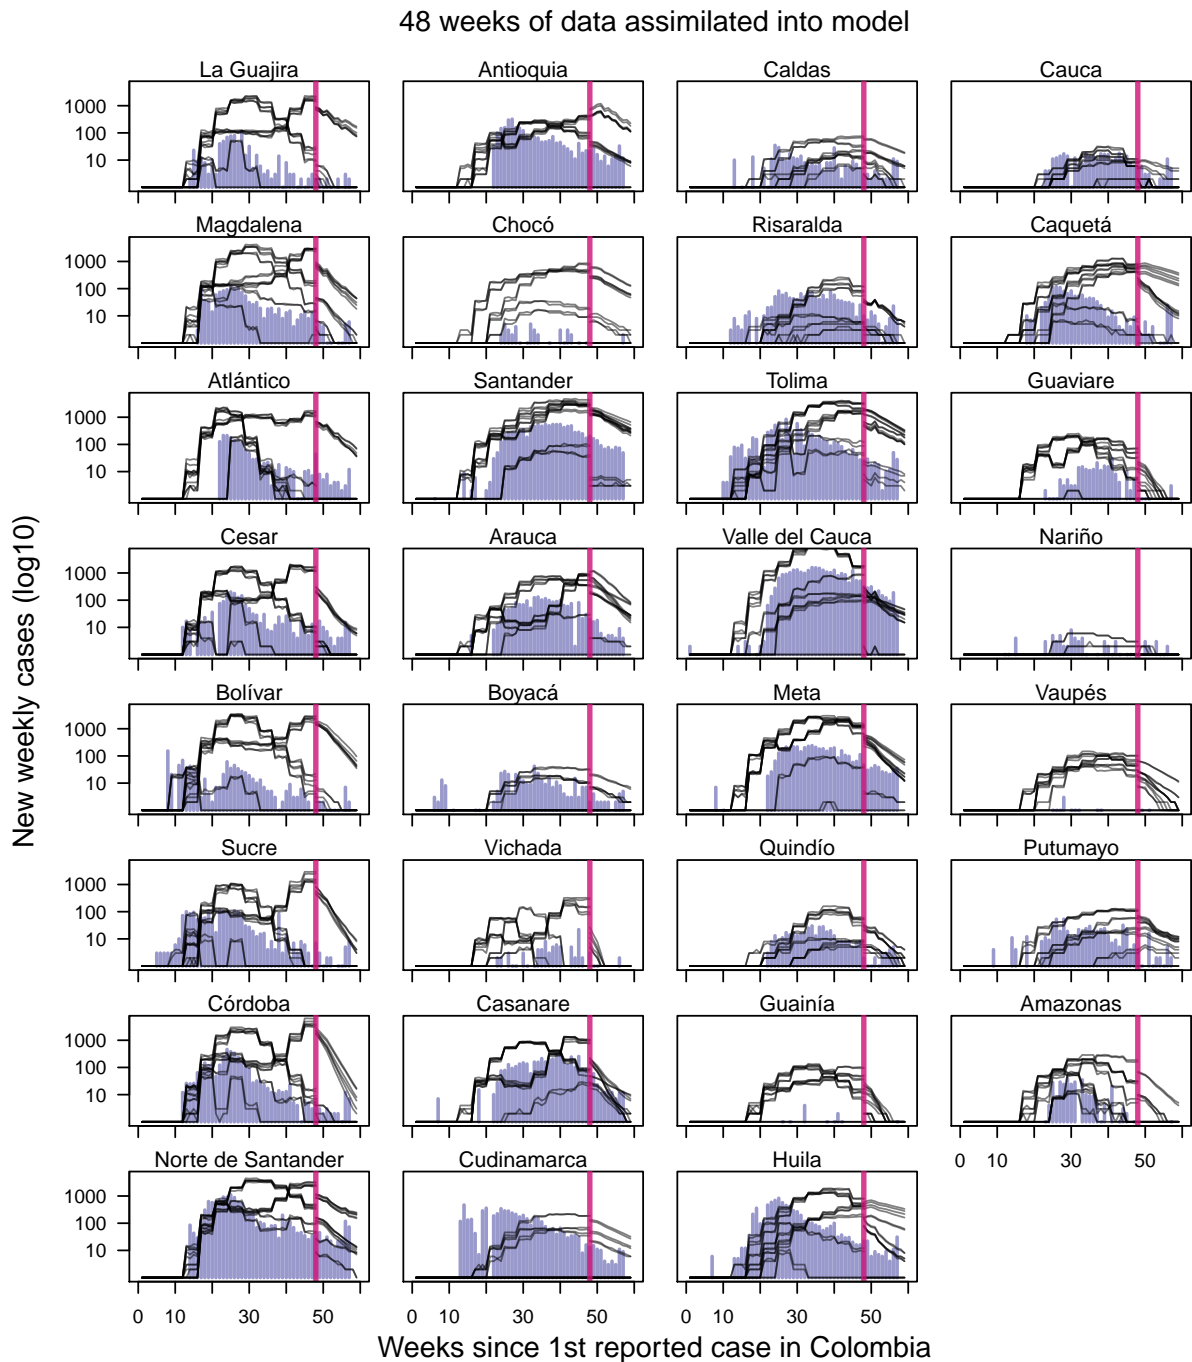

Figure S16: **Observed incidence with median forecast for each of the 16 models with 48 weeks of data assimilated into forecasting models.** Navy bars indicate Zika incidence data at weekly time interval [14]. Vertical line indicates the point at which the forecast was made, with data to the left of the line assimilated into the model. Forecasts to the right of the vertical line change as more data is assimilated into the model, while model fits to the left of the vertical line do not change.

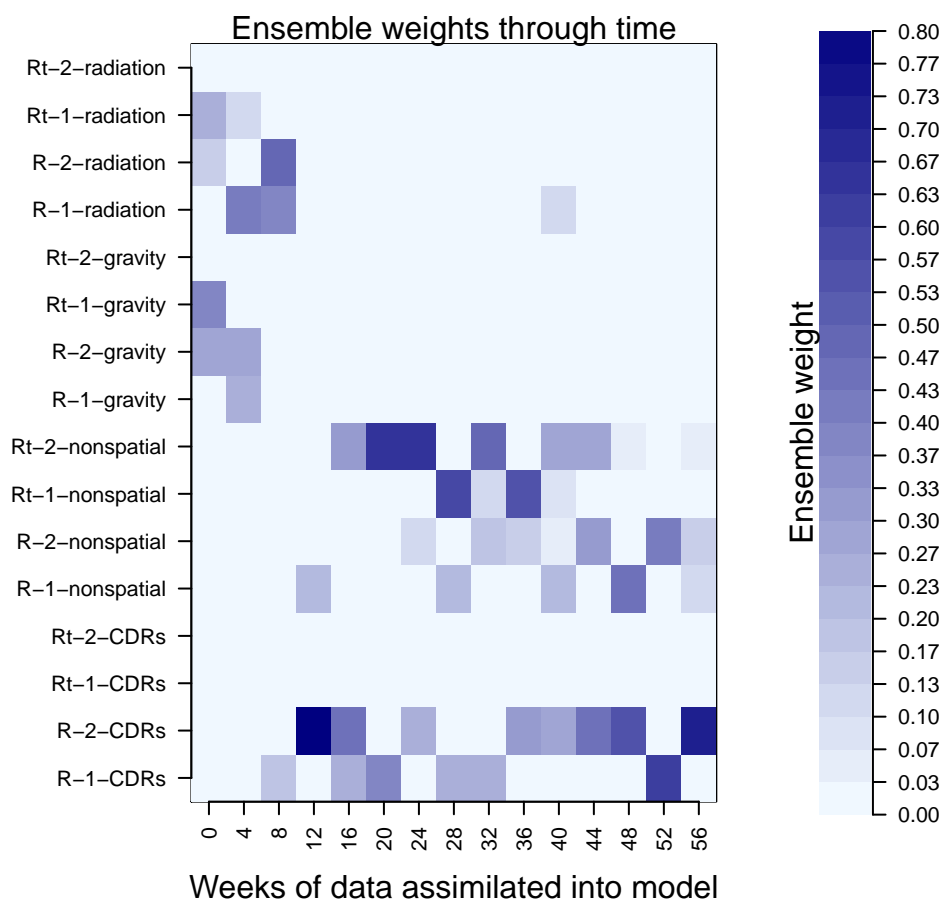

Figure S17: **Ensemble weights of each model at each assimilation period.** Ensemble weights were calculated using the expectation-maximization algorithm on short-term forecast performances, where forecast performance was assessed against 4-wk ahead incidence in a given department and nationally.





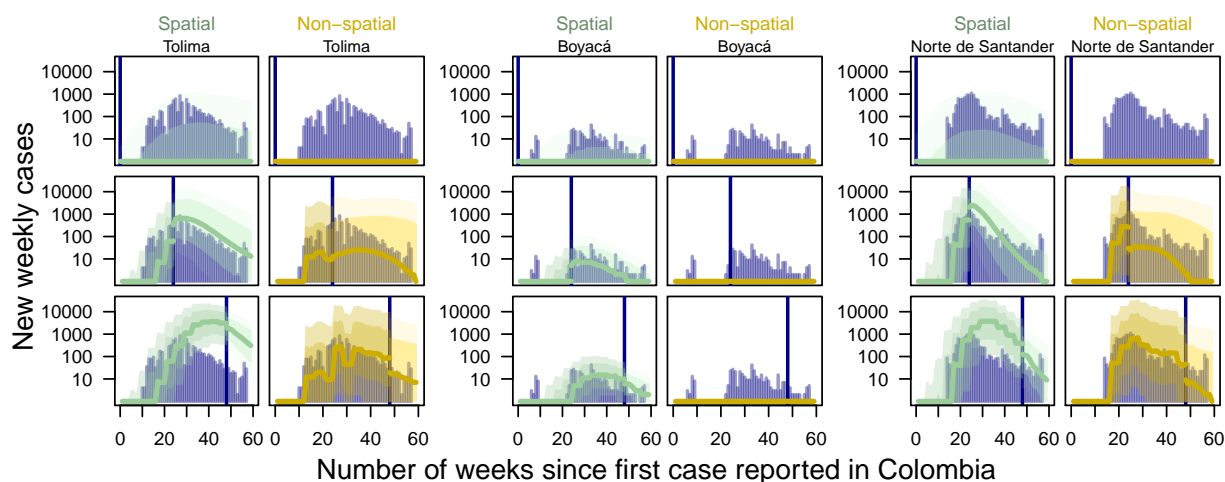

Figure S19: **Forecasts for a spatially coupled (green) and uncoupled (yellow) models with one introduction and static  $R$  for three departments.** Navy bars denote incidence data. Large bands denote the 75% CrI, darker band denotes the 50% CrI, and thick line denotes the median forecast. Each row is from the same time point. Time points were chosen to be equally spaced out through the epidemic, with the first set of forecasts from the week of the first case, the second set of forecasts generated at 24 weeks after the first case was reported in Colombia, and the third set of forecasts generated at 48 weeks after the first case was reported in Colombia.

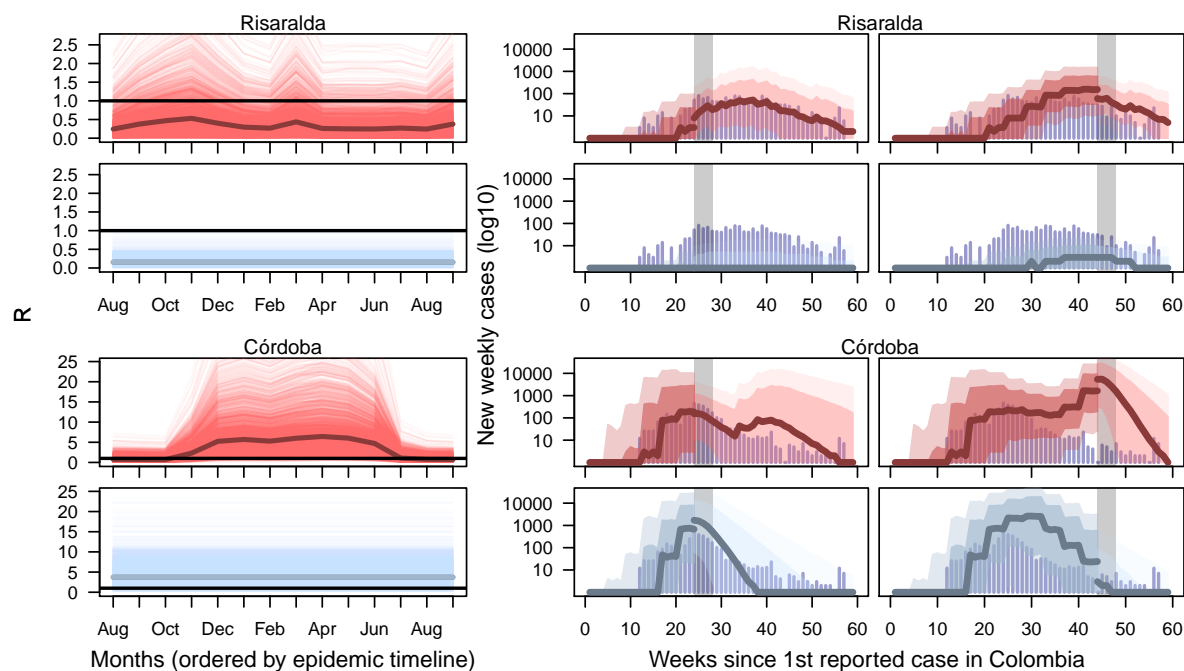

Figure S20: **Fitted  $R$  and forecasts in two departments for models with two ZIKV introductions, cell phone mobility informed human movement, and a dynamic or static  $R$ .** Models with dynamic  $R$  are depicted in red and models with a static  $R$  are depicted in blue. In plots of  $R$ , each line is a draw from the posterior, with a bold median line; horizontal black line depicts  $R = 1$ . The first set of forecasts in the middle column are from the peak week in both Risaralda and Córdoba, 24-28 weeks after the first case was reported in Colombia, and the second set are from 44-48 weeks after the first case was reported in Colombia. Vertical grey bars depict the forecasts and data considered when assessing short-term forecast performance.

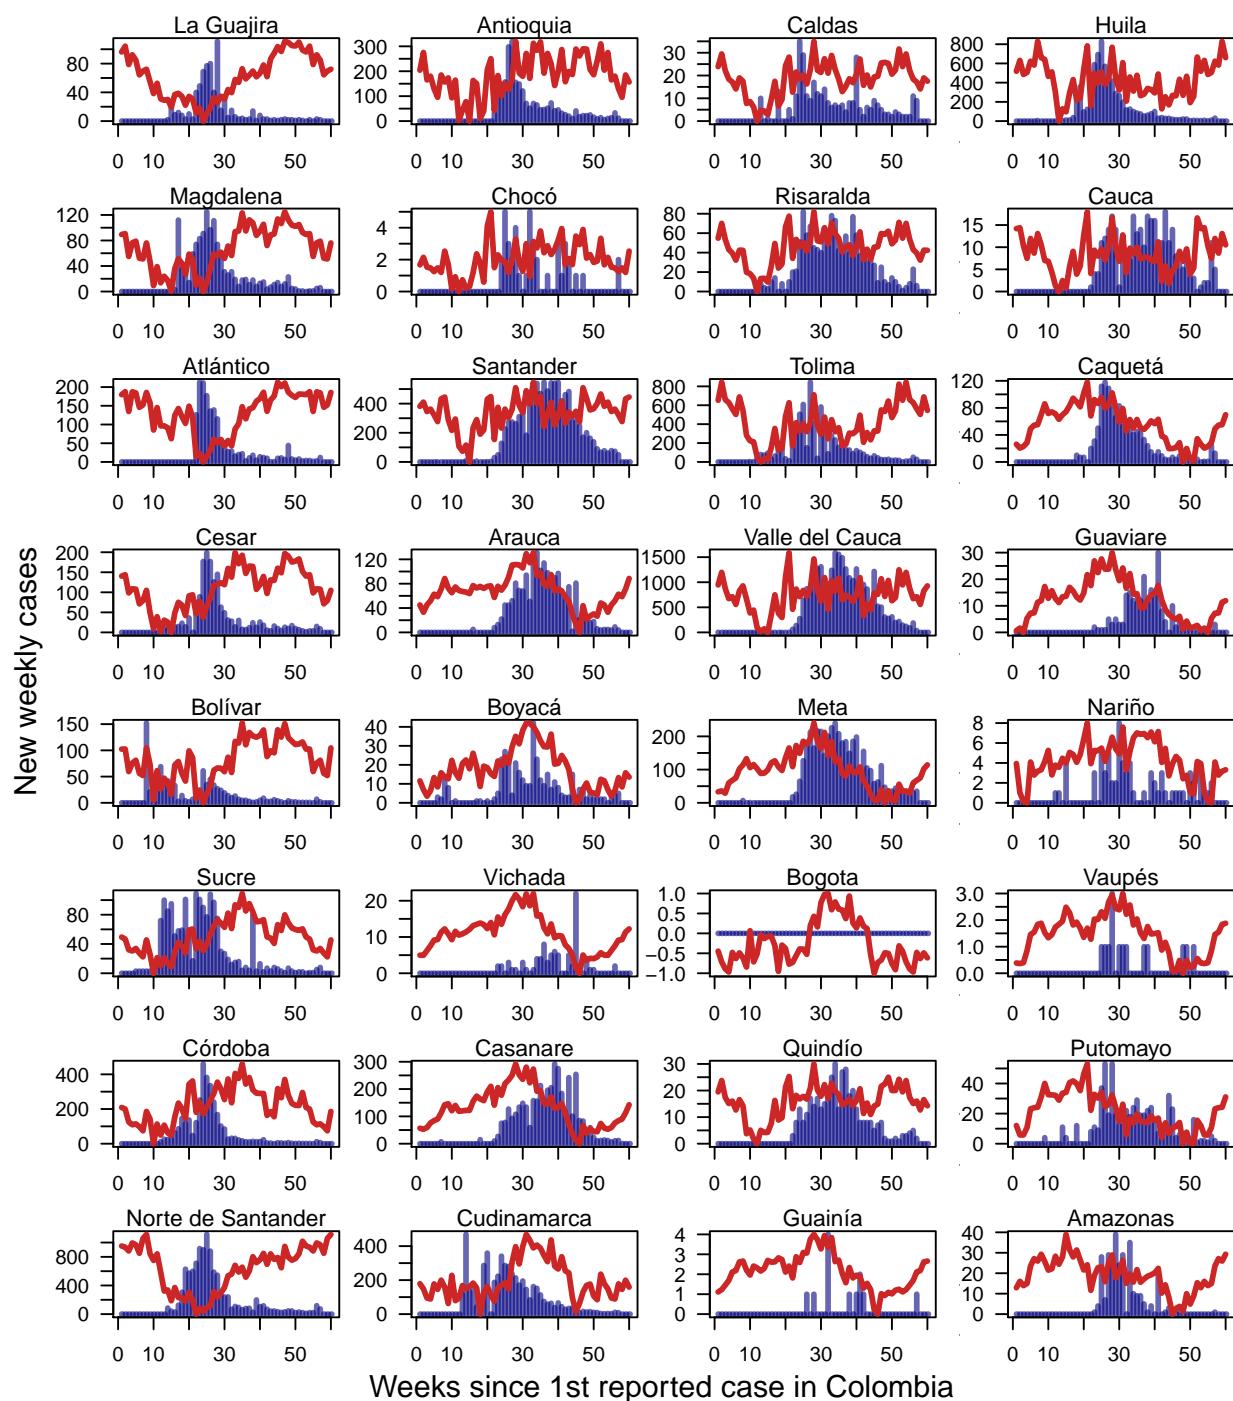

Figure S21: Incidence by department with temperature trends. Blue bars denote weekly Zika incidence and red line denotes temperature trends.

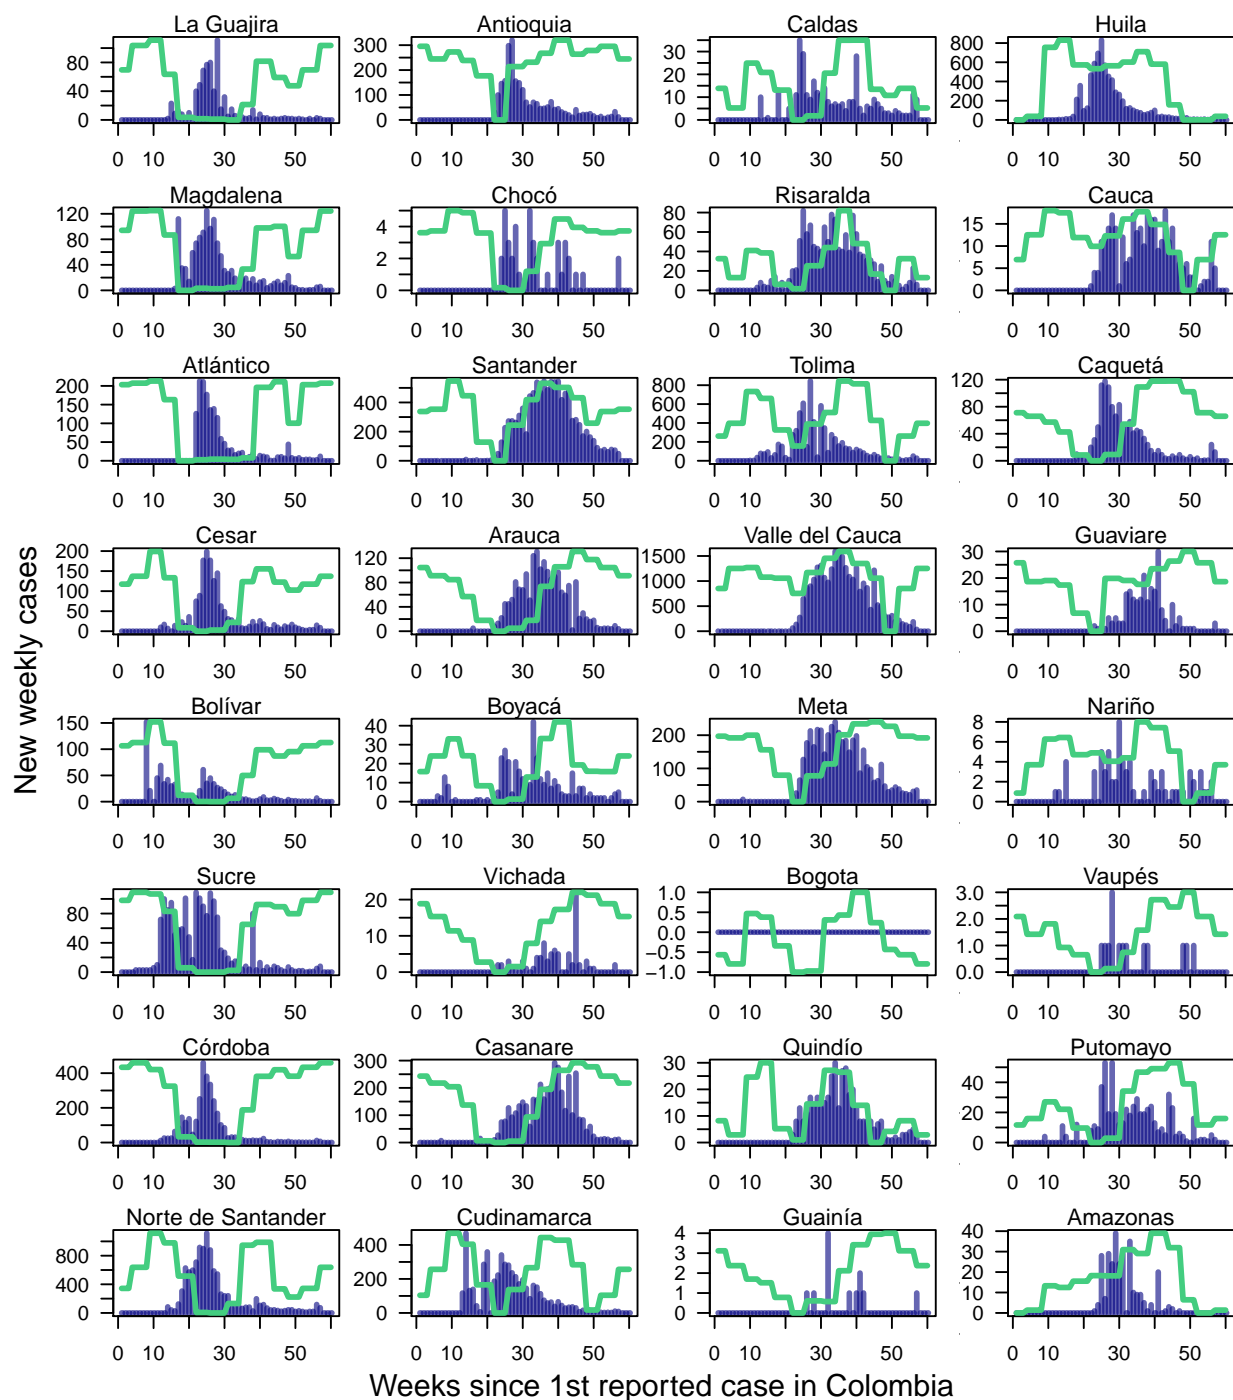

Figure S22: Incidence by department with mosquito occurrence probability trends. Blue bars denote weekly Zika incidence and green line denotes mosquito occurrence trends.

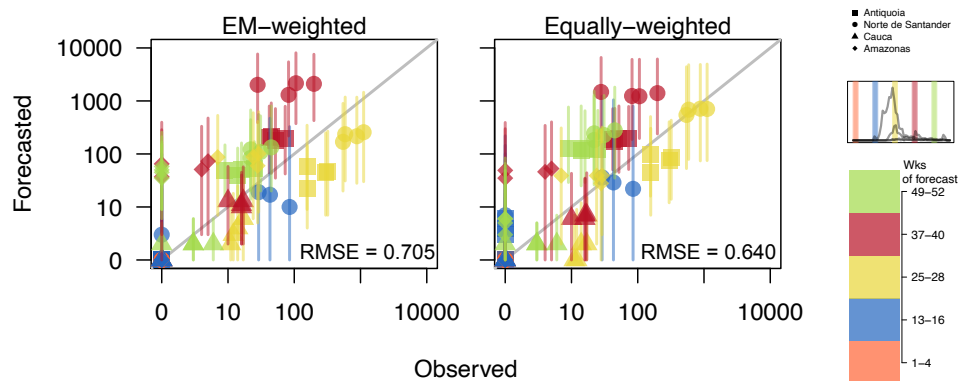

Figure S23: Observed versus forecasted incidence at 1-, 2-, 3-, and 4-week ahead intervals for EM-weighted and equally weighted ensemble models for Antioquia, Norte de Santander, Cauca, and Amazonas. Plotted departments reflect differences in population, epidemic size, and geographic regions of Colombia and are denoted by point type. Point shape denotes department. Point color indicates time at which the forecast was made (visually denoted in inset plot and color bar). Point is the median value and lines are the 50% credible interval. 1:1 line is in grey. The root mean square errors for the EM-weighted and equally weighted forecasts shown here are 0.705 and 0.640, respectively.

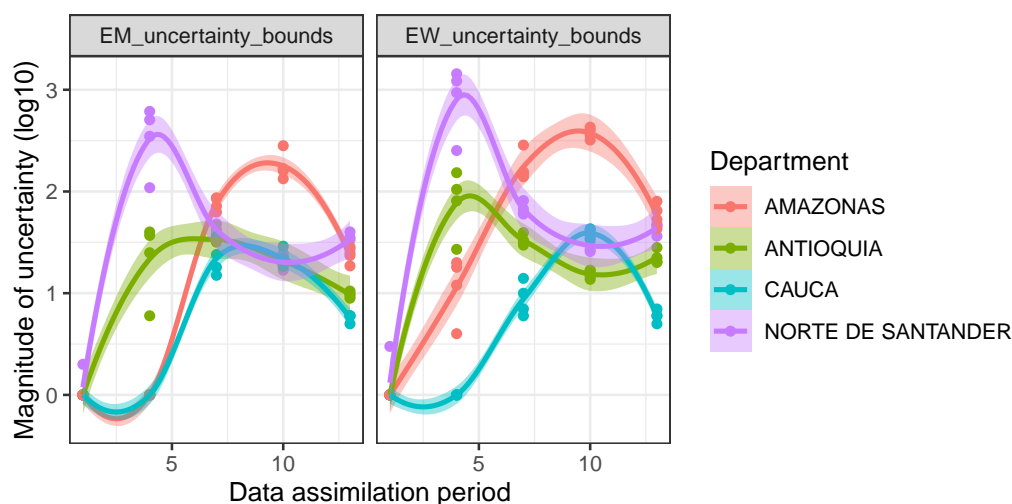

Figure S24: Magnitude of the 50% uncertainty bounds (as shown in Fig. S23) for 1-, 2-, 3-, and 4-week ahead forecasts in five different data assimilation periods for the EM-weighted and equally weighted ensemble models for Amazonas, Antioquia, Cauca, and Norte de Santander. The four points per data assimilation period represent the 1-, 2-, 3-, and 4-week ahead forecasts for each of the four departments denoted by color. Smoothed loess lines are shown to demonstrate how the magnitude of uncertainty changes through time for each department.

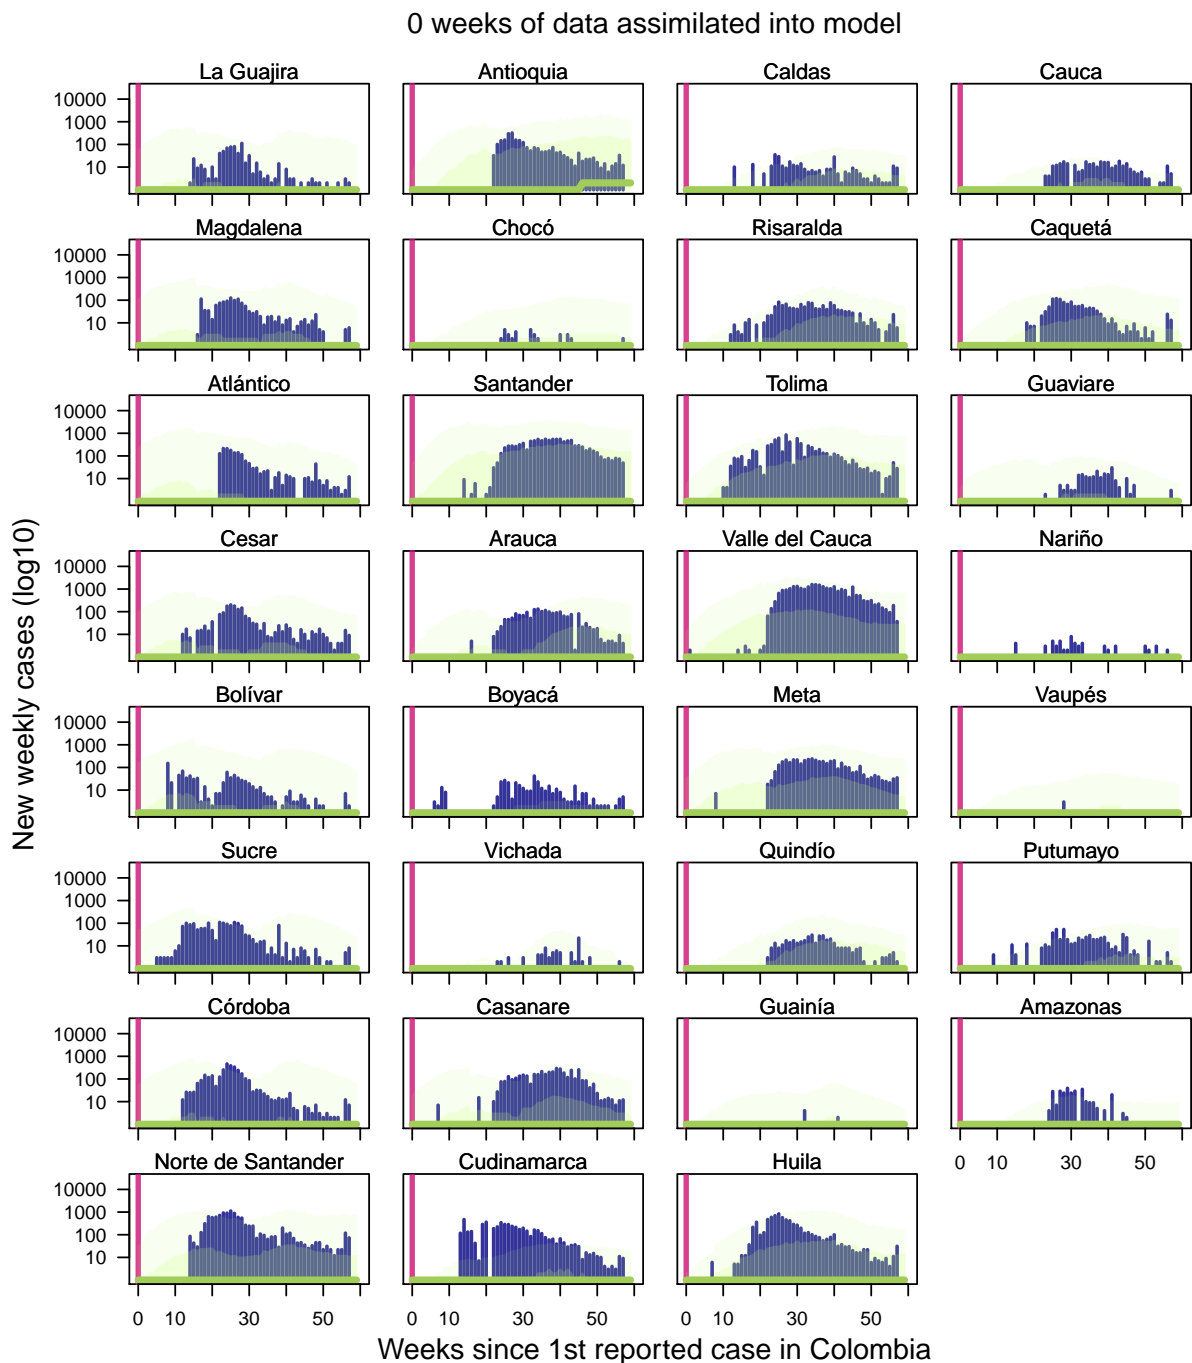

Figure S25: **Observed incidence with initial expectation maximization algorithm-weighted ensemble forecast with no weeks of data yet assimilated into forecasting models.** Navy bars indicate Zika incidence data at weekly time interval [14]. Light green band denotes 75% credible interval, darker green band denotes 50% credible interval, and the dark green line denotes median ensemble forecast. Vertical line indicates the point at which the forecast was made, with data to the left of the line assimilated into the model. Forecasts to the right of the vertical line change as more data is assimilated into the model, while model fits to the left of the vertical line do not change.

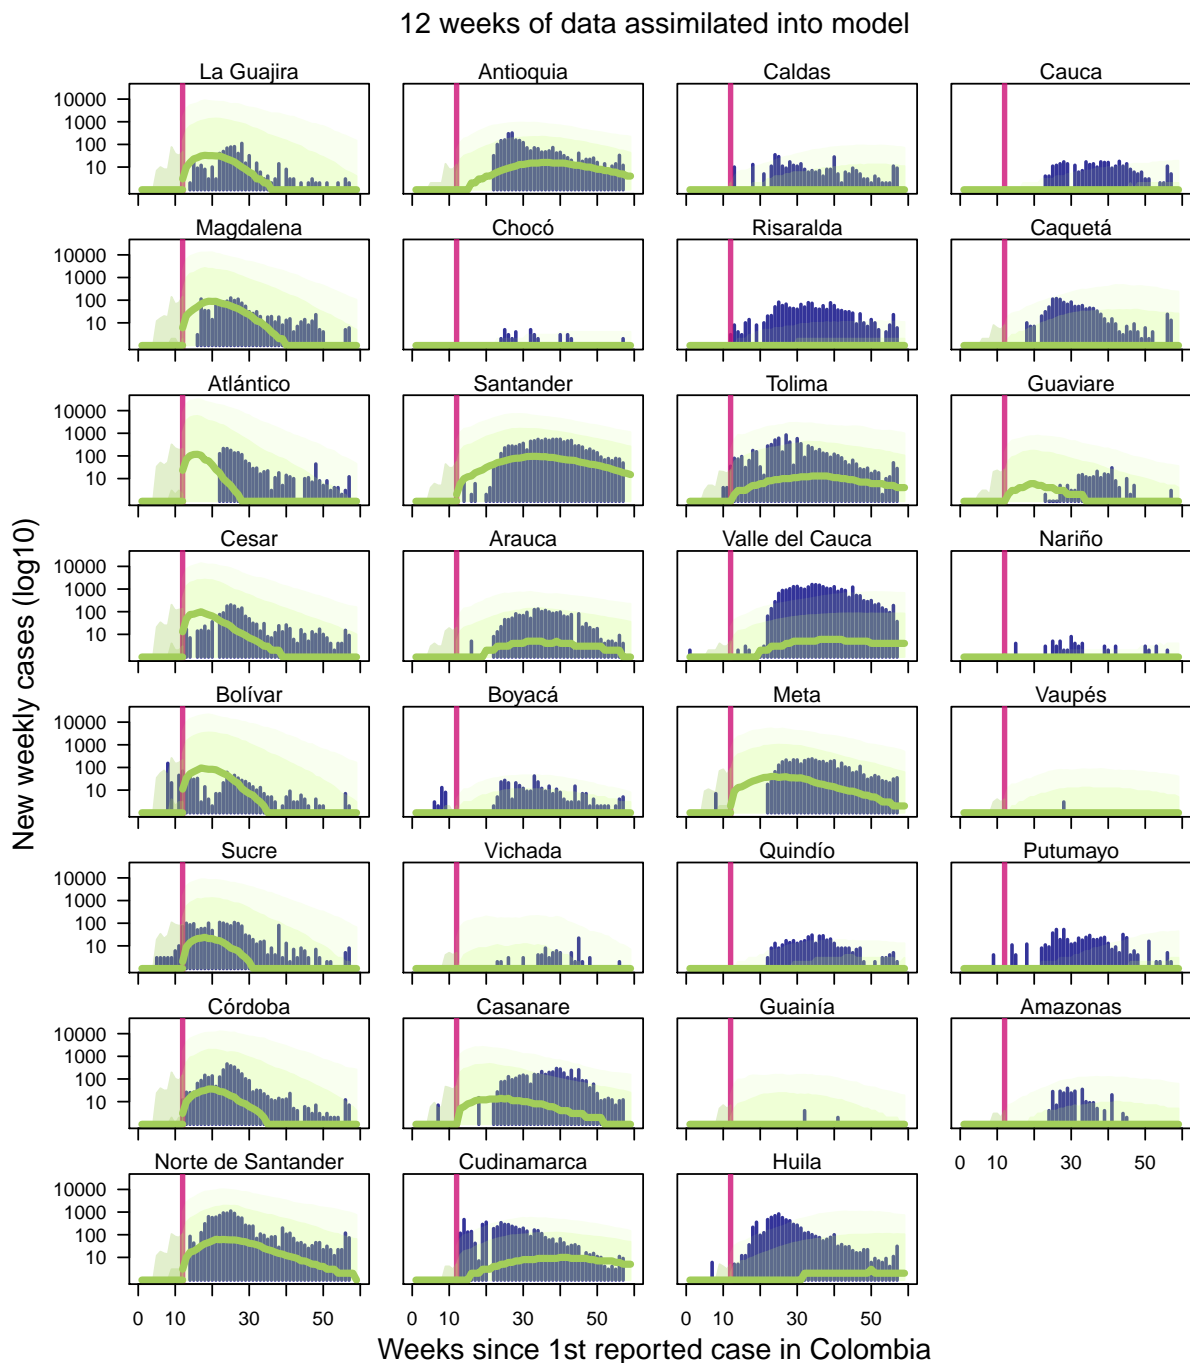

Figure S26: **Observed incidence with expectation maximization algorithm-weighted ensemble forecast with 12 weeks of data assimilated into forecasting models.** Navy bars indicate Zika incidence data at weekly time interval [14]. Light green band denotes 75% credible interval, darker green band denotes 50% credible interval, and the dark green line denotes median ensemble forecast. Vertical line indicates the point at which the forecast was made, with data to the left of the line assimilated into the model. Forecasts to the right of the vertical line change as more data is assimilated into the model, while model fits to the left of the vertical line do not change.



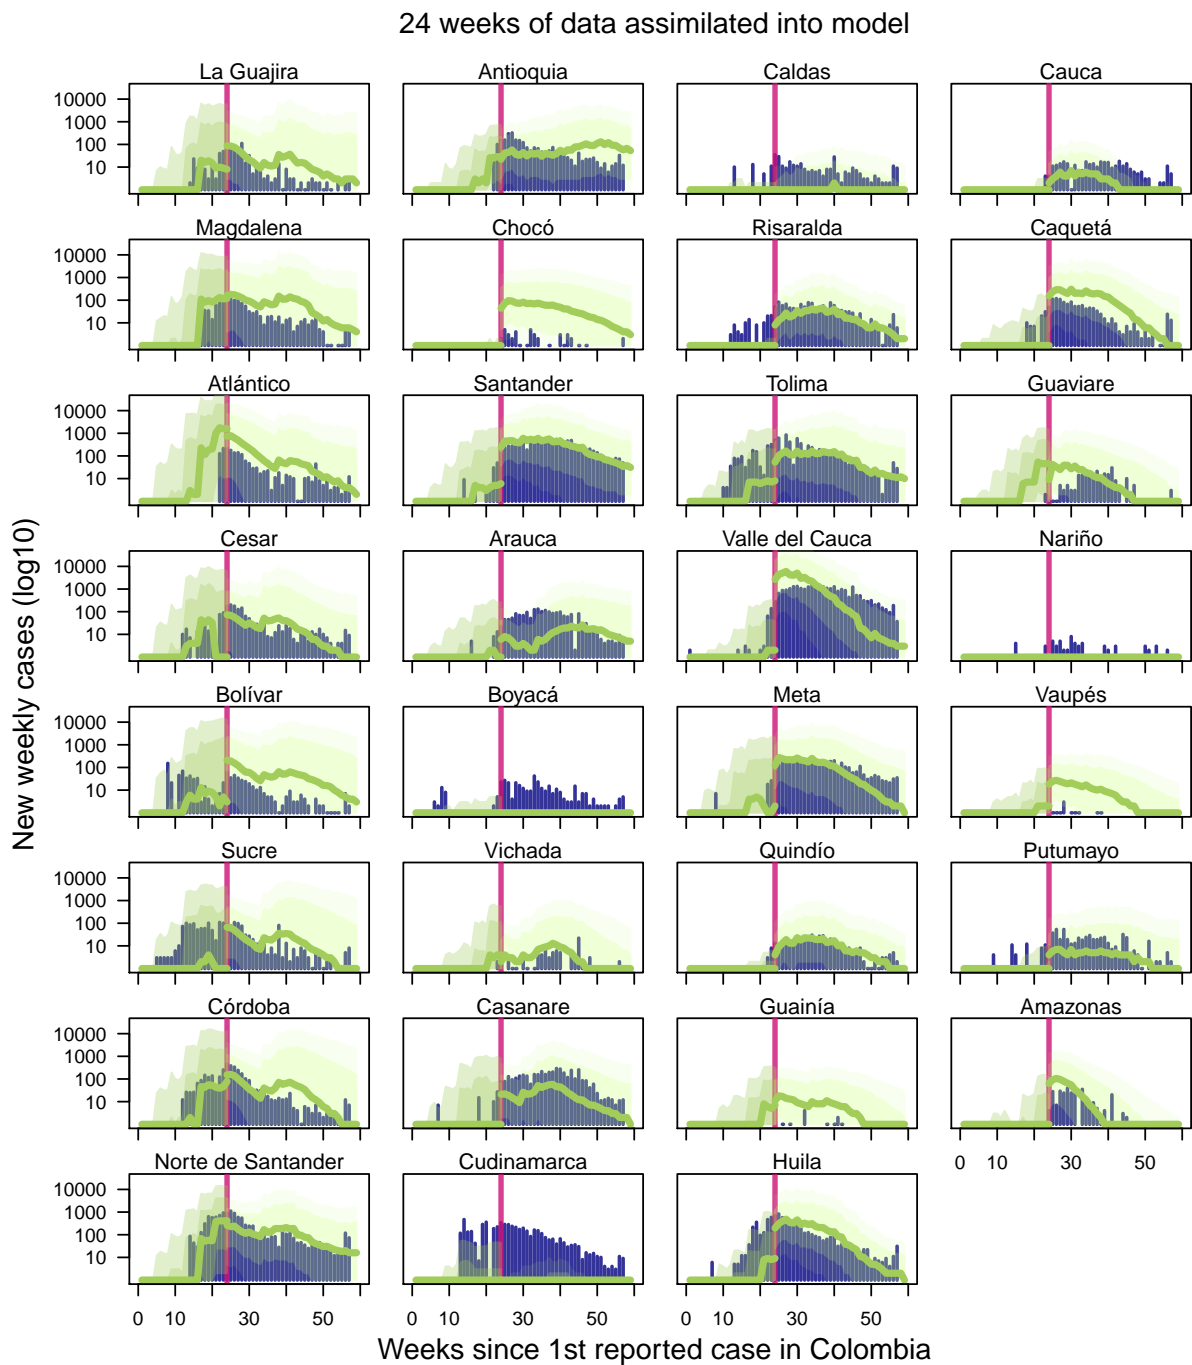

Figure S27: **Observed incidence with expectation maximization algorithm-weighted ensemble forecast with 24 weeks of data assimilated into forecasting models.** Navy bars indicate Zika incidence data at weekly time interval [14]. Light green band denotes 75% credible interval, darker green band denotes 50% credible interval, and the dark green line denotes median ensemble forecast. Vertical line indicates the point at which the forecast was made, with data to the left of the line assimilated into the model. Forecasts to the right of the vertical line change as more data is assimilated into the model, while model fits to the left of the vertical line do not change.

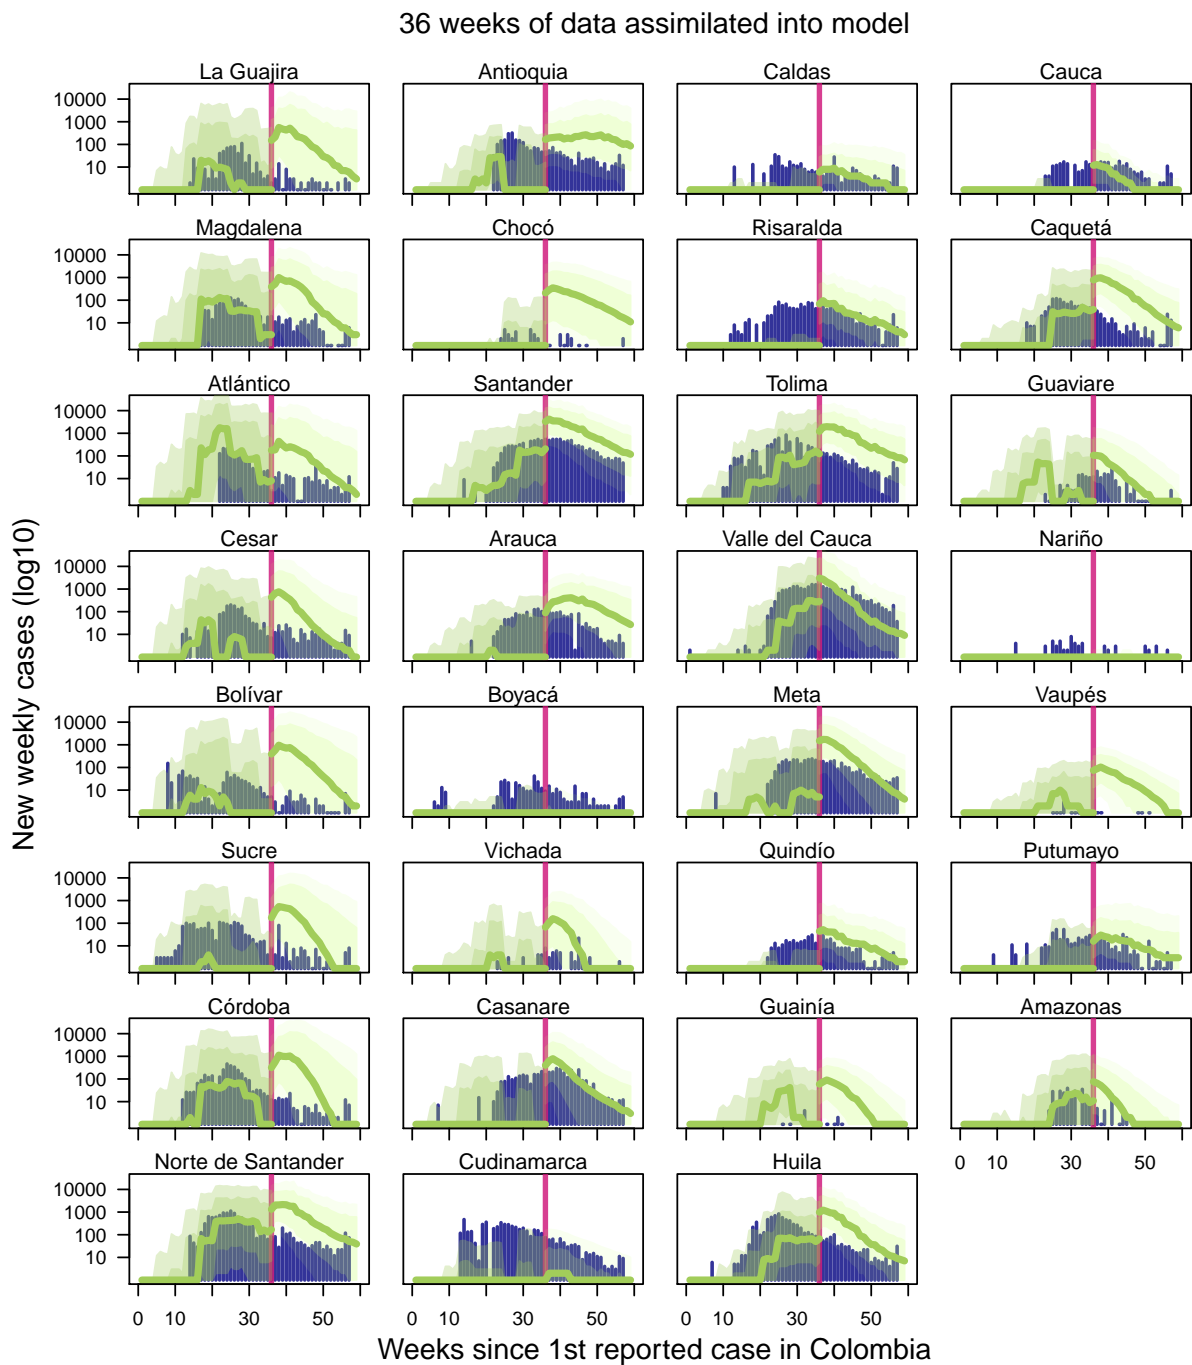

Figure S28: **Observed incidence with expectation maximization algorithm-weighted ensemble forecast with 36 weeks of data assimilated into forecasting models.** Navy bars indicate Zika incidence data at weekly time interval [14]. Light green band denotes 75% credible interval, darker green band denotes 50% credible interval, and the dark green line denotes median ensemble forecast. Vertical line indicates the point at which the forecast was made, with data to the left of the line assimilated into the model. Forecasts to the right of the vertical line change as more data is assimilated into the model, while model fits to the left of the vertical line do not change.

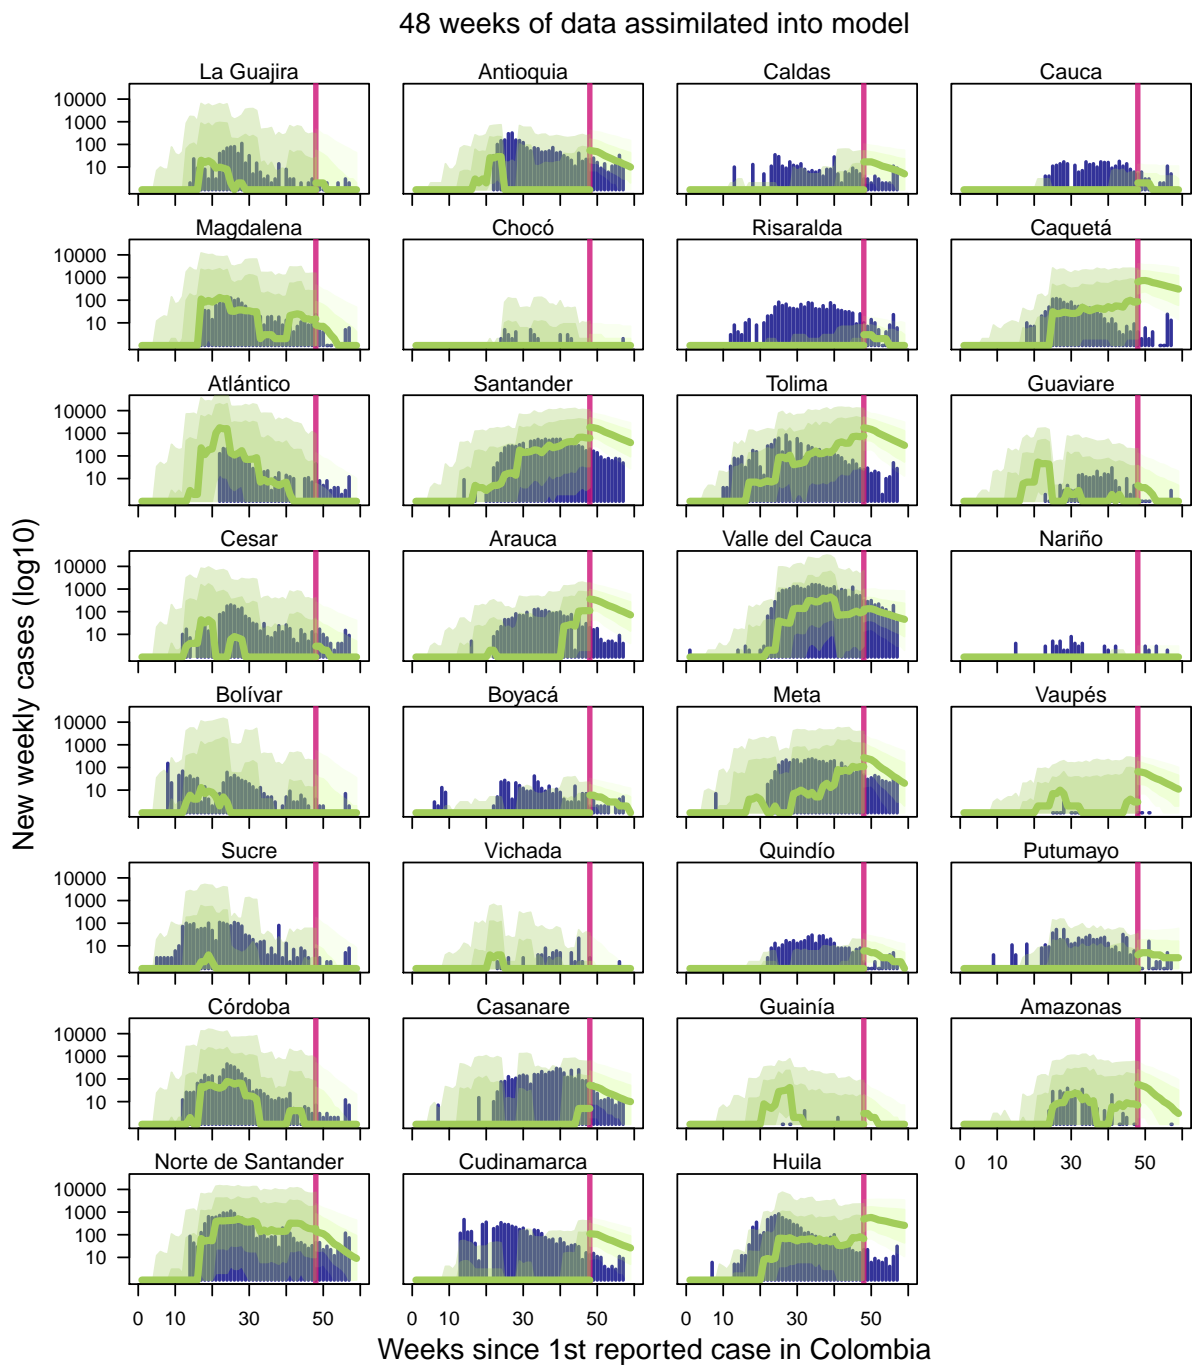

Figure S29: **Observed incidence with expectation maximization algorithm-weighted ensemble forecast with 48 weeks of data assimilated into forecasting models.** Navy bars indicate Zika incidence data at weekly time interval [14]. Light green band denotes 75% credible interval, darker green band denotes 50% credible interval, and the dark green line denotes median ensemble forecast. Vertical line indicates the point at which the forecast was made, with data to the left of the line assimilated into the model. Forecasts to the right of the vertical line change as more data is assimilated into the model, while model fits to the left of the vertical line do not change.

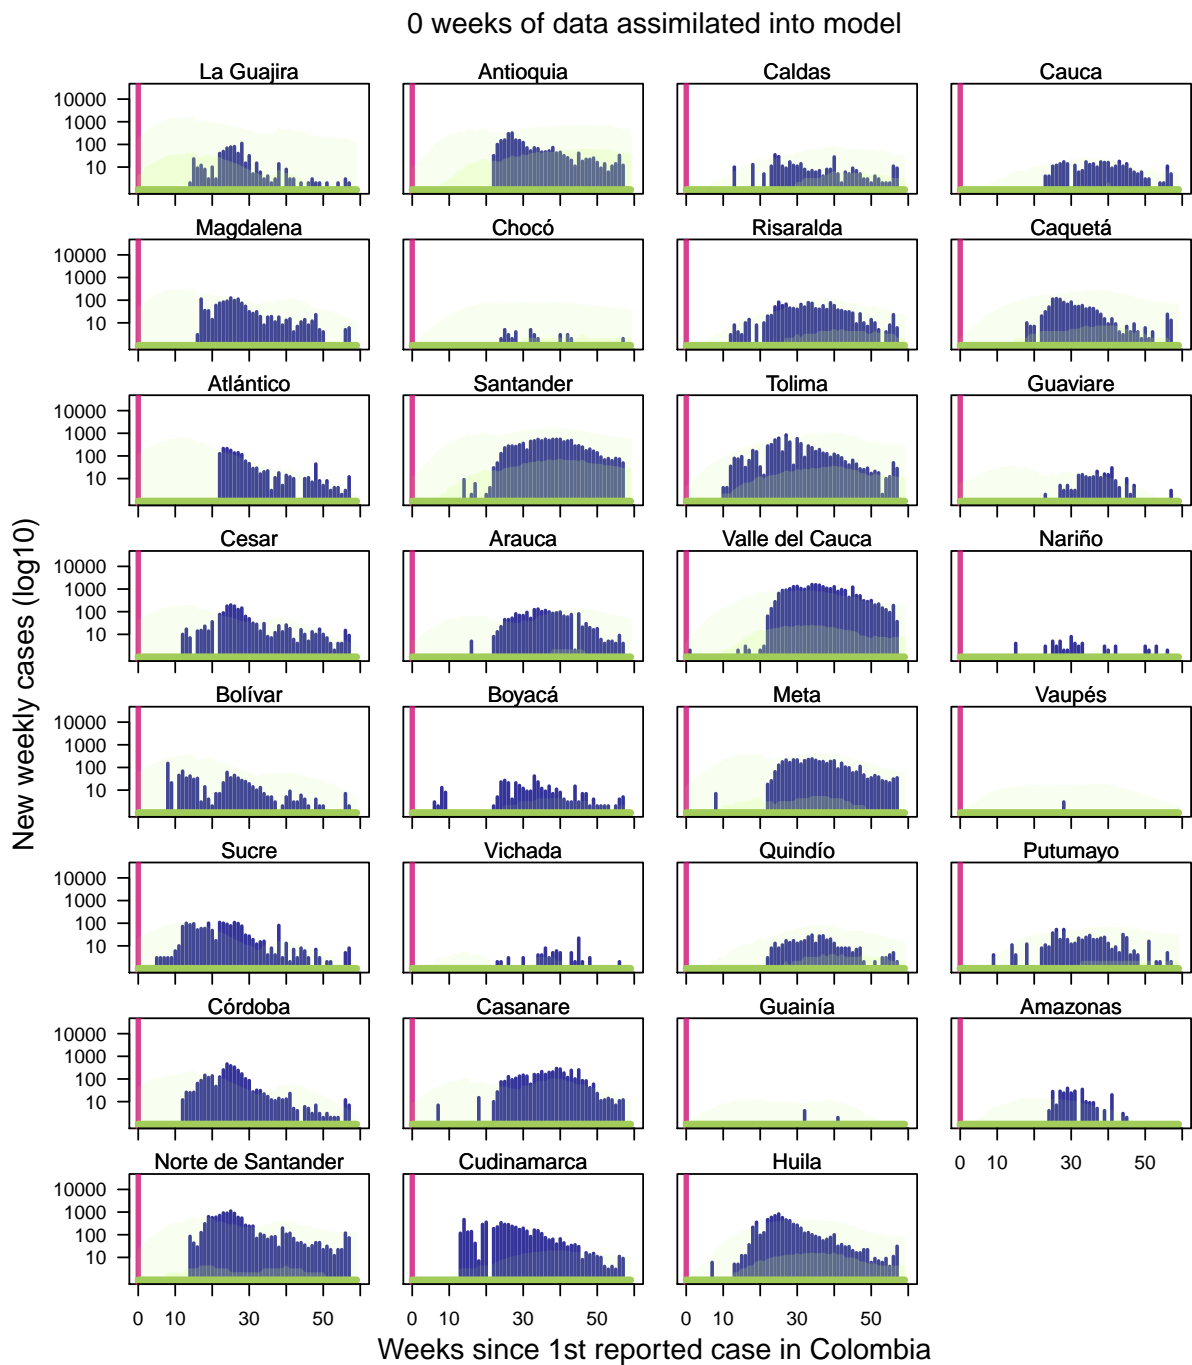

Figure S30: **Observed incidence with initial equally weighted ensemble forecast with no weeks of data yet assimilated into forecasting models.** Navy bars indicate Zika incidence data at weekly time interval [14]. Light green band denotes 75% credible interval, darker green band denotes 50% credible interval, and the dark green line denotes median ensemble forecast. Vertical line indicates the point at which the forecast was made, with data to the left of the line assimilated into the model. Forecasts to the right of the vertical line change as more data is assimilated into the model, while model fits to the left of the vertical line do not change.

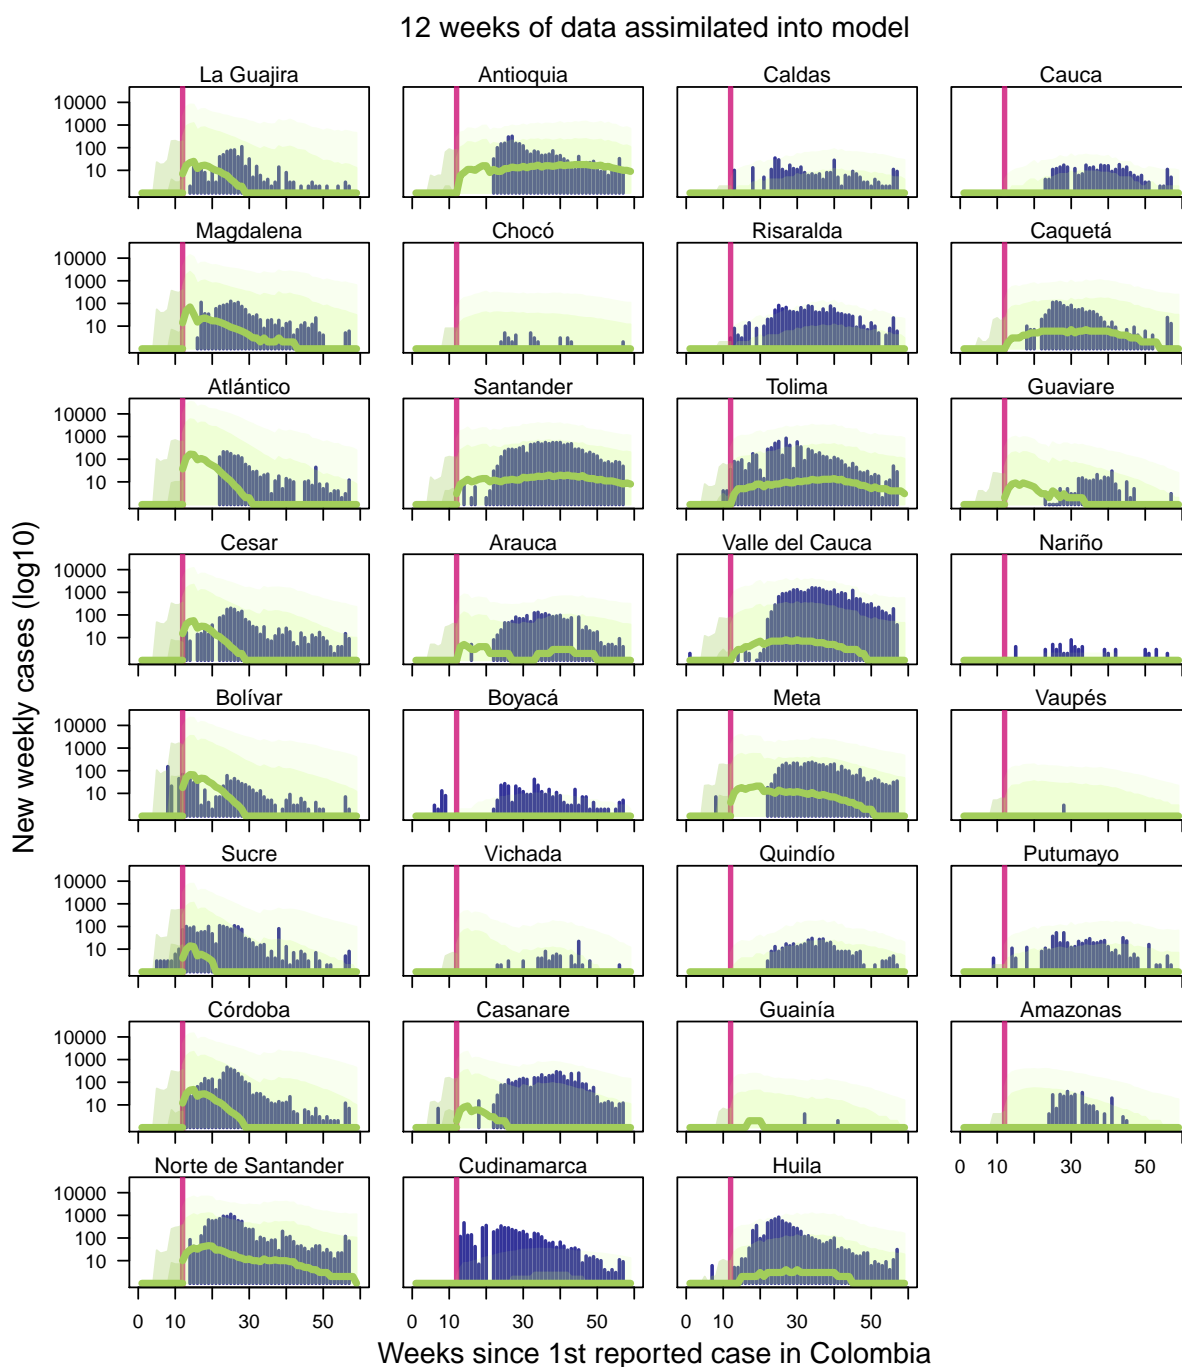

Figure S31: **Observed incidence with equally weighted ensemble forecast with 12 weeks of data assimilated into forecasting models.** Navy bars indicate Zika incidence data at weekly time interval [14]. Light green band denotes 75% credible interval, darker green band denotes 50% credible interval, and the dark green line denotes median ensemble forecast. Vertical line indicates the point at which the forecast was made, with data to the left of the line assimilated into the model. Forecasts to the right of the vertical line change as more data is assimilated into the model, while model fits to the left of the vertical line do not change.

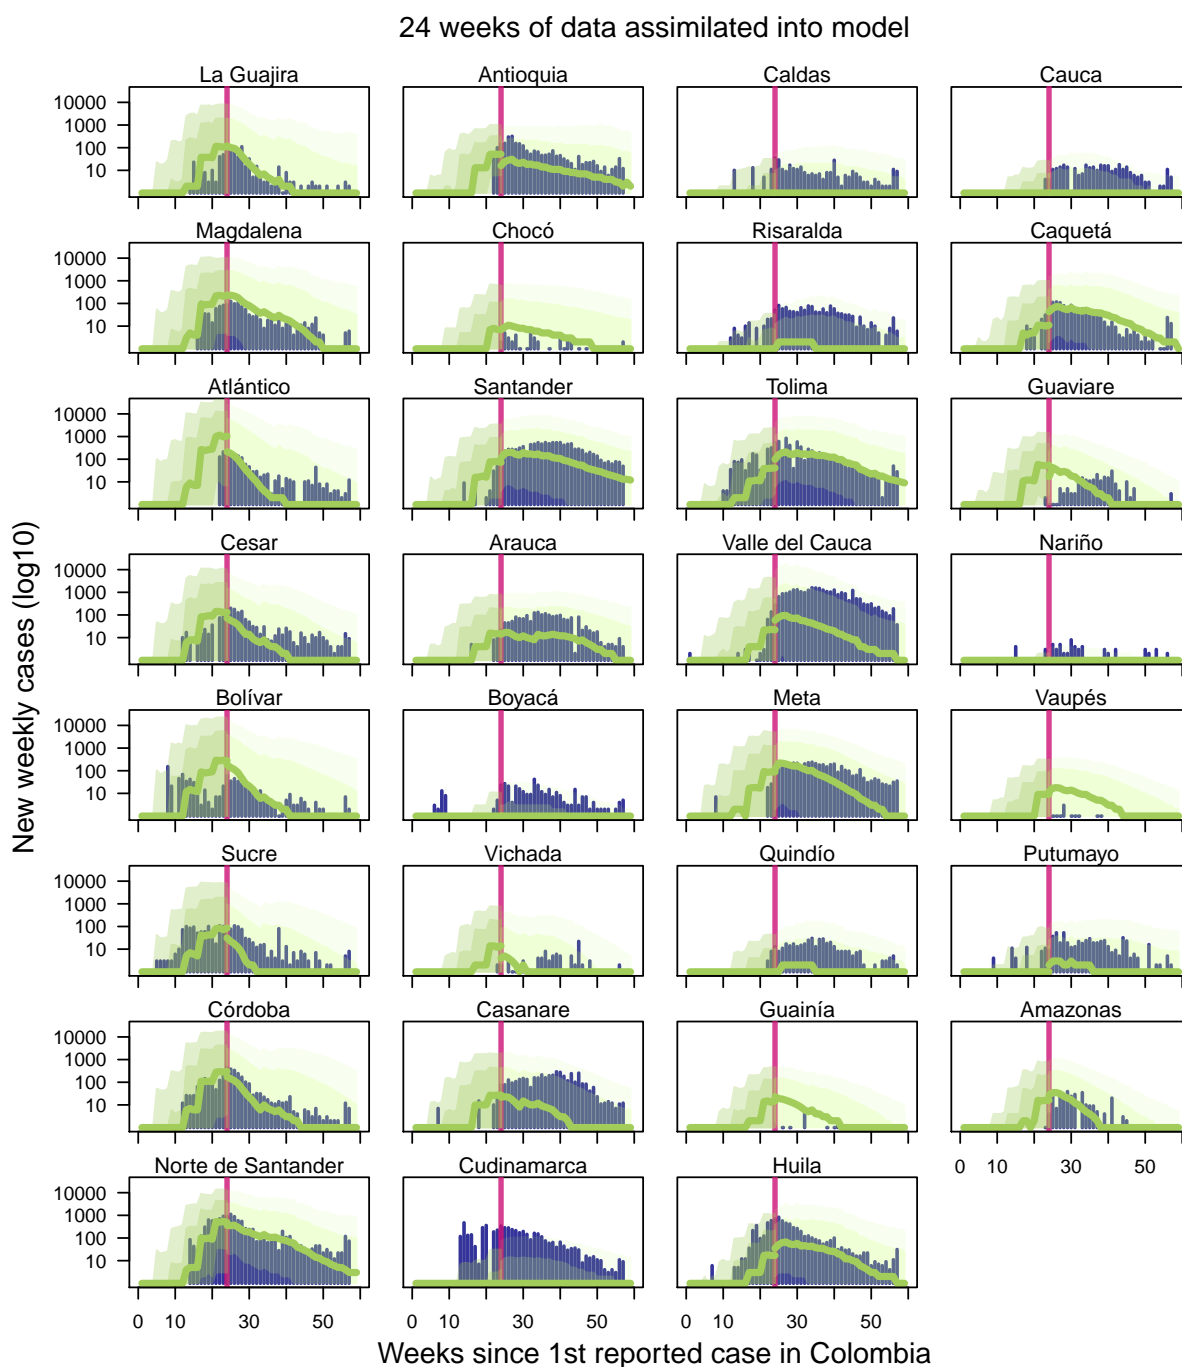

Figure S32: **Observed incidence with equally weighted ensemble forecast with 24 weeks of data assimilated into forecasting models.** Navy bars indicate Zika incidence data at weekly time interval [14]. Light green band denotes 75% credible interval, darker green band denotes 50% credible interval, and the dark green line denotes median ensemble forecast. Vertical line indicates the point at which the forecast was made, with data to the left of the line assimilated into the model. Forecasts to the right of the vertical line change as more data is assimilated into the model, while model fits to the left of the vertical line do not change.

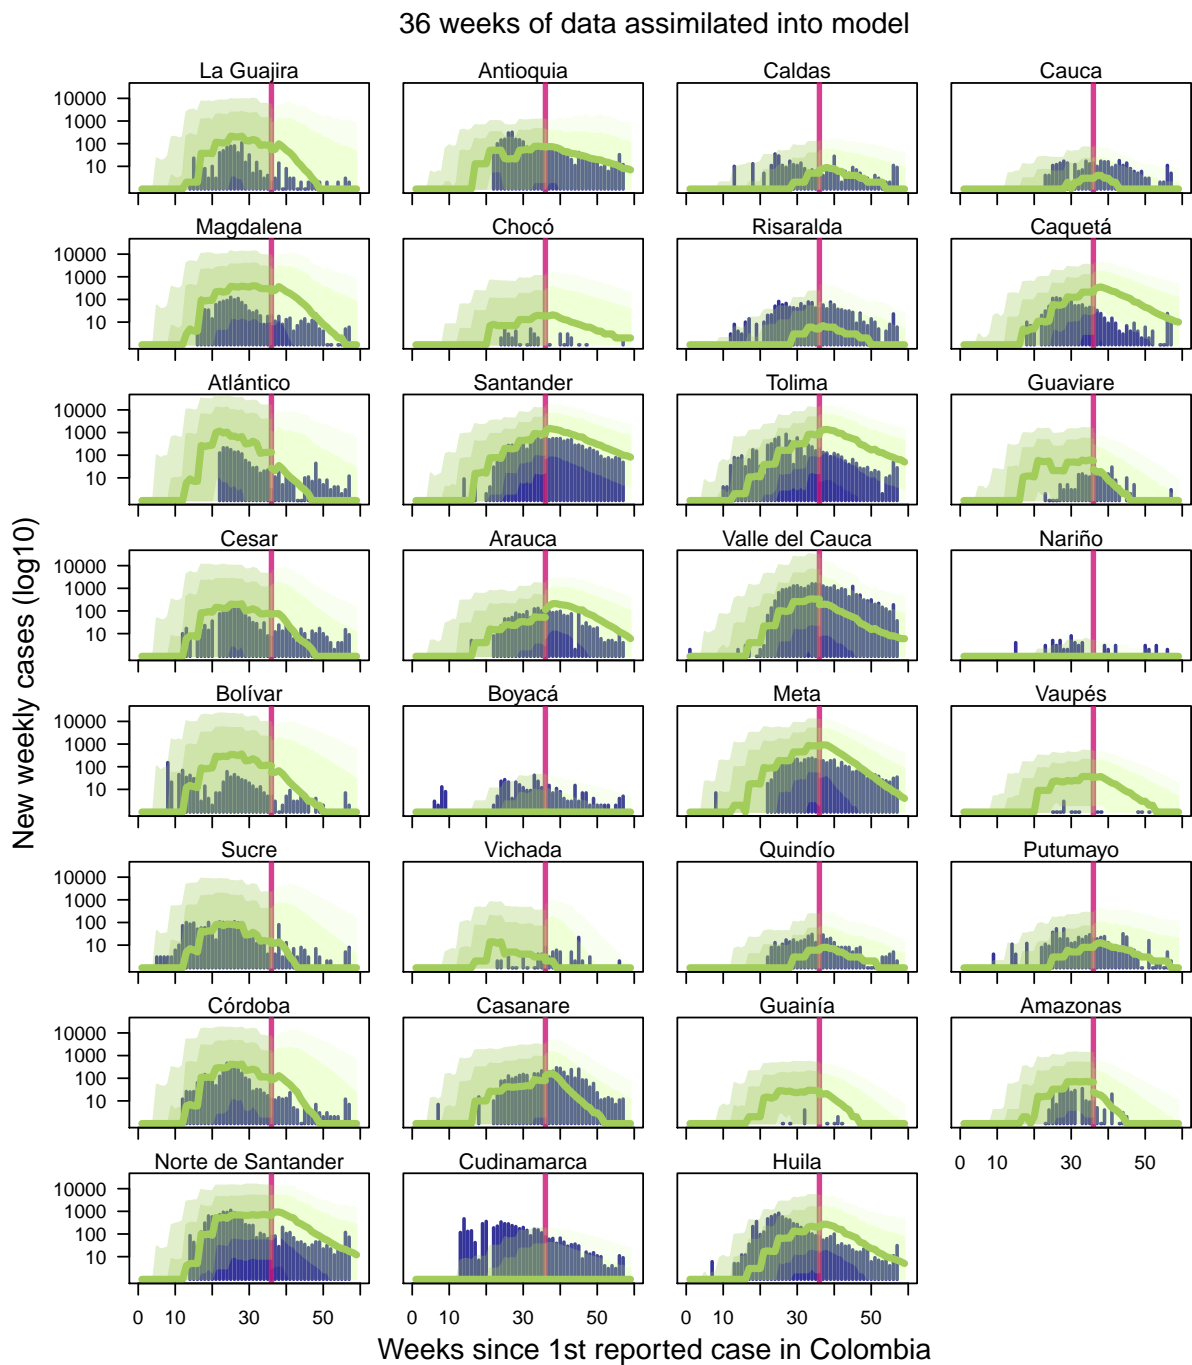

Figure S33: **Observed incidence with equally weighted ensemble forecast with 36 weeks of data assimilated into forecasting models.** Navy bars indicate Zika incidence data at weekly time interval [14]. Light green band denotes 75% credible interval, darker green band denotes 50% credible interval, and the dark green line denotes median ensemble forecast. Vertical line indicates the point at which the forecast was made, with data to the left of the line assimilated into the model. Forecasts to the right of the vertical line change as more data is assimilated into the model, while model fits to the left of the vertical line do not change.

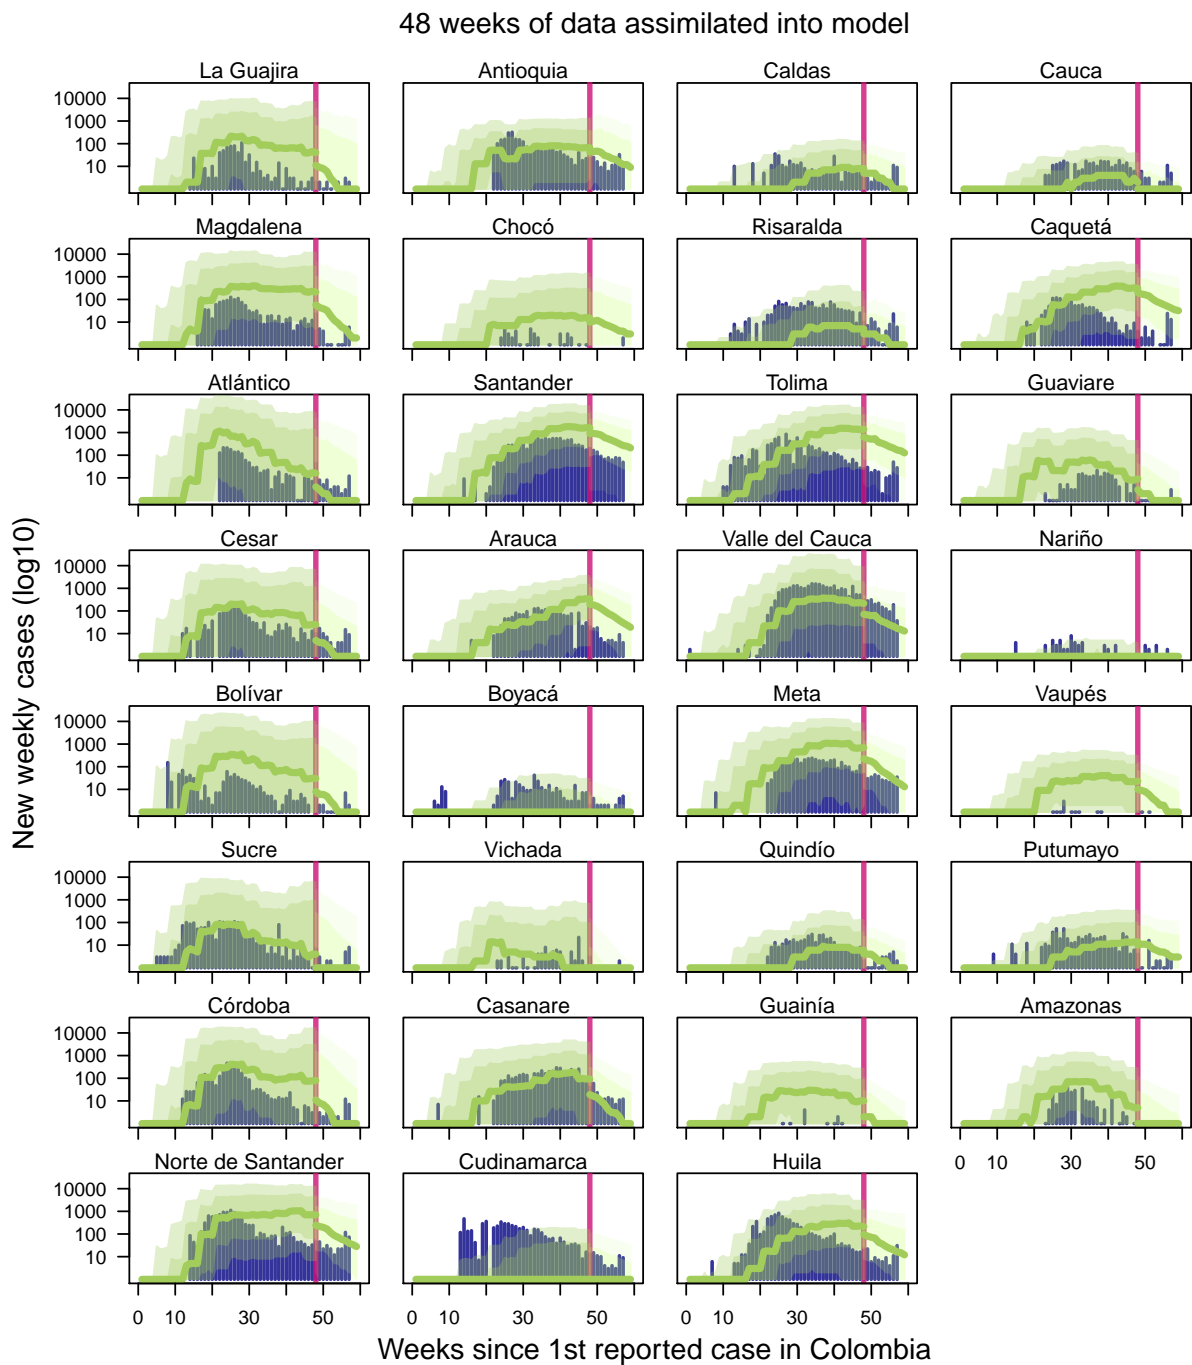

Figure S34: **Observed incidence with equally weighted ensemble forecast with 48 weeks of data assimilated into forecasting models.** Navy bars indicate Zika incidence data at weekly time interval [14]. Light green band denotes 75% credible interval, darker green band denotes 50% credible interval, and the dark green line denotes median ensemble forecast. Vertical line indicates the point at which the forecast was made, with data to the left of the line assimilated into the model. Forecasts to the right of the vertical line change as more data is assimilated into the model, while model fits to the left of the vertical line do not change.



## 138 References

- 139 [1] Sebastian Funk et al. “Comparative Analysis of Dengue and Zika Outbreaks  
140 Reveals Differences by Setting and Virus”. In: *PLOS Neglected Tropical Dis-*  
141 *eases* 10.12 (Dec. 2016), pp. 1–16. DOI: [10.1371/journal.pntd.0005173](https://doi.org/10.1371/journal.pntd.0005173).  
142 URL: <https://doi.org/10.1371/journal.pntd.0005173>.
- 143 [2] Samir Bhatt et al. “The global distribution and burden of dengue”. In: *Na-*  
144 *ture* 496.7446 (Apr. 2013), pp. 504–507. ISSN: 1476-4687. DOI: [10.1038 /](https://doi.org/10.1038/nature12060)  
145 [nature12060](https://doi.org/10.1038/nature12060). URL: <https://doi.org/10.1038/nature12060>.
- 146 [3] Monaise M.O. Silva et al. “Accuracy of dengue reporting by national surveil-
- 147 lance system, Brazil”. In: *Emerging Infectious Diseases* 22.2 (Feb. 2016). DOI:  
148 <https://dx.doi.org/10.3201/eid2202.150495>. URL: [https://wwwnc.](https://wwwnc.cdc.gov/eid/article/22/2/15-0495_article)  
149 [cdc.gov/eid/article/22/2/15-0495\\_article](https://wwwnc.cdc.gov/eid/article/22/2/15-0495_article).
- 150 [4] Deborah P. Shutt et al. “Estimating the reproductive number, total outbreak  
151 size, and reporting rates for Zika epidemics in South and Central America”.  
152 In: *Epidemics* 21 (Dec. 2017), pp. 63–79. ISSN: 1755-4365. URL: [http://www.](http://www.sciencedirect.com/science/article/pii/S1755436517300257)  
153 [sciencedirect.com/science/article/pii/S1755436517300257](http://www.sciencedirect.com/science/article/pii/S1755436517300257).
- 154 [5] Rachel J Oidtman, Guido España, and T Alex Perkins. “Co-circulation and  
155 misdiagnosis led to underestimation of the 2015-2017 Zika epidemic in the  
156 Americas”. In: *medRxiv* (2020). DOI: <https://doi.org/10.1101/19010256>.  
157 URL: <https://www.medrxiv.org/content/10.1101/19010256v1>.
- 158 [6] Sean M. Moore et al. “Leveraging multiple data types to estimate the size  
159 of the Zika epidemic in the Americas”. In: *PLOS Neglected Tropical Diseases*  
160 14.9 (Sept. 2020), pp. 1–25. DOI: [10.1371/journal.pntd.0008640](https://doi.org/10.1371/journal.pntd.0008640). URL:  
161 <https://doi.org/10.1371/journal.pntd.0008640>.
- 162 [7] M. U. G. Kraemer et al. “Utilizing general human movement models to predict  
163 the spread of emerging infectious diseases in resource poor settings”. In: *Sci-*  
164 *entific Reports* 9.1 (2019), p. 5151. ISSN: 2045-2322. DOI: [10.1038/s41598-](https://doi.org/10.1038/s41598-019-41192-3)  
165 [019-41192-3](https://doi.org/10.1038/s41598-019-41192-3).
- 166 [8] T. Alex Perkins et al. “Model-based projections of Zika virus infections in  
167 childbearing women in the Americas”. In: *Nature Microbiology* 1.9 (2016),  
168 p. 16126. DOI: [10.1038/nmicrobiol.2016.126](https://doi.org/10.1038/nmicrobiol.2016.126). URL: [https://doi.org/10.](https://doi.org/10.1038/nmicrobiol.2016.126)  
169 [1038/nmicrobiol.2016.126](https://doi.org/10.1038/nmicrobiol.2016.126).
- 170 [9] Erin A. Mordecai et al. “Detecting the impact of temperature on transmission  
171 of Zika, dengue, and chikungunya using mechanistic models”. In: *PLOS Ne-*  
172 *glected Tropical Diseases* 11.4 (Apr. 2017), pp. 1–18. DOI: [10.1371/journal.](https://doi.org/10.1371/journal.pntd.0005568)  
173 [pntd.0005568](https://doi.org/10.1371/journal.pntd.0005568). URL: <https://doi.org/10.1371/journal.pntd.0005568>.
- 174 [10] Moritz UG Kraemer et al. “The global distribution of the arbovirus vectors  
175 *Aedes aegypti* and *Ae. albopictus*”. In: *eLife* 4 (June 2015), e08347. ISSN: 2050-
- 176 084X. DOI: [10.7554/eLife.08347](https://doi.org/10.7554/eLife.08347). URL: [https://doi.org/10.7554/eLife.](https://doi.org/10.7554/eLife.08347)  
177 [08347](https://doi.org/10.7554/eLife.08347).
- 178 [11] Oliver J. Brady et al. “Global temperature constraints on *Aedes aegypti* and  
179 *Ae. albopictus* persistence and competence for dengue virus transmission”. In:  
180 *Parasites & Vectors* 7.1 (July 2014), p. 338. ISSN: 1756-3305. DOI: [10.1186/](https://doi.org/10.1186/1756-3305-7-338)  
181 [1756-3305-7-338](https://doi.org/10.1186/1756-3305-7-338). URL: <https://doi.org/10.1186/1756-3305-7-338>.
- 182 [12] Miranda Chan and Michael A. Johansson. “The Incubation Periods of Dengue  
183 Viruses”. In: *PLOS ONE* 7.11 (Nov. 2012), pp. 1–7. DOI: [10.1371/journal.](https://doi.org/10.1371/journal.pone.0050972)  
184 [pone.0050972](https://doi.org/10.1371/journal.pone.0050972). URL: <https://doi.org/10.1371/journal.pone.0050972>.

- 185 [13] Allison Black et al. “Genomic epidemiology supports multiple introductions  
186 and cryptic transmission of Zika virus in Colombia”. In: *BMC Infectious Dis-*  
187 *eases* 19.1 (2019), p. 963. DOI: [10.1186/s12879-019-4566-2](https://doi.org/10.1186/s12879-019-4566-2). URL: <https://doi.org/10.1186/s12879-019-4566-2>.  
188
- 189 [14] Amir S. Siraj et al. “Spatiotemporal incidence of Zika and associated en-  
190 vironmental drivers for the 2015-2016 epidemic in Colombia”. In: *Scientific*  
191 *Data* 5.1 (2018), p. 180073. DOI: [10.1038/sdata.2018.73](https://doi.org/10.1038/sdata.2018.73). URL: <https://doi.org/10.1038/sdata.2018.73>.  
192
